# Supplementary material for: Endogenous cell membrane interactome mapping for GLP-1 receptor via ligand-based proximity labeling
Source: Research Square preprint supplement (doi:10.21203/rs.3.rs-3449159/v1), 2023-10-27
Supplement: Supplementary file 1 [file 0eaa2f928b25a011f5f158e0.xlsx]

## Sheet: INS-1E
Supplementary Table 1: Identification and quantification of cell membrane proteins in two cell types
Protein.Group	Genes	First.Protein.Description	Biotinylated	PBS-1 intensity	PBS-2 intensity	PBS-3 intensity	GA-1 intensity	GA-2 intensity	GA-3 intensity	(GA+GLP-1)-1 intensity	(GA+GLP-1)-2 intensity	(GA+GLP-1)-3 intensity
A0A096MJ31;A0A0G2K5G6;G3V9X8	Magt1	Magnesium transporter protein 1	N	1851.48	1923.51	2161.56	9434.79	11250.7	8897.39	3605.6	5475.38	5438.44
A0A096MJ54	Itprip	Inositol 1,4,5-trisphosphate receptor-interacting protein	N				1350.2	1105.1	1146.22
A0A096MJE7;F1LNC9;Q499Q0	Slc19a2	Thiamine transporter 1	N				3907.44	3639.54	2852.07	1790.54	928.833	1260.93
A0A096MJF7;A0A096MJV9;A0A8I6A560;A0A8I6GHN6;A0A8I6GK35;F1LLZ7	Phka1	Phosphorylase b kinase regulatory subunit	N				2194.84	2177.83	1478.55	563.958	612.11
A0A096MJY1	Gpc6	Glypican 6	Y				15784.4	14586.4	14176.3	2630.07
A0A0A0MXV8;A0A8I5ZZK6;A0A8I6A7H8	Gabbr2	Gamma-aminobutyric acid type B receptor subunit 2	N				9439.2		3812.07
A0A0A0MY13	Gpr158	Probable G-protein-coupled receptor 158	N				1743.05	1565.05	2330.06
A0A0G2JSI4;A0A8I5ZM38;A0A8I6G2Z6	Adgre5	Adhesion G protein-coupled receptor E5	N				17653	18561	16047.2	1408.49	1751.49	1074.83
A0A0G2JSK5;A0A8I6GKJ1	Itgb1	Integrin beta	N		537.52	638.597	273423	223494	178921	35934	33539.7	21148
A0A0G2JTH4	Cd47	Leukocyte surface antigen CD47	N	668.142	660.14		24234.2	24626.2	22410	5267.8	5712.84	4099.75
A0A0G2JTL4;Q63116	Kit	Mast/stem cell growth factor receptor	N	2611.82	1848.38	2532.21	273323	297077	271982	49810.5	41981.9	33053.1
A0A0G2JU97;D3ZF64	Abcc3	ABC-type glutathione-S-conjugate transporter	N				2231.06	3898.09	4103.1		1050.02	319.006
A0A0G2JV00;D3ZKI8	Pgap6	Post-GPI attachment to proteins 6	N				8042.64	8751.4	7866.3	1555.11	1361.11	1752.26
A0A0G2JV56	Efna3	Ephrin A3	N		140.436		634.04	1546.03	660.637
A0A0G2JVR0;A0A8J8YBN3	Ptpra	Receptor-type tyrosine-protein phosphatase alpha	N	804.175	1203.61	1262.3	43299.9	44086.2	41688.5	9025.37	11343.8	9976.46
A0A0G2JXG3;A0A8I6A2B0	Tmem30a	Cell cycle control protein	N				5093.23	4128.21	3990.18	815.039	952.035	778.036
A0A0G2JXJ7	Esyt1	Extended synaptotagmin-1	N	3529.1	5522.13	4984.12	87872.4	81188.9	91284.7	14927.4	16885.4	15797.4
A0A0G2JYF7;D4A6H8	Ctnna2	Catenin alpha-2	N	409.479	506.33	442.771	9212.86	12659.4	10869.5	5197.01	6828.28	6227.23
A0A0G2JYJ6	Marveld2	MARVEL (Membrane-associating) domain containing 2 (Predicted)	N	382.414		2301.67	94337.2	99153.2	85368.3	11444.2	10374.7	6740.44
A0A0G2JZ95	Hmgb3	High mobility group protein B1	N	4906.7	7345.2	8417.94	41713.2	37658.9	39014.9	12999.7	16738	10840.8
A0A0G2JZR0;A0A8I6AM47;A0A8I6B5T2;D3ZEX7	Spire1	Spire-type actin nucleation factor 1	N	549.48	1007.93	1342.14	5596.59	5582.25	5791.49	1486.66	2468.81	1724.99
A0A0G2K095;A0A8I5ZR70;A0A8I6AIS5;E9PT65;Q5PQK5	Rdx	Radixin	N	2046.67	2724.45	3425.42	10308.1	9878.16	9169.44	4910.02	6463.81	5338.67
A0A0G2K0P8	Slc44a1	Choline transporter-like protein	N		690.02	445.013	9945.31	9841.28	9167.25	1412.04	1608.04	849.021
A0A0G2K1J9;A0A8I5Y7V9;Q68FZ1	Slc2a2	Solute carrier family 2, facilitated glucose transporter member 2	N	3687.47	5651.03	7489.73	416742	509714	457667	65156.6	53756.5	37126.5
A0A0G2K1M7;A0A8I5Y1S2;A0A8I5ZRU7;A0A8I6AA94;A0A8I6AHD2;A0A8I6ASC3;A0A8I6G530	Ano6	Anoctamin	N	984.527	1517.24	1223.15	40910.2	47651.8	43082.8	7329.94	7606.64	6132.15
A0A0G2K210	Fgfr3	Fibroblast growth factor receptor	N		1828.8		10947.5	10895.8	9364.27	2342.37	2134.79	1644.35
A0A0G2K237;A0A8I5ZKG7;A0A8I6AHR7;F1LX08	Scn3a	Sodium channel protein	N				3261.09	3184.09	2896.08	510.015	1508.05	602.019
A0A0G2K2P5	Tjp1	Tight junction protein ZO-1	N	1133.28	1904.11	2021.62	17122.5	16197.3	16625	6441.88	8743.79	7597.61
A0A0G2K3C7	Fam126a	Family with sequence similarity 126, member A	N			242.007	633.021	440.012	508.017	570.02	287.008	215.006
A0A0G2K4B0;D4A3F5	Gprc5b	G protein-coupled receptor, class C, group 5, member B	N	1039.35	1069.96	1501.38	8196.48	6975.96	7244.73	1516.58	2127.11	2139.19
A0A0G2K5B0;D4A3Z3	Tbc1d24	TBC1 domain family member 24	N	2339.56	2784.89	2929.75	7214.29	6609.13	6064.6	2966.07	3674.68	3271.27
A0A0G2K5N6;A0A8I6AEW1;F1LQT3	Rock2	Rho-associated protein kinase	N	1015.22	878.496	322.205	2346.85	2071.03	2242.11	1008.87	1155.3	1732.76
A0A0G2K663	Marveld2	MARVEL domain-containing 2	N				65112.3	75479	59611.6	7656.21	8340.23	4827.15
A0A0G2K728	Cdh4	Cadherin-4	Y		250.859		342574	388531	311417	53684.1	42338.7	30412
A0A0G2K9C8;A0A8I5Y5Q0;A0A8J8YFM3	Phkb	Phosphorylase b kinase regulatory subunit	N		321.014	1811.08	16372.8	13839.7	16255.7	4610.18	5664.25	5029.23
A0A0G2KA90;A0A8I6GE75	Dsc1	Desmocollin 1	N	3524.09	3885.11	2439.07	4221.12	2746.11	14311.5	1466.04	12493.4	1753.06
A0A0G2KAK9;B1WC12	Mfsd5	Molybdate-anion transporter	N	1422.1	1765.13	1032.65	3980.14	5821.41	5508.42	2872.26	1153.1	2356.63
A0A0G2QC25;A0A8I5YBT4;A0A8I6ANR4;A0A8I6GKU9;E9PT56;F1MA84	Cacna1c	Voltage-dependent L-type calcium channel subunit alpha	N	332.157	381.517	422.168	4082.91	4303.18	4823.41	822.843	854.997	1252.89
A0A8I5Y0H3;A0A8I5YBX7;A0A8I6A923;A0A8L2UKX0;F1LR52	Abcc4	ATP-binding cassette subfamily C member 4	N	328.01		401.011	5030.11	14444.6	8952.26	1591.04	1629.04	1419.05
A0A8I5Y4Y3;F1LV44	Tenm3	Teneurin transmembrane protein 3	N				427.015	705.023	423.014		30.0011
A0A8I5Y571;A0A8I6AQ34	Tenm1	Teneurin transmembrane protein 1	N				2641.2	1599.48	1843.32	496.28
A0A8I5Y5V9;A0A8I5ZSL5	Madd	MAP kinase-activating death domain protein	N	1026.85	1416.74	1629.94	6214.05	5715.44	5787.12	2370.06	3151.67	3092.36
A0A8I5Y929;G3V7J1	Clstn3	Calsyntenin-3	N				3976.99	4246.03	3620.62	760.456	320.819	714.609
A0A8I5ZKS4	Fam126a	Family with sequence similarity 126, member A	N	673.112	781.128	1412.55	7473.8	8063.48	8031.33	3058.42	3798.17	3649.43
A0A8I5ZKY9;A0A8I5ZPU7;A0A8I6GA69;C0KUC5;C0KUC6	Lims1	LIM and senescent cell antigen-like-containing domain protein	N	1841.01	2247.9	2463.29	34860.5	30353.3	32851.6	9565.27	9602.27	8895.56
A0A8I5ZLG9;A0A8I5ZWF0;A0A8I6A710	AABR07037995.1	Phosphorylase b kinase regulatory subunit	N				16378.3	11117.2	11719.3	3119.07	4165.1	1988.04
A0A8I5ZRZ0;A0A8I6AF48	Vangl1	Vang-like protein	N			275.179	2058.91	2813.03	3432.56	970.484	1358.83	1515.01
A0A8I5ZS66;G3V9Y2	Plpp1	Phospholipid phosphatase 1	N				2079.06	3324.09	3882.11	623.016	1316.03	1303.04
A0A8I5ZSB8;M0RB24	Rgmb	RCG22983	N				9916.43	13895.9	12469.8		1909.37	1579.52
A0A8I5ZST9;G3V6A0	Pdgfra	Receptor protein-tyrosine kinase	N				2176.87	2423.45	1603.45	1103.35
A0A8I5ZT89;A0A8I6A5B0	Fam126b	Family with sequence similarity 126, member B	N		271.908	382.655	2915.87	2728.67	2844.92	1293.59	1227.67	1361.25
A0A8I5ZUI2;D3ZF54	Ano10	Anoctamin	N	4585.87	5177.86	4042.57	12567.1	14752.6	13940.8	5296.2	6330.85	6641.85
A0A8I5ZVQ1	Efna3	Ephrin A3	N				4427.44	4425.62	4229.15		755.648	419.82
A0A8I5ZWG8;A0A8I6AIP3	Eef1a2	Elongation factor 1-alpha 2	N	2062.74	2297.6	2603.02	4853.45	4107.01	4301.67	2862.02	2530.03	2058.97
A0A8I5ZXC2	Phkb	Phosphorylase b kinase regulatory subunit	N		701.148	477.421	3077.43	3528.16	3500.58	1093.17	1333.97	1237.58
A0A8I5ZXH4	Slc8a1	Sodium/calcium exchanger 1	N				38167.7	36630.2	31297.9	6840.18	6451.12	6935.12
A0A8I5ZZZ3;Q6DUV1	Prkce	Protein kinase C	N					1196.03	870.023
A0A8I6A177;A0A8I6A180;A0A8I6AKL5	Tenm4	Teneurin transmembrane protein 4	N	1962.11	1516.62	1192.54	53453.2	58963.3	52836.8	8504.73	7017.78	5304.35
A0A8I6A5S8;A0A8I6AFG9	Npdc1	Neural proliferation, differentiation and control, 1	N				6027.58	5138.2	4605.46		911.919
A0A8I6A609	Gpc6	Glypican 6	N				119124	143701	119357	17018.5	12589.8	10204.7
A0A8I6A660;D3ZJ32	Esyt2	Extended synaptotagmin 2	N	5290.85	6813.64	7066.34	43625.4	43015.4	41843.1	9709.87	12157	11455.9
A0A8I6ABL2	Tenm3	Teneurin transmembrane protein 3	N	2367.93	3320.44	3662.41	332494	404635	378947	64797.6	52164.6	39327.6
A0A8I6ABL6;G3V803	Cdh2	Cadherin-2	N				1984.07	1822.06	1430.05
A0A8I6ACJ0;D4A188	Rgma	Repulsive guidance molecule BMP co-receptor a	N				2099.09	2481.12	1674.07
A0A8I6AF64	Gng4	Guanine nucleotide-binding protein subunit gamma	N	2317.98	2131.1	2048.59	8489.42	7644.58	7309.1	4752.1	6068.11	5225.86
A0A8I6AGD6	Elapor2	Endosome-lysosome-associated apoptosis and autophagy regulator family member 2	N	2017.29	1733.77	2341.64	26861	28327.2	26729.8	4812.69	5293.05	4416.6
A0A8I6AGW9;D3Z981	Plxna1	Plexin A1	N	2894.52	3284.44	4018.76	196526	219100	203967	30901.4	28752.2	21334
A0A8I6AL67	Slc6a6	Transporter	N				925.031		445.017
A0A8I6ASU4;G3V710	Jag1	Delta-like protein	N				7798.18	5917.15	6617.17	1574.04	1213.03
A0A8I6G961;A0A8L2QQY0	Slc44a2	Choline transporter-like protein	N				765.024	702.027	858.029		141.004
A0A8I6GAY3;G3V6P8	Gng12	Guanine nucleotide-binding protein subunit gamma	N	1509.34	2501.57	2017.73	2748.64	3134.43	3262.68	2760.63	3070.22	3811.86
A0A8I6GHG4;G3V9I2	Grik3	Glutamate receptor	N				4000.73	3643.66	2956.58	830.29	870.978	503.177
A0A8J8YIL8;F1LM54	Fgfr1	Fibroblast growth factor receptor	N				11755.9	13694.6	10853.5	1650.95	1681.54	1137.2
A0A8L2QZI9	Marveld2	Occludin	N	744.952	1204.62		661137	709484	613396	86754.8	61680.4	42421
A0A8L2UHD3	Alcam	CD166 antigen	N				84251.4	83778.1	86523.2	9163.76	6809.3	4773.89
A1A5P9	Magee1	Melanoma-associated antigen E1	N				3108.56	3531.72	4734.9	1256.2	1072.2	1403.43
A1L1K4	Cdc42se2	CDC42 small effector protein 2	N	101.005	90.0042	353.013	365.018		504.025		444.025	294.013
A4KWA8;Q925N7	Clec2d6;Ocil	C-type lectin domain family 2 member D6	N				2176.06	1719.05	1571.05
B0BNK7	Lrfn3	Leucine-rich repeat and fibronectin type-III domain-containing protein 3	N		480.278	313.042	51040.7	53954.1	51043.2	18467.5	15445.9	12326.9
B0BNL6	Arrdc1	Arrestin domain-containing protein 1	N	1555.5	2025.76	2287.49	7509.17	6390.66	6114.25	2607.99	3456.77	3058.08
B1H234	Flrt3	Leucine-rich repeat transmembrane protein FLRT3	N				20364.4	22487.8	21731.4	3098.97	3460.01	1847.41
B1H267	Snx5	Sorting nexin-5	N	901.71	1208.89	1487.96	7636.32	7164.81	7997.96	3655.67	3827.18	3729.4
B2GV46	Ffar3	Free fatty acid receptor 3	N			342.01	2751.07	3214.1	2191.07	457.012		495.015
B2GV54	Nceh1	Neutral cholesterol ester hydrolase 1	N	4644.59	5358.91	5953.27	32174.6	39323.5	40962.7	14523.6	17732.4	19971.6
B2GV87	Ptpre	Receptor-type tyrosine-protein phosphatase epsilon	N				800.024	832.028	1069.03	172.005		177.006
B2RZ37	Reep5	Receptor expression-enhancing protein 5	N	20391.7	21148.5	23284.6	30344.1	29616.1	29024.8	23115.5	25346.9	22553.5
B4F779	Appl2	DCC-interacting protein 13-beta	N	974.095	1609.84	1551.17	8904.65	8800.98	9664.18	2686.37	3491.38	3199.88
B4F795	Slc44a2	Choline transporter-like protein 2	N				8788.85	9641.06	9391.4	1298.09	2250.33	1307.38
B4F7C5	Lrrtm4	Leucine-rich repeat transmembrane neuronal protein 4	N				41077.2	42057.2	39290.9	5610	4475.1	3868.63
B4F7E7	Pals1	Protein PALS1	N				1872.37	2327.57	1791.73	759.65	647.758	1058.88
B4F7E8	Niban2	Protein Niban 2	N	1022.24	3254.71	1216.61	16779.1	17398.8	17534.5	6303.78	7363.27	6294.47
B5D5N9	Slc7a2	Cationic amino acid transporter 2	Y	19283.2	18700.2	21816.7	705535	740366	704722	126972	118599	114707
B5DEL3	Ttc17	Tetratricopeptide repeat protein 17	N		644.253	1475.53	7894.93	7612.79	7575.46	2905.48	3417.15	3910.6
B5DEN9	Vps28	Vacuolar protein sorting-associated protein 28 homolog	N	230.327	458.382	740.5	14958.9	11300.4	11379	2561.27	4064.64	3008.03
B5DFN2	Ahcyl1	S-adenosylhomocysteine hydrolase-like protein 1	N	18764.5	26686.9	27483.2	136045	134031	134516	37114.9	54389.4	47764.7
B5MEV3	Slc52a2	Solute carrier family 52, riboflavin transporter, member 2	N		617.015		4684.11	4279.1	5555.13	1388.03	2106.05	1127.02
C0HL12	Adgrb1	Adhesion G protein-coupled receptor B1	N	972.474	1048.96	564.745	11422.3	12776.6	11209	2276.7	2089.7	1945.82
D3Z8L7	Rras	Ras-related protein R-Ras	N				1342.29	1699.77	1546.04	339.985	459.998	642.442
D3Z9I5	Slc26a6	RCG25530, isoform CRA_c	N		1456.03			1373.03	1690.04	1039.02	1245.03	930.02
D3ZAN2	Cdhr2	Cadherin-related family member 2	N				4012.97	3775.65	3625.13	1645.78	1236.94
D3ZB51	Igsf9b	Protein turtle homolog B	N		184.571	4042.05	64267.3	70173.3	64369.9	9387.43	7164.73	5329.78
D3ZBW5	LOC685203	Small membrane A-kinase anchor protein	N					1138.03	596.016	497.014	230.006	544.013
D3ZDX5	Plxnb1	Plexin B1	N	647.853	879.199	1015.33	26694.4	29726.8	27503.2	6271.34	6556.52	5243.75
D3ZE55	Pcdh8	Protocadherin-8	N				4247.65	5101.58	4306.57	1362.64	1118.64	1518.5
D3ZE85	Frrs1l	DOMON domain-containing protein FRRS1L	Y	1598.35	1338.29	1099.88	77283.8	77852.5	69856.1	12428.7	10282.7	8016.19
D3ZEH5	Sidt2	SID1 transmembrane family member 2	N	216.959	421.089		3049.24	4362.86	3565.42	639.14	883.781	845.935
D3ZES7	Plxna4	Plexin A4	N				7219.39	8537.08	8151.07	1421.36	708.388	1271.92
D3ZEY4	Dgkq	Diacylglycerol kinase theta	N	1024.33	1442.95	1921.38	2466.43	3498.81	3393.09	2002.5	1722.78	2133.65
D3ZHV2	Macf1	Microtubule-actin cross-linking factor 1	N	2796.9	4457.06	5406.73	29982.5	30526.3	31335.4	11848	14737.3	12752
D3ZJP6	Myo10	Unconventional myosin-X	N	7316.61	10461.7	11595.7	81564.2	84511.4	82753	31197	46342.5	35783
D3ZJR7	Dsc2	Desmocollin 2	N	907.633	1477.47	1114.91	115919	121731	108374	34604.4	23354.9	20386.4
D3ZM39	Dsg1	Desmoglein 1	N	3185.63	12084.6	2717.68	6029.72	3050.34	9753.53	4297.8	14749.7	2840.59
D3ZNF5	Tmem63c	Calcium permeable stress-gated cation channel 1	N				1301.11	1474.14	1451.4	436.265
D3ZPX4	Plxna3	Plexin-A3	N	2470.4	4187.17	2599	53241	59802.6	56302.4	9904.73	10488.3	8185.86
D3ZQ55	Jph1	Junctophilin	N	637.977	1893.26	1871.41	2820.65	2173.87	2318.7	1280.83	1432.06	1167.27
D3ZSI8	Pip5k1a	Phosphatidylinositol 4-phosphate 5-kinase type-1 alpha	N	461.048		249.107	8361.13	6982.54	6837.82	1709.12	2467.86	2145.84
D3ZTI3	Cdh24	Cadherin 24	N				23718.7	23720.6	23323.1	7611.03	6280.77	3716.09
D3ZTJ0	Rp2	Protein XRP2	N	1407.62	1919.15	1593.79	17773.7	17013.8	17495.5	9623.67	12343.8	10627.9
D3ZTV3	Flrt2	Leucine-rich repeat transmembrane protein FLRT2	N				42580	48420.6	44293.2	4953.16	4375.88	3688.39
D3ZUF1	Lypd6b	LY6/PLAUR domain-containing 6B	N				537.656	878.693	615.327
D3ZUI5	Cobl	Protein cordon-bleu	N			421.044	4708.06	4069.22	4690.58	1634.24	1846.11	1902.44
D3ZWP6	Plxna2	Plexin A2	N		295.007	2652.62	33529.4	34867.6	31183.9	5342.74	4833.68	3707.01
D3ZWZ9	Gpr107	Protein GPR107	N	619.285	702.359	730.279	1102.72	1133.11	962.621	1081.59	959.787	1168.96
D3ZZX1	Inpp5a	Inositol polyphosphate-5-phosphatase A	N			490.809	5584.39	4471.43	5058.82	1632.4	2050.18	1391.92
D4A1R8	Cpne1	Copine-1	N	6648.9	6631.91	9042.91	41361.8	42262.1	48798.5	12137.4	14913.9	16682.5
D4A208	Srgap2	SLIT-ROBO Rho GTPase-activating protein 2	N	1549.12	1470.35	1786.41	13888.8	15078.4	13122	5996.5	8675.49	7015.7
D4A229	Prkd3	Serine/threonine-protein kinase	N	723.115	1079.34	952.874	3572.15	5687.72	4931.43	983.521	1725.91	1412.8
D4A2F2	Pard6b	Par-6 family cell polarity regulator beta	N				3443.85	3302.93	2920.41	1047.12	1276.09	863.46
D4A3N4	Adcy1	Adenylate cyclase type 1	N				1483.06	1952.07	2103.07	214.009	613.022
D4A5F1	Pkd2	Polycystin 2, transient receptor potential cation channel	N	974.734	1466.05	1190.34	7065.89	6511.43	5853.08	2014.47	2283.84	2588.53
D4A6D8	Lrrtm1	Leucine-rich repeat transmembrane neuronal protein 1	Y				32665	35981.9	32635.9	6404.54	4736.45	3563.28
D4A6F2	Lynx1	Ly6/neurotoxin 1	N				12211	14477.5	11917.1	1967.23	1907.39
D4A6L0	Gpr158	Probable G-protein coupled receptor 158	N	1331.31	2045.44	1751.66	42369.2	41187.8	37706.4	9387.01	7788.12	6222.94
D4A734	Slc16a12	Monocarboxylate transporter 12	N			444.836	6606.11	8279.53	5602.97	1937.88	1513.54	661.549
D4A740	Il17ra	Interleukin 17 receptor A	N	340.531			20464.4	23322.3	19880.9	3063.64	2585.42	2438.54
D4A758	Lrrc8b	Leucine-rich repeat-containing 8 VRAC subunit B	N	534.358	939.362	1169.46	9552.22	8662.45	9314.97	2332.77	2488.91	2396.02
D4A7P2	Lrrtm2	Leucine-rich repeat transmembrane neuronal protein 2	N				5238.47	5480.25	6184.52	1394.29	1080.27
D4AA47	Atp8b1	Phospholipid-transporting ATPase IC	N	2958.57	3487.51	3014.59	60992.8	68715.8	62499.8	10988.6	12693.4	12072
D4AC13	Lgr5	Leucine-rich repeat-containing G-protein coupled receptor 5	N	1136.13	1208.22	1724.24	2846.91	4282.38	3674.37	1954.83		1208.22
D4ACM8	Fzd7	Frizzled class receptor 7	N				6423.16	5301.19	4633.21	1285.06	1121.51	640.177
D4ACN8	Plgrkt	Plasminogen receptor (KT)	N	355.114	1038.74	837.263	6695.74	6742.02	5652.88	2530.62	2458.06	2088.72
E9PTA2	Trpm2	Transient receptor potential cation channel subfamily M member 2	N				1294.38	1922.85	1614.42	711.851		300.081
E9PTG8	Stk10	Serine/threonine-protein kinase 10	N				3394.68	3048.19	3088.54	1166.8	1744.95	1896.04
E9PTT0	Zdhhc17	Palmitoyltransferase ZDHHC17	N	3136.83	4254.08	3847.01	25155.1	28408.6	26058.3	6244.96	7644.98	7137.17
E9PTX9	Slc12a2	Solute carrier family 12 member 2	N	2474.16	3014.02	3460.77	126569	142140	132531	28681.4	35135.7	29303.6
F1LMI3	Cdh3	Cadherin 3	N				9081.28	11770.1	11160.9	4310.5	2742.21	2885.14
F1LN06;F1LNW0;F1LRU8;F1LSG7	Fgfr2	Fibroblast growth factor receptor	N				20815.7		20672.6	4293.11	2378.06
F1LQP8	Cdh6	Cadherin-6	Y	307.003	435.902	308.857	331060	458264	424393	57962.3	43180.2	34315.6
F1LR10	Lima1	LIM domain and actin-binding protein 1	N	585.147	1135.72	809.444	6520.47	6010.86	5823.16	2118.57	2873.61	2066.19
F1LR98	Cdh10	Cadherin 10	N				3202.79	3778.55	3388.35	890.214		159.465
F1LTZ5	Enpp4	Bis(5'-adenosyl)-triphosphatase	N		583.383		31353.2	35096.5	28439.6	3403.24	2742.47	2183.08
F1LW30	Unc5d	Netrin receptor UNC5D	N				3586.9	3320.81	2675.13	952.42	735.307	773.265
F1LYQ8	Farp1	FERM, ARHGEF and pleckstrin domain-containing protein 1	N	7191.95	7592.89	7802.28	88592.6	91985.3	97015.9	32456.9	47918.1	42334
F1LYX9	Dsg2	Desmoglein 2	N	834.241	1819.38	1329.02	476057	508584	446326	69238.4	48064.9	33607.8
F1M067	Slc26a11	Solute carrier family 26 member 11	N				204.009	373.016	523.021
F1M1A2	Cdh12	Cadherin 12	N				3311.15	5490.21	4045.2	989.046	514.024	479.023
F1M386	Rapgef2	Rap guanine nucleotide exchange factor 2	N	2213.56	3287.3	3717.13	6506.86	6943.32	6926.19	3731.66	4883.74	4495.67
F1M391	Sting1	Stimulator of interferon genes protein	N	310.687	1123.52	623.777	3883.28	3604.06	3573.65	998.988	1144.42	1160.64
F1M3J4	Abcc4	ATP-binding cassette subfamily C member 4	N	1640.57	1985.73	2042.57	47413.2	52626.1	52692	10912.1	12985.4	10767.7
F1M775	Diaph1	Protein diaphanous homolog 1	N	1350.34	1339.13	1747.59	10732	10597.4	11786.5	5016.05	6683.87	5692.81
F1M8K0	Dag1	Dystroglycan 1	N	1880.92	2888.62	1563.25	25925.6	28438.5	25605.5	6873.7	6388.2	4838.86
F1MA19	Efna2	Ephrin A2	N				3274.93	3593.86	3204.4	425.368	552.245	422.9
F1MAB2	Elapor1	Endosome-lysosome associated apoptosis and autophagy regulator 1	N	11055.6	11849.3	12638.9	116815	114387	100747	17061	20139.2	17917.6
F1MAB7	Dgki	Diacylglycerol kinase iota	N	2309.91	2117.41	3186.47	9114.52	9017.64	9038.61	3511.76	3363.31	3445.56
F1MAD2	Patj	InaD-like protein	N	421.312		440.042	3533.69	4073.46	4130.38	1117.94	1527.22	1168.67
F1MAH6	Cdh11	Cadherin 11	N			3066.02	11996.8	11908.1	10253.4	2532.49	1646.29	1683.54
G3V6L1	Fzd6	Frizzled-6	N	1428.91	1425.26	1736.76	12879.7	12174.1	10114.4	2697.7	2668.95	2263.69
G3V7D9	Ptger3	Prostaglandin E2 receptor EP3 subtype	N				1689.05	2599.07	2081.07	1011.03	1097.04	683.02
G3V7L1	Utrn	Utrophin	N	1506.84	2445.02	2629.03	42843.8	44115.6	43734.8	16010.4	21042.9	18284.2
G3V875	Gabrq	Gamma-aminobutyric acid A receptor, theta, isoform CRA_b	N	2081.28	2019.36	1739.1	3342.16	3514.81	3901.88	2968.43	3247.02	2696.75
G3V8K2	Gng3	Guanine nucleotide-binding protein subunit gamma	N	569.013	609.013	543.013	6303.16	6283.17	5833.13	2859.07	2968.07	3273.08
G3V8P3	Celsr2	Cadherin EGF LAG seven-pass G-type receptor 2	N		186.681	439.961	70402.5	80220.2	69705.5	14859.7	10824.4	7235.11
G3V928	Lrp1	Prolow-density lipoprotein receptor-related protein 1	Y	2077.34	3530.58	3345.25	217285	237752	208669	24200.3	19501	15006.5
G3V9H8	Ret	Proto-oncogene tyrosine-protein kinase receptor Ret	N			9050.1	23007.7	23028.3	20943.3	4065.63	3678.31	3389.68
G3V9J2	Cdh7	Cadherin 7, type 2	N				8478.97	8227.98	6977.7	1973.68	1733.03	883.993
H1UBN0	Cpne7	Copine-7	N				1326.56	1343.08	933.915		825.204
I6LBX7	Pcdhgb8	Protocadherin gamma b8	N	1319.05	638.53	1378.5	65413.9	69049.4	63065	22641	15561.5	14364.7
M0RAS4	Igsf21	Immunoglobulin superfamily member 21	N				8123.01	8897.39	8542.79	1008.62	1164.08	1592.26
M0RC99	Rab5a	Ras-related protein Rab-5A	N	15243.1	21984.4	25568	347440	322581	351836	79825.2	107299	107935
O08560	Dgkz	Diacylglycerol kinase zeta	N	1587.26	2184.51	2651.06	4310.22	4590.07	4519.34	1829.77	3076.21	2657.08
O08564	Plpp1	Phospholipid phosphatase 1	N	901.212	977.569	941.688	5056.58	3059.37	5236.16	2019.42	1789.55	1909.63
O08565	Cxcr4	C-X-C chemokine receptor type 4	N				2848.05	2560.55	1891.32	351.997	189.998
O08617	Ptprr	Receptor-type tyrosine-protein phosphatase R	N				1001.44	971.087	679.548			200.985
O08662	Pi4ka	Phosphatidylinositol 4-kinase alpha	N	21331.9	33026.2	40092.4	87295.7	89312	92243.8	47567.3	59842.6	55877.2
O08678	Mark1	Serine/threonine-protein kinase MARK1	N	761.414	1126.67	965.107	8203.16	6820.15	7100.16	2017.9	2897.09	1687.69
O08679	Mark2	Serine/threonine-protein kinase MARK2	N	4716.93	6514.35	7850.05	78285.5	76422.4	76628.5	24309.9	33293.3	28857.6
O08721	Unc5a	Netrin receptor UNC5A	N				26091.1	24564.2	22398.2	4651.09	4580.6	4559.6
O08722	Unc5b	Netrin receptor UNC5B	N				646.331	193.215	1178.33
O08839	Bin1	Myc box-dependent-interacting protein 1	N	1231.73	793.013	1714.26	6193.78	5243.77	5845.42	3093.37	4426.56	2866.46
O08873	Madd	MAP kinase-activating death domain protein	N	14112.2	21437.3	20413.4	52503	59765.5	56985.3	21892	30601.6	26547.7
O08962	Kcnh2	Potassium voltage-gated channel subfamily H member 2	N	1623.92	696.544	675.304	8658.92	9231.81	8690.75	2739.38	3548.81	3192.44
O35049	Smpd3	Sphingomyelin phosphodiesterase 3	N	1307.97	1351.39	1506.82	36913.2	32697.9	30412.8	12103.4	14949.4	15889.9
O35112	Alcam	CD166 antigen	Y	5999.49	5367.79	5307.57	3288350	4195670	4033980	487596	361650	244324
O35119	Trpc4	Short transient receptor potential channel 4	N							1107.04
O35158	Cdon	Cell adhesion molecule-related/down-regulated by oncogenes	N				32950.6	36679.9	31575.1	5951.96	4881.16	3789.11
O35274	Ppp1r9b	Neurabin-2	N			267.467	12792.7	11354.7	10842.8	3481.46	4737.2	3446.5
O35346	Ptk2	Focal adhesion kinase 1	N	4844.75	6655.68	8031.92	11840.1	11582.2	12498.8	7528.96	9758.4	8263
O35394	Rabac1	Prenylated Rab acceptor protein 1	N		618.418	583.529	4297.82	3790.29	4685.13	1133.37	1717.83	1369.68
O35413	Sorbs2	Sorbin and SH3 domain-containing protein 2	N	211.522	1332.54	2215.35	8379.72	7119.51	7292.58	2341.07	2944.45	2488.67
O35433	Trpv1	Transient receptor potential cation channel subfamily V member 1	N			1073.03	376.01	867.021	704.016		2357.07	1741.05
O35509	Rab11b	Ras-related protein Rab-11B	N	1289.19	4180.33	2535.69	76210	71672.4	66786	17817.3	20159.6	19563.9
O35547	Acsl4	Long-chain-fatty-acid--CoA ligase 4	N	17150.6	20886.3	22995.9	128923	126121	127250	32134.3	41752	34922.5
O35548	Mmp16	Matrix metalloproteinase-16	N			1175.98	5653.01	6599.53	4777.4	883.192	830.489	806.249
O35763	Msn	Moesin	N	819.009	1031.01	992.008	2278.97	1617.57	2111.59	802.008	1005.16	935.01
O35777	Magt1	Magnesium transporter protein 1	N	4851.96	4655.7	5744.41	24586	25045.6	26882.6	9694.49	14159.9	12931.8
O35796	C1qbp	Complement component 1 Q subcomponent-binding protein, mitochondrial	N	1010.6	1457.62	1939.28	2674.4	2832.34	2761.18	1236.39	2152.87	1602.93
O35799	Hfe	Hereditary hemochromatosis protein homolog	N			126.311	12575.3	13942.6	12181.7	2976.31	2875.26	2052.6
O54698	Slc29a1	Equilibrative nucleoside transporter 1	N		615.945	1342.42	20922	18882.4	16898.7	7173.78	5657.28	4909.69
O54701	Slc24a2	Sodium/potassium/calcium exchanger 2	N			364.468	29033.2	24862.7	22857.8	3641.98	3679.44	3183.94
O54861	Sort1	Sortilin	N		838.144	2363.69	67977.5	70088	61555.5	5186.25	4583.61	3738.09
O54898	Cacna1g	Voltage-dependent T-type calcium channel subunit alpha-1G	N	1132.78	610.5	1417.94	6525.54	6459.46	5904.84	2033.01	1725.08	1289.19
O54902	Slc11a2	Natural resistance-associated macrophage protein 2	N				3759.74	5091.2	4334.31	1276.88	1612.08	974.013
O54922	Exoc7	Exocyst complex component 7	N	873.825	1142.2	1272.69	25738.4	25865.5	25890.9	7053.78	9382	9055.95
O55005	Robo1	Roundabout homolog 1	N	1379.73	1109.58		26233.4	29952.9	26444.6	5687.49	3190.69	2552.32
O55012	Picalm	Phosphatidylinositol-binding clathrin assembly protein	N	1603.73	1846.84	1675.25	9618.52	7756.47	8257.43	4020.89	4462.57	3988.07
O55159	Epcam	Epithelial cell adhesion molecule	N	350.683	2205.7		212917	346764	273932	32942.4	33043.7	21062.5
O55164	Mpdz	Multiple PDZ domain protein	N	279.717	398.059	507.15	2064.9	1973.37	2256.85	754.569	780.272	693.608
O55173	Pdpk1	3-phosphoinositide-dependent protein kinase 1	N	532.815	831.096	1656.44	13963.7	13569.4	14537.3	3659.46	5457.33	4175.55
O70141	Sema6b	Semaphorin-6B	N				15335.2	15170.9	13733.9	4106.67	4928.62	4289.64
O70239	Axin1	Axin-1	N	4031.6	4989.61	5873.76	5530.29	4902.73	5526.08			4200.35
O70247	Slc5a6	Sodium-dependent multivitamin transporter	N			257.356	17405.2	20727.3	18065.4	2196.59	2537.36	1806.01
O70352	Cd82	CD82 antigen	N				20299.9	17125.3	15847.8	8518.35	9550.39	7630.43
O70377	Snap23	Synaptosomal-associated protein 23	N				17764.1	15940.6	15585.4	5318.32	7498.27	6297.95
O70511	Ank3	Ankyrin-3	N	4668.76	6634.65	7869.29	15544.9	15443	15802.5	9991.69	11893.6	10487.9
O70531	Slc26a2	Sulfate transporter	N	2138.7	2557.42	2388.42	38221.3	45932.9	45012.5	12866.1	17502.7	17401.8
O70535	Lifr	Leukemia inhibitory factor receptor	N				2638.97	3472.83	3431.91		302.773	437.572
O70595	Abcb6	ATP-binding cassette sub-family B member 6	N	6346.4	6880.62	7803.61	30139	35432.8	34499.1	10485.7	11943.1	11514.2
O70610	Gjd2	Gap junction delta-2 protein	N	653.889		1149.98	7768.81	7215.45	6247.61	1365.85	2798.85	1779.62
O88278	Celsr3	Cadherin EGF LAG seven-pass G-type receptor 3	N	2394.97	2639.73		10773.7	10969.5	10935.9	2669.95	2617.74	1924.91
O88339	Epn1	Epsin-1	N	176.221	302.093	408.592	3884.73	3751.64	4120.2	1881.84	2143.89	1331.73
O88377	Pip4k2b	Phosphatidylinositol 5-phosphate 4-kinase type-2 beta	N	394.658	350.848	780.031	5126.77	4760.06	4952.72	1947.48	2411.44	2014.12
O88397	Slco1a5	Solute carrier organic anion transporter family member 1A5	N	135.368			1753.95	2582.8	2230.31	1259.47	362.226
O88563	Abcc3	ATP-binding cassette sub-family C member 3	N	3812.29	4035.15	4407.76	61587	69257.1	66016.3	15915.3	18673.8	18485.1
O88767	Park7	Parkinson disease protein 7 homolog	N	5663.81	9282.37	10502.7	12503.5	11656.2	12772.1	7935.78	15259.7	9588.01
O88775	Emb	Embigin	Y	775.039	1464.52	1048.1	311503	341560	306808	46216	39858.2	32021.2
O88788	Alg10b	Putative Dol-P-Glc:Glc(2)Man(9)GlcNAc(2)-PP-Dol alpha-1,2-glucosyltransferase	N	21212.6	21274	18592.6	38581.3	60297.8	60598	44113.3	38740.7	43690.8
O88813	Acsl5	Long-chain-fatty-acid--CoA ligase 5	N	1560.86	1852.25	2400.89	21835	24011.8	24450.7	4408.84	6512.17	5410.77
O88871	Gabbr2	Gamma-aminobutyric acid type B receptor subunit 2	Y	1001.19	1032.86	718.555	99524.8	104541	87461.9	14340.3	11952.4	8312.44
O88917	Adgrl1	Adhesion G protein-coupled receptor L1	N	1430.21	1622.93		36029.6	41342.6	35482.5	5705.67	4621.21	3923.46
P00507	Got2	Aspartate aminotransferase, mitochondrial	N	18026	21945	25114.2	38084.5	34271.7	34996.4	22957.2	26541.2	24622.2
P00787	Ctsb	Cathepsin B	N	503.527	421.024	1003.78	2782.17	2814.69	2296.19	850.078	1139.28	716.769
P01134	Tgfa	Protransforming growth factor alpha	N				2282.06	2152.05	1622.04		236.005
P04218	Cd200	OX-2 membrane glycoprotein	Y	1242.28	2507.6	2069.11	1145380	1096080	935593	112631	97139.7	64779.8
P04764	Eno1	Alpha-enolase	Y	20796.5	22113.4	25040.8	61576.6	70232	67593.3	27518.1	34301.9	32078.9
P04774	Scn1a	Sodium channel protein type 1 subunit alpha	N				926.019		898.02
P04785	P4hb	Protein disulfide-isomerase	Y	16879.7	21112.4	22832.8	246570	232298	231231	84040.8	98740.1	113355
P04897	Gnai2	Guanine nucleotide-binding protein G(i) subunit alpha-2	Y	59765.5	80217.8	78938.2	2168900	2307170	2235770	723130	965049	854519
P05696	Prkca	Protein kinase C alpha type	N	9412.14	12605.2	13698.8	81532.1	86988.4	87619.2	22501.5	30003.4	29611.2
P05714	Rab4a	Ras-related protein Rab-4A	N		1056.58		5776.26	9488.28	9039.32	2086.92	2755.66	2774.77
P06494	Erbb2	Receptor tyrosine-protein kinase erbB-2	N				6800.95	8349.25	8167.26	1161.16	926.164	540.771
P06685	Atp1a1	Sodium/potassium-transporting ATPase subunit alpha-1	Y	55318.6	61366.4	72160.3	1249990	1220410	1202880	410868	504455	470964
P06687	Atp1a3	Sodium/potassium-transporting ATPase subunit alpha-3	N	10146.8	11077.1	13689.9	146564	140708	132408	45784.9	55715.1	51194.9
P07150	Anxa1	Annexin A1	N	345.545	36360.1	599.501	2289.68	1104.85	1164.85	832.483	706.364	627.154
P07154	Ctsl	Procathepsin L	N		409.606	479.825	700.74	1156.74	1769.97	434.804	345.333	821.99
P07174	Ngfr	Tumor necrosis factor receptor superfamily member 16	N	1138.23	1656.1	1711.33	704816	806531	652197	91106.8	64499.8	48864.8
P07314	Ggt1	Glutathione hydrolase 1 proenzyme	N		835.39	618.357	77883.8	75524.6	73667.1	22183.9	20244.7	14596.4
P07323	Eno2	Gamma-enolase	N	35012	54793.5	41834.8	96716.7	109197	88887.4	58044	53820	52127.8
P07340	Atp1b1	Sodium/potassium-transporting ATPase subunit beta-1	Y	19766.5	27983.7	25715.9	4192450	4902490	4563420	643685	481264	352671
P07861	Mme	Neprilysin	N				1257.39	2020.81	2306.89		540.121
P07936	Gap43	Neuromodulin	N	232.008			765.026	227.008	244.009	271.01	255.009	118.004
P08104	Scn3a	Sodium channel protein type 3 subunit alpha	N	574.723	1059.24	1856.53	7538.09	9172.58	8220.93	2132.18	1779.29	1634.6
P08289	Alpl	Alkaline phosphatase, tissue-nonspecific isozyme	N				5065.1	5590.45	3855.22	1239.79	443.065	735.608
P08483	Chrm3	Muscarinic acetylcholine receptor M3	N				773.555	695.1	577.46			325.215
P08592	App	Amyloid-beta precursor protein	Y	4628.51	7361.82	6835.53	336179	344554	344599	61428.8	57877.5	49157.6
P08644	Kras	GTPase KRas	N	9114.21	10382.9	12548.8	145709	149932	137275	56242.8	64342.4	63047.3
P08753	Gnai3	Guanine nucleotide-binding protein G(i) subunit alpha-3	Y	12274.3	14746.9	16933.9	308048	327318	314113	103242	137472	117206
P09215	Prkcd	Protein kinase C delta type	N	7834.64	10584.3	12280.6	49500.3	50884	49243.9	14837.2	19246.8	17003.9
P09216	Prkce	Protein kinase C epsilon type	N	685.687	643.568	1165.98	4203.45	3884.58	4028.1	1931.45	1820.89	1667.66
P09456	Prkar1a	cAMP-dependent protein kinase type I-alpha regulatory subunit	N	3290.88	5890.66	6040.88	58950	58906.8	57836.4	15476.4	19589.8	17694.8
P09606	Glul	Glutamine synthetase	N	13070.3	16285.6	20395.4	64841.6	58133.9	61397.8	22357.8	27954.3	27791.3
P09626	Atp4a	Potassium-transporting ATPase alpha chain 1	N	3060.07		3362.09	45493.1	45131.1		12872.3
P09759	Ephb1	Ephrin type-B receptor 1	N				942.224	1332.13	1718.18
P09760	Fer	Tyrosine-protein kinase Fer	N		1096.54	1305.82	9095.98	8748.91	8626.16	1990.33	2899.13	2289.71
P0C0A9	Svip	Small VCP/p97-interacting protein	N	3720.39	3640.21	4054.22	7999.33	5869.19	7089.64	6380.26	4382.83	5015.29
P0C152	Tmem67	Meckelin	N	2232.01	2400.13	2952.87	42948.3	50564.8	46436.1	7617.45	6318.96	5975.7
P0C1Q3	Lpcat2	Lysophosphatidylcholine acyltransferase 2	N				3588.84	3349.63	3589.66	843.385	1207.12	1340.08
P0C1S9	Daglb	Diacylglycerol lipase-beta	N	638.865	647.38	684.843	6173.33	6791.24	6721.95	1509.17	1837.33	1612.43
P0C1X8	Aak1	AP2-associated protein kinase 1	N	2335.53	3034.26	3573.22	22407.7	19290.7	18394.9	7773.42	10732.8	8820.37
P0C219	Slmap	Sarcolemmal membrane-associated protein	N	1069.29	1330.37	1960.68	17281.8	15556.6	15518.3	3800.59	4308.96	4085.43
P0C548	Pnpla2	Patatin-like phospholipase domain-containing protein 2	N		577.882	523.514	2919.65	3073.35	2809.6	773.608	1009.42	992.033
P0C588	Cnnm4	Metal transporter CNNM4	N	849.88	1062.68	1330.8	18488.6	18992	19230	5110.97	6983.17	6339.91
P0C5H6	Igsf9	Protein turtle homolog A	N				14759.5	17569.7	14840	1700.77	1826.02	1639.32
P0C644	Ppip5k1	Inositol hexakisphosphate and diphosphoinositol-pentakisphosphate kinase 1	N	862.818	1796.18	1485.77	9785.26	9650.18	10176.4	2743.48	3526.69	3469.77
P0C6P5	Arhgef28	Rho guanine nucleotide exchange factor 28	N	281.01			652.023	786.027		463.017	445.016	538.016
P0C6T3	Prr7	Proline-rich protein 7	N				1602.04	2066.04	2217.06	870.019	522.014
P0C8E4	Map3k7	Mitogen-activated protein kinase kinase kinase 7	N	661.12	1235.83	1116.52	6713.6	6792.14	6425.46	2085.32	3220.08	2015.56
P0CC10	Lrrc4b	Leucine-rich repeat-containing protein 4B	Y	3055.85	18480.5	1556.36	215078	259044	237790	35415.4	26344.2	19885.2
P0CE46	Slc30a8	Zinc transporter 8	Y	62462.5	59432.8	74838.1	325365	303050	330509	72534.1	108467	100872
P0CH38	Fbxo45	F-box/SPRY domain-containing protein 1 (Fragment)	N			578.548	3348.94	4840.23	3933.76	586.208	981.911	1213.24
P0DSP1	Sorl1	Sortilin-related receptor	N	1049.61	1290.09	1553.24	73391.4	78040	68970.6	9711.88	7130.59	5723.69
P10608	Adrb2	Beta-2 adrenergic receptor	N		135.585		1825.02	2386.28	2406.83			700.279
P10824	Gnai1	Guanine nucleotide-binding protein G(i) subunit alpha-1	N	1764.85	2418.55	3670.97	55510.2	64942.9	57406.5	19923.5	25234.7	19474.3
P11167	Slc2a1	Solute carrier family 2, facilitated glucose transporter member 1	N	406.724	824.165	586.37	2994.51	5265.58	4883.03	816.431	871.997	1188.71
P11345	Raf1	RAF proto-oncogene serine/threonine-protein kinase	N	2667.05	3370.17	4208.47	30743.7	28405.1	31414.2	8876.98	10666.8	8520.22
P11505	Atp2b1	Plasma membrane calcium-transporting ATPase 1	Y	10926	12994.2	14377.7	257870	282536	274087	93444.8	114649	105056
P11506	Atp2b2	Plasma membrane calcium-transporting ATPase 2	N	3513.98	5936.84	4838.61	55400.2	57019.8	55912.6	20006.7	23759.9	22963
P11530	Dmd	Dystrophin	N				1577.33	1565.31	1780.39	375.282	858.509	648.481
P12336	Slc2a2	Solute carrier family 2, facilitated glucose transporter member 2	N	16718.7	16801.8	20834.6	1482250	2291980	1974230	234675	176143	145182
P12368	Prkar2a	cAMP-dependent protein kinase type II-alpha regulatory subunit	N	1109.6	1337.88	1629.21	13441.6	14550.8	15691	4012.84	6144.43	5613.14
P12369	Prkar2b	cAMP-dependent protein kinase type II-beta regulatory subunit	N	2132.85	2330.6	2703.14	20432.1	17516.5	18470.7	5748.82	8177.79	7295.35
P13265	Gpc3	Glypican-3	N				1423.93	1096.24	1590.64			266.586
P13596	Ncam1	Neural cell adhesion molecule 1	Y	2551.43	2420.3	2850.55	1529840	1684710	1490640	207839	154093	105266
P13638	Atp1b2	Sodium/potassium-transporting ATPase subunit beta-2	N				4104.04	4619.7	4256.49	738.979	618.98
P13852	Prnp	Major prion protein	Y	1045.95	1430.26	1285.77	477117	437930	383999	58535.4	44913.7	26547.6
P14056	Araf	Serine/threonine-protein kinase A-Raf	N	5462.73	6793.34	6792.29	62679.1	58387.4	62213.5	16705	20266	18820
P14270	Pde4d	cAMP-specific 3',5'-cyclic phosphodiesterase 4D	N				2236.83	2114.37	2351.06	423.213	599.537	552.358
P14562	Lamp1	Lysosome-associated membrane glycoprotein 1	Y	2872.21	1825.79	2803.25	107643	95837.6	96086.5	19663.4	20832.5	20094.1
P15127	Insr	Insulin receptor	N	1323.16		1367.44	88549.7	98228.7	89806.7	16340.7	13817.4	11108
P15304	Lipe	Hormone-sensitive lipase	N			694.797	802.993	813.382	910.457	341.279
P15384	Kcna3	Potassium voltage-gated channel subfamily A member 3	N	498.963			6945.55	7881.47	6575.01	1152.85	950.18	662.966
P15385	Kcna4	Potassium voltage-gated channel subfamily A member 4	N				3179.82	3246.86	3461.89	993.375	1251.9	1223.18
P15387	Kcnb1	Potassium voltage-gated channel subfamily B member 1	N	347.654	515.907	707.472	5220.98	4933.71	4414.7	1397.28	1805.32	1482.75
P15684	Anpep	Aminopeptidase N	N				3790.93	4099.07	4190.47	817.508	400.48	600.999
P15791	Camk2d	Calcium/calmodulin-dependent protein kinase type II subunit delta	N	278.971		817.795	8900.94	8719.79	9360.13	2344.17	2801.13	2117.98
P15999	Atp5f1a	ATP synthase subunit alpha, mitochondrial	N	61577.1	87747.8	87114.7	339870	346201	342056	165550	198648	215939
P16310	Ghr	Growth hormone receptor	N				26470.8	25382.5	23970.7	6591.45	5713.17	4302.13
P16573	Ceacam1	Carcinoembryonic antigen-related cell adhesion molecule 1	N				174699	177724	162254	22125.1	18899.2	14205.2
P17046	Lamp2	Lysosome-associated membrane glycoprotein 2	Y	2613.77	2056.43	3147.63	68502.3	113473	112379	36102.4	34314	40398.5
P18163	Acsl1	Long-chain-fatty-acid--CoA ligase 1	N	7207.69	9690.87	10878.4	103558	105332	110913	24352.9	29375.1	26735.2
P18266	Gsk3b	Glycogen synthase kinase-3 beta	N	3296.47	4292.98	5665.65	26288.8	25686.2	28079.8	8392.39	9534.86	10109.2
P18484	Ap2a2	AP-2 complex subunit alpha-2	N	7866.91	10482.8	12381.4	29933.4	31733.2	32480.5	15880	20297.3	19405.9
P19024	Kcna5	Potassium voltage-gated channel subfamily A member 5	N				1740.05	1196.03	1169.03
P19332	Mapt	Microtubule-associated protein tau	N	749.501	793.827	1413.52	6088.1	5986.07	6036.71	1999.89	3756.65	2061.77
P19491	Gria2	Glutamate receptor 2	N				992.411	894.194	971.025
P20171	Hras	GTPase HRas	N		763.357	666.008	17067.1	16336.8	15659.2	4860.51	7397.71	5218.93
P20272	Cnr1	Cannabinoid receptor 1	N			179.394	2864.52	3173.39	2537.84	474.167
P20417	Ptpn1	Tyrosine-protein phosphatase non-receptor type 1	N	1756.66	2112.37	2588.33	33427.1	32614.1	33041.4	6908.78	8492.4	7315.35
P20786	Pdgfra	Platelet-derived growth factor receptor alpha	N				9563.96	10263.2	9271.35	1795.71	1511.21	1028.03
P21588	Nt5e	5'-nucleotidase	N	9298.67			81915.6	87918.8	87863.2	10155.2	9041.13	6461.83
P22002	Cacna1c	Voltage-dependent L-type calcium channel subunit alpha-1C	N	2172.47	2632.38	2695.3	23570	20938.7	19573.3	7098.42	7007.67	6054.69
P22273	Il6r	Interleukin-6 receptor subunit alpha	N				2600.31	2845.01	2121.74		451.867
P22734	Comt	Catechol O-methyltransferase	N	3260.26	3176.23	4534.65	44356.5	43376.7	44571.8	9572.02	11423.4	9415.79
P22909	Adra2a	Alpha-2A adrenergic receptor	N	1158.68	1313.75	1474.18	41484	38058.8	33856.9	7360.87	6532.44	5874.66
P22934	Tnfrsf1a	Tumor necrosis factor receptor superfamily member 1A	N				1676.41	1638.29	2085.52
P23377	Furin	Furin	N	219.268	533.516	365.107	4209.51	4457.45	4570.38	1177.91	1299.06	878.293
P23385	Grm1	Metabotropic glutamate receptor 1	N		585.015	779.02	976.023				397.009	753.018
P23514	Copb1	Coatomer subunit beta	Y	67609.6	82612.2	97054.2	164903	179536	190792	67067.9	89792.5	87794.1
P23576	Gabra2	Gamma-aminobutyric acid receptor subunit alpha-2	N				2624.69	2607.84	2688.96		1039.66	640.442
P23897	Gucy2c	Guanylyl cyclase C	N	2135.03	2400.99	2234.83	66216.9	75566.7	71208.4	12619.8	14102.9	11561
P24062	Igf1r	Insulin-like growth factor 1 receptor	Y	1390.9	1909.76	1726.93	445212	482627	443687	74844	67716.4	49527.8
P24942	Slc1a3	Excitatory amino acid transporter 1	N		304.842	629.818	1354.54	1352.07	1064.51	312.527	488.737	510.32
P25304	Agrn	Agrin	N	438.422	603.728	796.657	9461.35	12297.3	13008.6	2404.58	2615.37	2037.68
P26342	Tgfbr3	Transforming growth factor beta receptor type 3	N				18569.6	18916.5	18276.1	2879.92	3657.05	2808.85
P26431	Slc9a1	Sodium/hydrogen exchanger 1	N	1052.19	1450.02	1427.75	132149	163276	133383	18614.3	17495.8	13240.4
P26453	Bsg	Basigin	N	684.979	830.18	1475.74	17792.8	20125.3	17334.9	4238.05	4053.34	3836.17
P26817	Grk2	Beta-adrenergic receptor kinase 1	N	2498.9	3185.21	3823.44	16943.4	16875.9	16993.8	4784.49	7490.25	5859.97
P26824	F2r	Proteinase-activated receptor 1	N				3098.91	3175.68	2593.74	508.004	288.001	257.001
P27139	Ca2	Carbonic anhydrase 2	N	859.02	894.02	1023.03
P27274	Cd59	CD59 glycoprotein	N	2899.18	3226.22	2850.52	35723.4	38601.6	37156.5	8346.12	5233.48	4949.11
P27791	Prkaca	cAMP-dependent protein kinase catalytic subunit alpha	N	1758.57	1607.59	1499.83	7722.67	7223.1	7468.63	3362.95	4037.31	4298.4
P28471	Gabra4	Gamma-aminobutyric acid receptor subunit alpha-4	N				10119.5	10905.1	9872.27	4470.55	3687.47	3169.18
P28570	Slc6a8	Sodium- and chloride-dependent creatine transporter 1	N	1813.26	1427.1	1577.49	28238.7	31587.1	29515.2	7348.87	7708.47	7260.5
P28572	Slc6a9	Sodium- and chloride-dependent glycine transporter 1	N	586.623	912.801	915.558	41203.3	44019.2	47607.7	7247.24	4842.27	4218.75
P28648	Cd63	CD63 antigen	Y	998.22	615.88	966.243	28313.6	28230.9	25798.4	4357.56	6745.92	6378.6
P29066	Arrb1	Beta-arrestin-1	N	306.921	502.015	1307.61	1285.74	1643.83	1628.89	773.611	547.255	460.24
P29067	Arrb2	Beta-arrestin-2	N	1661.89	1638.84	3034.6	7115.6	6151.19	6018.57	2324.09	2622.42	3100.71
P29321	Epha8	Ephrin type-A receptor 8 (Fragment)	N		616.135		7726.63	9098.48	7565.48	1899.28	1377.71	1339.77
P30551	Cckar	Cholecystokinin receptor type A	N				1912.47	1446.58	1578.36	855.683	1389.48	753.355
P30680	Sstr2	Somatostatin receptor type 2	N		604.263	1015.27	42249.5	51205.9	41222.4	8147.09	7188.7	4404.82
P30823	Slc7a1	High affinity cationic amino acid transporter 1	N	1811.07	2929.81	2891.26	72925.1	95616.3	91601.1	20147.8	21022.8	18598.5
P30936	Sstr3	Somatostatin receptor type 3	N				868.025	974.032	981.032		74.0028
P30938	Sstr5	Somatostatin receptor type 5	N				1253.04	1764.06	1246.04	481.014
P31000	Vim	Vimentin	N	349.209			2315.49	1614.89	869.63	597.727	572.02	355.637
P31016	Dlg4	Disks large homolog 4	N				3618.02	4659.27	3525.84	1309.2	1848.5	1423.96
P31430	Dpep1	Dipeptidase 1	N				6279.45	7244.98	6405.15	1953.15	1715.01	1514.15
P31596	Slc1a2	Excitatory amino acid transporter 2	N				2488.43	2052.22	1901.28		902.392	1055.42
P31643	Slc6a6	Sodium- and chloride-dependent taurine transporter	N	3263.35	2742.35	3974.66	74228.7	74938.4	65553.6	13957.2	15429.3	14228.6
P31977	Ezr	Ezrin	N	6195.87	8382.58	10351.3	20749.5	19334.3	18702.8	10728.8	14923.4	11586.2
P32215	Adcyap1r1	Pituitary adenylate cyclase-activating polypeptide type I receptor	N	88.0024			3410.1	2725.08	3280.1	878.024	1044.03	940.029
P32301	Glp1r	Glucagon-like peptide 1 receptor	N			402.652	2774.19	4835.66	4869.89	538.524	610.638	740.44
P32577	Csk	Tyrosine-protein kinase CSK	N	2146.32	3280.35	3370.9	17840	19796.1	19397.3	5183.62	6346.84	6095.49
P32736	Opcml	Opioid-binding protein/cell adhesion molecule	N				3636.79	5169.15	3951.04	487.028	783.246
P32851	Stx1a	Syntaxin-1A	N	813.086	414.84	1162.37	44606.6	41267.6	39719.5	12349.5	16022.4	12903.1
P34058	Hsp90ab1	Heat shock protein HSP 90-beta	N	77695.3	89837.8	107935	395279	359879	411042	178971	226433	192468
P34980	Ptger3	Prostaglandin E2 receptor EP3 subtype	N		237.302	284.167	8472.66	8589.07	6261.45	4165.7	2874.11	2141.4
P35233	Ptpn2	Tyrosine-protein phosphatase non-receptor type 2	N	6214.33	7235.94	8021.56	19998.8	23492.1	23707.1	6399.22	9172.33	9353.17
P35280	Rab8a	Ras-related protein Rab-8A	N	1595.83	832.501	818.31	10735.8	11589.1	11245.6	4647.07	4331.77	4756.43
P35286	Rab13	Ras-related protein Rab-13	N	1109.53	839.014	1020.24	3464.84	3987.98	3110.83	1602.96	1778.66	1379.09
P35353	Crhr1	Corticotropin-releasing factor receptor 1	N	1913.7	1776.97	1991.42	281545	290739	275822	33850.7	39291.5	17432.6
P35465	Pak1	Serine/threonine-protein kinase PAK 1	N	371.245			1739.17	983.502	1354.36	944.154	734.201	343.634
P35525	Clcn2	Chloride channel protein 2	N	49321.6	35156		71823.8	63714.1	49949.5	51317.4	41397.7	46083.4
P35559	Ide	Insulin-degrading enzyme	N	8321.73	9333.3	10709.8	22188.8	21811.3	22222.2	13084.2	16640.1	15450.9
P35739	Ntrk1	High affinity nerve growth factor receptor	N	349.197	300.445		8048.53	10552.5	10869.7	1336.18	1354.54	1292.09
P35952	Ldlr	Low-density lipoprotein receptor	N	1138.24	1579.24	1143.12	132424	140241	117536	16229.3	12773.4	9950.58
P36860	Ralb	Ras-related protein Ral-B	N	671.21	706.611	1048.51	35125.9	28314.6	26805.4	13246.2	14798.4	12725.8
P37136	Ache	Acetylcholinesterase	N				1388.04	2139.08	2140.07		237.007
P38444	Acvr2a	Activin receptor type-2A	N	922.216			28263.3	35784	32586.5	6620.17	4597.53	4990.35
P38445	Acvr2b	Activin receptor type-2B	N				3151.54	3239.61	3032.63	506.057		368.23
P38983	Rpsa	40S ribosomal protein SA	N	7757.74	9389.71	11139.5	67747.4	85101.1	81630.8	18710.6	24425.3	18909.9
P39052	Dnm2	Dynamin-2	N	5524.46	7594.51	9490.66	31121.1	32057.9	32919.6	14821.4	18811.4	18086.9
P40146	Adcy8	Adenylate cyclase type 8	N	360.076			2034.11	1815.24	1499.14	555.883	449.495	660.352
P40190	Il6st	Interleukin-6 receptor subunit beta	N	398.51		578.789	52629.2	55943.3	48853.4	8286.91	6074.37	4423.03
P40748	Syt3	Synaptotagmin-3	N				5005.62	4895.62	5284.91	848.072	1044.34	1081.33
P41350;P51638	Cav1;Cav3	Caveolin-1	N			1247.04						1291.04
P42264	Grik3	Glutamate receptor ionotropic, kainate 3	N				12041.6	13003.2	11960.3	2135.05	1541.13	1525.47
P42893	Ece1	Endothelin-converting enzyme 1	N	468.874	1302.23	3425.81	169962	196399	162207	18130.5	15807.3	13171.9
P43219	Gipr	Gastric inhibitory polypeptide receptor	N	291.675	195.768	350.999	41862.1	44994.3	43604.4	6216.19	5267.55	2984.78
P43245	Abcb1	ATP-dependent translocase ABCB1	N	926.331			3761.16	3099.79	2918.66	866.368	1742.71	956.442
P43322	Nrg1	Pro-neuregulin-1, membrane-bound isoform	N					759.019	839.026
P43427	Slc2a5	Solute carrier family 2, facilitated glucose transporter member 5	N		606.022		6861.22	9911.35	8450.26	2298.06	2051.07	1385.04
P46101	Dpp6	Dipeptidyl aminopeptidase-like protein 6	N		1232.67	1325.76	95664.2	105578	92175.4	12249.3	9815.19	7903.6
P46933	Apbb1	Amyloid beta precursor protein binding family B member 1	N	446.349	1091.38	1463.13	6923.53	7725.93	7998.15	1769.08	2783.18	2235.3
P47196	Akt1	RAC-alpha serine/threonine-protein kinase	N	1003.6	1406.95	1822.17	13456.5	13178.9	14142.1	3500.34	4844.63	4245.08
P47197	Akt2	RAC-beta serine/threonine-protein kinase	N	194.524	1200.7	729.849	4864.76	5047.96	4906.65	1664.81	1811.22	1435.85
P47820	Ace	Angiotensin-converting enzyme	N				17638	17365.8	15044.2	2211.47	2235.65	1462.71
P48442	Casr	Extracellular calcium-sensing receptor	N	1611.83		1824.63	102542	114730	98604.3	17074.2	12384.4	10802.7
P48768	Slc8a2	Sodium/calcium exchanger 2	N		529.032	1473.29	9617.74	8963.1	8400.21	2509.56	3279.98	2335.87
P49134	Itgb1	Integrin beta-1	Y	3366.13	3851.85	3488.64	1834870	1873610	1770990	249116	227159	157209
P49651	P2ry1	P2Y purinoceptor 1	N	2451.12	3023.03	2674.95	23178.1	29215.2	24827.9	5984.01	9245.17	6842.26
P49803	Rgs7	Regulator of G-protein signaling 7	N				6392.86	7086.76	7352.27	2310.11	3277.53	3027.74
P50545	Hck	Tyrosine-protein kinase HCK	N				3133.11	2543.08	3067.09	542.018	760.023	879.031
P51146	Rab4b	Ras-related protein Rab-4B	N	1349.95	1645.38	1917.15	12740.3	13041.8	13321.3	3402.19	4321.82	3374.49
P51158	Rab28	Ras-related protein Rab-28	N		881.741	851.433	5754.05	5990.73	5733.09	1286.01	1868.82	1326.91
P51577	P2rx4	P2X purinoceptor 4	N	1372.6	1588.4	1818.4	19509.2	19653.8	17947.5	3611.64	3806.15	4337.38
P51635	Akr1a1	Aldo-keto reductase family 1 member A1	N	5994.12	9001.85	9841.65	21007.1	20942.5	22033.9	10482.4	11929.6	11980.1
P51792	Clcn3	H(+)/Cl(-) exchange transporter 3	N	1632.79	1876.74	2254.3	20573.5	18788	19127.2	3057.85	4064.25	3871.62
P51796	Clcn5	H(+)/Cl(-) exchange transporter 5	N	1243.06	1764.66	1752.56	10131.5	10866.8	11761.2	2123.29	2776.99	2800.29
P51907	Slc1a1	Excitatory amino acid transporter 3	N			203.008	242.009	737.026	1457.05	234.01		402.019
P52500	Grpr	Gastrin-releasing peptide receptor	N				970.034	2213.07		191.006
P52796	Efnb1	Ephrin-B1	Y			245.357	117473	147580	130071	15115.6	11837.8	8031
P52925	Hmgb2	High mobility group protein B2	N	3058.9	4393.24	5313.01	25001.8	21692.7	23359.4	7649.11	10175.9	7941.1
P53042	Ppp5c	Serine/threonine-protein phosphatase 5	N	1647.98	2065.52	2522.2	5416.66	5777.92	5552.19	2459.96	3311.79	2730.94
P53987	Slc16a1	Monocarboxylate transporter 1	N	2335.93	2604.74	2889.61	13405.9	13530.7	11848	6577.47	5989.29	7016.62
P54282	Cacna1a	Voltage-dependent P/Q-type calcium channel subunit alpha-1A	N	918.201	1196.61	1224.44	5819.76	6502.31	7640.04	2707.32	2505.41	2415.4
P54313	Gnb2	Guanine nucleotide-binding protein G(I)/G(S)/G(T) subunit beta-2	N	58893.5	76758.8	86005.4	371032	386655	348555	145639	202020	192313
P54757	Epha5	Ephrin type-A receptor 5	N				23006.4	26477.1	25196.3	3490.23	2791.08	2331.25
P54759	Epha7	Ephrin type-A receptor 7	N	1095.08	1927.65	1301.28	211134	237525	216032	24873.7	18081.4	15744.4
P54921	Napa	Alpha-soluble NSF attachment protein	N	1911.55	2376.2	1914.28	10319.7	9870.37	11248.4	4636.28	4321.56	3352.89
P55043	Rrad	GTP-binding protein RAD	N	379.021	535.025	682.03	901.043	657.034	1179.05		629.027	496.022
P55161	Nckap1	Nck-associated protein 1	N	7214.14	10223.6	14178.6	34373.7	31746.2	31977.2	14386.5	20353.7	18882.6
P55280	Cdh6	Cadherin-6	N				321969	338409	310445	60372.5	46393	30203.2
P55314	C8b	Complement component C8 beta chain	N				1273.04	388.011	1192.04	318.009	343.011
P55926	Asic1	Acid-sensing ion channel 1	N	447.634		319.885	3362.26	3612.5	3137.85	358.72	642.865	669.996
P56558	Ogt	UDP-N-acetylglucosamine--peptide N-acetylglucosaminyltransferase 110 kDa subunit	N	5280.53	6239.73	7130.24	53772.5	50375.3	54651.8	14518.1	18483.2	15825.6
P56819	Bace1	Beta-secretase 1	N	675.776		859.641	5404.3	6563.17	5150.05	1404.79	1108.59	972.939
P57097	Mertk	Tyrosine-protein kinase Mer	N				3823.57	5717.84	4411.5	701.401	680.718
P58365	Cdh23	Cadherin-23	N	603.113		1225.29	940.125	1511.99	1315.83	656.768	638.453	901.265
P59215	Gnao1	Guanine nucleotide-binding protein G(o) subunit alpha	Y	23242.6	34066.1	31162.8	725478	755560	727730	233647	319552	266005
P59241	Aurka	Aurora kinase A	N			1646.66	2227.84	2015.52	1902.72	532.432	524.614	546.328
P59798	Selenok	Selenoprotein K	N	335.405	381.621		9587.23	7663.38	7986.08	2324.13	2259.94	1427.22
P60123	Ruvbl1	RuvB-like 1	N	3826.82	4179.8	5035.8	130456	128676	125611	26086.8	34809.4	30971.7
P60203	Plp1	Myelin proteolipid protein	N	1032.88	1382.47		1239.46	2006.16	1728.66	1243.57	1187.38	1346.34
P60570	Panx1	Pannexin-1	N				2760.63	3259.92	2773.19	771.503	948.618	845.05
P60756	Mdga2	MAM domain-containing glycosylphosphatidylinositol anchor protein 2	N					145.007	520.021
P60881	Snap25	Synaptosomal-associated protein 25	N	1134.67	1095.23	1011.55	18492.4	19401.7	19392.9	7230.04	8374.85	8499.86
P60905	Dnajc5	DnaJ homolog subfamily C member 5	N	512.487		536.555	34565.8	29825.5	36422.3	5858.82	7115.52	7263.92
P61078	Ube2d3	Ubiquitin-conjugating enzyme E2 D3	N	20956.6	21616.2	22847.9	35348.7	49043.3	59377.3	20557	23203.3	23915
P61214	Arl4a	ADP-ribosylation factor-like protein 4A	N				956.041	1450.05	897.034	468.018	348.015
P61589	Rhoa	Transforming protein RhoA	N	1656.7	1369.62	1968.6	26492.5	25967.4	25985.6	4378.19	6552.24	5804.07
P62332	Arf6	ADP-ribosylation factor 6	N	3525.23	4667.88	4270.66	46891.5	54982.9	52134.5	15261.5	18570.6	19709
P62483	Kcnab2	Voltage-gated potassium channel subunit beta-2	N	1936.62			57639.6	62604.8	60834.6	14050	18445.2	13850.5
P62630	Eef1a1	Elongation factor 1-alpha 1	Y	119386	148109	167463	977847	1255830	1227670	289243	386297	349385
P62744	Ap2s1	AP-2 complex subunit sigma	N	8526.28	9490.2	8034.84	27842.5	30885.3	27392.9	15588.2	19297.1	15151.6
P62747	Rhob	Rho-related GTP-binding protein RhoB	Y	1650.54	1821.44	1900.62	29954.8	33328.1	31468.3	9811.99	13631.5	12971.3
P62815	Atp6v1b2	V-type proton ATPase subunit B, brain isoform	N	13286.5	17085.7	19892.2	130765	131865	126346	33348.7	40557.9	37239.8
P62824	Rab3c	Ras-related protein Rab-3C	N	44642.7	52879.2	60554.1	446900	427238	430640	106370	142202	130197
P62836	Rap1a	Ras-related protein Rap-1A	Y	647.03	1232.15	1046.7	27963.2	22927	21418.8	7739.78	10120.7	10819.2
P62944	Ap2b1	AP-2 complex subunit beta	N	11593.9	14740.8	16861.8	65595.3	64586.3	66260.6	29070.7	37299.5	34768.6
P62957	Cacng7	Voltage-dependent calcium channel gamma-7 subunit	N				2505.08	2048.07	2894.1			765.026
P63012	Rab3a	Ras-related protein Rab-3A	N	37575.4	47771.7	44900.3	363181	401992	395222	103578	124320	117306
P63018	Hspa8	Heat shock cognate 71 kDa protein	Y	50582.2	68661.5	70815.6	377530	346283	355300	157153	205930	178932
P63025	Vamp3	Vesicle-associated membrane protein 3	N	215.602	490.807	264.42	4695.32	4888.53	4777.24	1525.02	1479.7	1119.27
P63035	Cyth2	Cytohesin-2	N	2131.65	2838.2	2010.66	22782.3	23346.2	22312.9	5375.85	9307.76	6522.62
P63079	Gabrb3	Gamma-aminobutyric acid receptor subunit beta-3	N	1421.37		498.654	17849.4	22152.6	21340.9	4268.08	3307.46	2796.83
P63095	Gnas	Guanine nucleotide-binding protein G(s) subunit alpha isoforms short	N	2810.11	3529.11	5097.2	112632	116332	117948	32542.4	48785.6	42094.4
P63245	Rack1	Receptor of activated protein C kinase 1	Y	74849.5	96260.5	118954	174833	162489	163726	58819.3	88122.4	82843.1
P63322	Rala	Ras-related protein Ral-A	N	3016.98	4380.87	4052.34	128472	143579	141372	53187	68286.1	65621
P63329	Ppp3ca	Protein phosphatase 3 catalytic subunit alpha	N	4017.02	4859.58	4774.15	28336.5	24803.9	25092.8	10665.6	14530.8	13279.7
P67779	Phb1	Prohibitin 1	Y	10935.4	16244.7	17036.7	208828	204022	197395	39590.7	43762.4	38200.1
P68182	Prkacb	cAMP-dependent protein kinase catalytic subunit beta	N	472.201	720.216		4309.42	5664.38	5573.59	1461.42	1078.22	1251.86
P69682	Necap1	Adaptin ear-binding coat-associated protein 1	N	1996.64	3180.77	3366.89	6499.16	5694.23	5993.59	3275.3	2920.53	2692.04
P70470	Lypla1	Acyl-protein thioesterase 1	N	2432.02	3784.12	3806.69	12439.5	9888.24	11498.2	4187.42	5904.81	3571.07
P70478	Apc	Adenomatous polyposis coli protein	N	459.98	849.513	1049.67	13615.8	13382.9	13610.8	4051.44	5693.63	4052.68
P70498	Pld2	Phospholipase D2	N	513.545	1006.8	1266.6	4602.11	4158.06	4593.75	1544.71	1938.56	1379.1
P70500	Cdipt	CDP-diacylglycerol--inositol 3-phosphatidyltransferase	N	44593.6	44641.5	37523.8	54655.1	82667.5	78183	49761.4	50979	58781.1
P70549	Slc8a3	Sodium/calcium exchanger 3	N				1236.77	1466.22	1291.4	182.949	657.344
P70550	Rab8b	Ras-related protein Rab-8B	N				1669.61	1366.75	1506.28	705.88	740.735	783.166
P70585	Gpr19	Probable G-protein coupled receptor 19	N				1502.04	1864.04	2304.06	595.012
P70600	Ptk2b	Protein-tyrosine kinase 2-beta	N	2164.73	3017.69	3202.4	9262.42	9147.58	9472.4	3294.12	4220.11	3959.51
P70617	Ninj1	Ninjurin-1	N				2834.05		2382.05
P70705	Atp7a	Copper-transporting ATPase 1	N	694.351	801.07	763.283	8965.19	8550.86	8874.37	2451.32	2580.04	2400.41
P80202	Acvr1b	Activin receptor type-1B	N				25235.4	29733.2	23638.4	4143.65	2898.15	3794.73
P80204	Tgfbr1	TGF-beta receptor type-1	N	716.468	503.042	942.887	22949.8	22873.9	20054.6	4038.39	4342.83	4493.18
P81128	Arhgap35	Rho GTPase-activating protein 35	N	6332.51	7746.5	9444.5	29644.2	31156.7	31782.4	13516.5	17330	15954.7
P81377	Prkar1b	cAMP-dependent protein kinase type I-beta regulatory subunit	N	618.451	1107.94	1319.05	14414.5	15753.2	14133.2	3971.81	4251.58	3677.77
P82471	Gnaq	Guanine nucleotide-binding protein G(q) subunit alpha	N	10712.3	12563.6	12701.6	538438	539173	558651	168122	246778	215200
P82995	Hsp90aa1	Heat shock protein HSP 90-alpha	N	30717.4	37326.2	42256.3	130305	129202	131998	78427.6	98945	87856.1
P84060	Dtnb	Dystrobrevin beta	N	1774.75	3370.04	1742.45	17824.4	15962.6	16828.4	5922.73	9453.64	7352.94
P84092	Ap2m1	AP-2 complex subunit mu	N	78796.2	87616	88045.1	138592	139141	140408	85233.2	116019	118856
P84889	Vangl2	Vang-like protein 2	N		680.39	1123.67	7758.21	7586.1	7590.58	2889.85	3158.51	3126.02
P84903	Stim1	Stromal interaction molecule 1	N	503.837	1454.69	1514.91	29766.1	28128.9	27836.5	7621.18	8010.73	8381.88
P85171	Mdga1	MAM domain-containing glycosylphosphatidylinositol anchor protein 1	N				2750.92	3205.18	2808.4	927.353	1916.42
P85972	Vcl	Vinculin	N	1074.61	2110.28	1366.75	13744.5	13750.3	13858.2	8376.46	9655.75	8693.66
P97544	Plpp3	Phospholipid phosphatase 3	N			471.076	5918.96	6362.97	5570.86	1789.27	2011.85	2113.66
P97546	Nptn	Neuroplastin	N	873.321	1949.7	1076.46	95521.9	93669.3	79774.7	12520.9	11553.2	8112.53
P97570	Pla2g6	85/88 kDa calcium-independent phospholipase A2	N	4339.27	4697.63	5492.65	23471.7	23804.3	24293.3	6731.64	10035.2	8806.49
P97571	Capn1	Calpain-1 catalytic subunit	N	335.008	1782.04	451.014	999.026	723.018	1115.03	432.011	921.022	487.013
P97603	Neo1	Neogenin (Fragment)	Y	1564.44	1240.57	13558.6	601617	676964	601295	92492.6	73030.5	53460.7
P97605	Efna5	Ephrin-A5	N			514.951	5505.82	7018.63	5199.29	1125.87	1343.25	514.325
P97629	Lnpep	Leucyl-cystinyl aminopeptidase	N	2615.33	3807.99	3771.47	327285	344892	299588	29274.1	22441.5	20654.6
P97675	Enpp3	Ectonucleotide pyrophosphatase/phosphodiesterase family member 3	N	701.154	1200.58	1528.9	233920	242773	213685	33315.8	27328.7	17144.9
P97677	Dll1	Delta-like protein 1	N				29608.7	30728.9	27946.1	4380.37	2595.33	2725.27
P97685	Nfasc	Neurofascin	Y	1862.46	2434.99	2225.59	1737640	1944570	1767710	265547	222709	149270
P97686	Nrcam	Neuronal cell adhesion molecule	N	3634.45			263882	336678	274293	50668.7	34675.9	28515.7
P97694	Cyth1	Cytohesin-1	N	696.306	583.484	556.552	1578.32	2498.45	2177.82	454.634	929.853	541.719
P97829	Cd47	Leukocyte surface antigen CD47	N	805.034	1148.05	535.023	26920.1	26992.3	21951.9	6890.29	5002.19	3803.15
P97837	Dlgap2	Disks large-associated protein 2	N				3072.1	3350.12	2901.09	1017.03	1004.03	1476.04
P97838	Dlgap3	Disks large-associated protein 3	N			140.797	1813.45	1856.33	2351.95	752.456	446.425	626.661
P97849	Slc27a1	Long-chain fatty acid transport protein 1	N	9319.34	11009.1	13936.3	30898.7	32496.4	32794.1	9608.77	14133.1	13419
P97879	Grip1	Glutamate receptor-interacting protein 1	N	1329.37	1914.47	2037.13	15611.3	15687.1	15397.9	5041.71	7066.73	5694.83
P97881	Muc13	Mucin-13	N				10516	12300.3	9373.25	1719.98	1971.29	1972.54
P97887	Psen1	Presenilin-1	N	2286.36	1664	3565.82	35434.6	37824.3	32704.6	8212.56	10155.5	9074.43
P97943	Scarb1	Scavenger receptor class B member 1	Y		635.049		138549	169589	154260	34136	27949.4	26389.7
P98158	Lrp2	Low-density lipoprotein receptor-related protein 2	N	543.011	704.017	706.018		54533.1		5616.13	4602.11	4590.11
Q00954	Scn1b	Sodium channel subunit beta-1	N				372.012	977.032	1092.03
Q01062	Pde2a	cGMP-dependent 3',5'-cyclic phosphodiesterase	N				5918.03	5665.34	5874.25	2297.2	2875.05	2722.81
Q01728	Slc8a1	Sodium/calcium exchanger 1	N	1831.26	2424.53	1847.06	117857	121328	104947	24613.1	23527.9	22201.4
Q02294	Cacna1b	Voltage-dependent N-type calcium channel subunit alpha-1B	N	1849.54	2027.63	2488.81	10465.9	11208	10095.3	3890.77	3833.96	3466.91
Q02955	Il1r1	Interleukin-1 receptor type 1	N	620.931	674.535	777.153	233007	274465	250318	34487.8	28151.4	20719.2
Q03114	Cdk5	Cyclin-dependent kinase 5	Y	2747.15	3666.76	5481.29	34395	35231.8	36005.3	7095.31	10224.9	10329.3
Q03343	Adcy6	Adenylate cyclase type 6	N	2663.81	3261.71	3500.28	26957.9	29344.7	27380.4	8152.52	10413.6	9454.89
Q03348	Ptpra	Receptor-type tyrosine-protein phosphatase alpha	N	1752.09	1456.61	1892.57	69969.2	90057.5	79086.2	14402.6	16989.2	15658.4
Q03555	Gphn	Gephyrin	N	1068.35	1603.55	1219.58	9512.98	9502.88	9690.95	3026.03	4218.64	3393.6
Q04400	Adcy5	Adenylate cyclase type 5	N	461.874		1117.78	2587.1	1958.27	2191.86	883.435	629.746	895.637
Q04589	Fgfr1	Fibroblast growth factor receptor 1	N				20209.1	21318.2	19435.8	2635.65	2669.22	1665.68
Q04970	Nras	GTPase NRas	N	737.292	1009.03	695.506	14383.4	14078.6	14375	4140.37	6724.18	5243.03
Q05140	Snap91	Clathrin coat assembly protein AP180	N	1146.86	921.418	1142.57	4559.63	4047.68	4129.64	2262.36	2624.74	1992.71
Q05175	Basp1	Brain acid soluble protein 1	N		1037.35	637.215	86628.6	75998.5	60114.9	38367	56798.8	45571.7
Q05695	L1cam	Neural cell adhesion molecule L1	N			20498.4	60425.6	70201.9	63873.9	7898.08	7234.6	4789.6
Q05764	Add2	Beta-adducin	N	2885.8	3105.76	4090.93	33443.2	32695.2	33259.4	12554.9	16844.4	15552.5
Q06000	Lpl	Lipoprotein lipase	N		1697.91		24833.3	24721.7	26626.4	3946.9	5436.77	4039.51
Q06486	Csnk1d	Casein kinase I isoform delta	N	1274.73	1429.82	1966.12	13351.1	13918	14224.9	4072.65	4288.84	4467.39
Q07008	Notch1	Neurogenic locus notch homolog protein 1	N	323.088		1344.48	33646.2	32728.6	30965.6	7873.67	6851.1	5147.23
Q07009	Capn2	Calpain-2 catalytic subunit	N	4036.44	4955.47	5715.1	26117.9	21654.1	21005.1	9758.93	12004.5	10538.5
Q07014	Lyn	Tyrosine-protein kinase Lyn	N	1100.46	1012.8	1044.12	23500.8	25008.5	25201.5	7321.14	9135.14	9006.65
Q07310	Nrxn3	Neurexin-3	N				5094.19	6013.23	5284.22	1103.04	1128.05	742.028
Q07969	Cd36	Platelet glycoprotein 4	N				3510.08	2979.07	3627.08		907.022
Q08163	Cap1	Adenylyl cyclase-associated protein 1	N	4403.75	5666.7	7366.21	32837.1	30172.9	30776.2	18898.5	23580.4	21508.8
Q08201	Abcb4	Phosphatidylcholine translocator ABCB4	N	394.156	701.549	498.966	10708.1	10969.1	11309.4	3129.55	4264.66	4237.02
Q08406	Cntfr	Ciliary neurotrophic factor receptor subunit alpha	N	1082.75	784.614	1181.8	147672	202794	202876	40616.5	38861	29318.4
Q08463	Fzd1	Frizzled-1	N				5454.75	4439.28	4728.74
Q08464	Fzd2	Frizzled-2	N	917.133	1112.92	903.847	19096.2	23334.1	21103.3	3252.18	2787.09	3059.45
Q08850	Stx4	Syntaxin-4	N		487.953		18731.2	16992.5	16798.9	6270.86	7915.65	7828.48
Q09429	Abcc8	ATP-binding cassette sub-family C member 8	N	11570.5	12870.4	13420.7	80407.5	86000.5	82051	24917.4	30163.3	28505.8
Q0H8B9	Clec2d11	C-type lectin domain family 2 member D11	N				875.03	977.033	1476.05	236.009
Q0KL00	Piezo1	Piezo-type mechanosensitive ion channel component 1	N	508.443	334.432	206.614	855.891	1259.48	1491.41	515.601	385.552	570.361
Q0PMD2	Antxr1	Anthrax toxin receptor 1	N				23265.6	28745	21936.3	2905.49	2702.42	2182.34
Q10743	Adam10	Disintegrin and metalloproteinase domain-containing protein 10	N	6953.92	4490.61	7289.79	273322	289852	242875	60391.1	51107.1	38346.6
Q1HAQ0	Lpcat1	Lysophosphatidylcholine acyltransferase 1	N	841.65	1081.44	931.151	17329.7	16672.6	16369.7	2818.36	3652.45	3717.99
Q1WIM2	Cadm2	Cell adhesion molecule 2	N	359.494			28351.1	29964.1	25564.1	2892.35	3808.25	2433.31
Q1WIM3	Cadm3	Cell adhesion molecule 3	N	357.721	911.827	548.237	223001	277772	234233	25751.4	17181.4	14122.1
Q2HWF0	Fnbp1l	Formin-binding protein 1-like	N				3331.81	2373.91	3132.98	478.241	1173.3	617.51
Q2LC84	Numb	Protein numb homolog	N		584.411		3539.81	2567.9	2974.73	1124.75	1345.15	469.256
Q2TA63	Tmem147	Transmembrane protein 147	N	423.733	351.849		859.401	1782.65	1600.63	497.4	426.202	968.777
Q2THW7	Zdhhc5	Palmitoyltransferase ZDHHC5	N	3774.7	4432.24	4199.69	30989.5	29972.9	28472.9	11880.6	13999.7	12433.1
Q3C2P8	Spred2	Sprouty-related, EVH1 domain-containing protein 2	N	14846.9		470.04	6404.56	6005.42	5900.96	1915.21	2819.95	1999.61
Q3KR56	Gramd1a	Protein Aster-A	N	914.824	1318.62	1153.02	7125.45	6226.15	5678.53	1772.28	2203.78	1729.26
Q3KRC4	Gprc5c	G-protein coupled receptor family C group 5 member C	N	1136.78	1420.88	1515.92	17714.3	14344.1	13909.6	3910.92	4841.1	3290.96
Q45R42	Lrrc4	Leucine-rich repeat-containing protein 4	N				57165	64156	59486.4	6390.17	6305.18	3753.1
Q498D6	Fgfr4	Fibroblast growth factor receptor 4	N	410.119	2093.79	503.54	147462	158437	126818	24883.9	15411.7	13635.5
Q498S8	Fzd8	Frizzled-8	N				2915.02	3401.47	2555.63	372.462
Q498T9	Lrrc8c	Volume-regulated anion channel subunit LRRC8C	N	281.458		439.437	3686.01	4088.29	4577.79	825.914	893.752	838.48
Q499Q7	Cldn8	Claudin	N				1324.06	1684.08	1313.06			465.018
Q499R4	Yrdc	Threonylcarbamoyl-AMP synthase	N		323.114		1277.82	2117.49	2138.19	709.339	1201.19	1032.18
Q4FZT0	Stoml2	Stomatin-like protein 2, mitochondrial	N	2916.05	3167.95	3004.65	19755.3	16220.7	16975.5	7560.84	8099.8	9106.44
Q4G017	Nisch	Nischarin	N	4400.31	6570.19	6387	26377.8	26994	28322.9	9145.07	10957.9	10980.8
Q4JM44	Sgms2	Phosphatidylcholine:ceramide cholinephosphotransferase 2	N			235.007	2001.06	2418.08	2653.07		1923.05
Q4QQS1	Tmem184a	Transmembrane protein 184A	N		4729.39	6269.62	7031.62	5639.22	6902.11	1144.04	2596.14	4510.69
Q4TU93	Mrc2	C-type mannose receptor 2	N	1102.44	1271.66	1254.35	94439.4	102215	88653.6	7396.98	6337.14	5305.96
Q4V887	Slc39a6	Zinc transporter ZIP6	N	2599.8	3933.64	3740.51	179655	192087	167965	36840	33929.8	25751.4
Q4V888	Pip4p2	Type 2 phosphatidylinositol 4,5-bisphosphate 4-phosphatase	N	2905.06	3254.64	4041.89	30855.5	28069.8	25783.7	8075.08	8458.47	8008.96
Q4V8B2	Dcun1d3	DCN1-like protein 3	N				2183.44	2823.68	2017.97	1216.64	1567.53	1298.65
Q4V8H8	Ehd2	EH domain-containing protein 2	N				3642.43	3973.2	2868.23		1021.7	567.093
Q4V8I7	Lrrc8a	Volume-regulated anion channel subunit LRRC8A	N	730.867	681.753	310.473	69944.1	75185.6	64424.6	11432.3	10287.7	7753.75
Q505J9	Atad1	Outer mitochondrial transmembrane helix translocase	N	1835.17	2543.57	3308.64	64377.6	58149.7	56535.4	11518	12233.5	12780.2
Q53AQ4	Tmub1	Transmembrane and ubiquitin-like domain-containing protein 1	N	748.021	1419.04	1018.03	16210.5	30593.8	25851.7	5514.14	4297.11	3090.09
Q562C9	Adi1	Acireductone dioxygenase	N	3784.77	6209.61	7689.29	20368.6	24631	20669.8	7980.87	10227.4	9929.65
Q566E6	Cd300lf	CMRF35-like molecule 1	N				4555.06	3677.61	3736.13	391.293
Q569C0	Tmem100	Transmembrane protein 100	N				7260.69	5546.43	3901.07	1690.79	1123.13	2366.63
Q5BJY4	Josd1	Josephin-1	N				2285.09	1642.4	2160.51	436.765	997.889	561.253
Q5BK85	Tmed1	Transmembrane emp24 domain-containing protein 1	N	1019.85	747.547	1541.7	5505.32	5295.11	5707.9	2605.99	2396.31	2288.38
Q5CZZ9	Pip5k1b	Phosphatidylinositol 4-phosphate 5-kinase type-1 beta	N				4871	5156.26	5227.85	1134.86	1658.69	1220.81
Q5DWV2	Cdh7	Cadherin-7	N				27717.7	29573	25789.7	6496.57	3929.52	3462.5
Q5EB77	Rab18	Ras-related protein Rab-18	N	14163.9	14904.8	19176.4	81623.9	76668.2	73098	19229.8	25793.1	25409.2
Q5EGZ1	Ace2	Angiotensin-converting enzyme 2	N						282.011
Q5FVF4	Tm7sf3	Transmembrane 7 superfamily member 3	N	1874.33	1498.41	1783.64	6048.68	5402.04	3833.14	2960.86	2612.06	2661.15
Q5FVG2	Epb41l5	Band 4.1-like protein 5	N	840.734	3406.11	1098.65	4698.67	6662.12	6366.52	2206.79	2542.8	2586.8
Q5FVH4	Aktip	AKT-interacting protein	N	279.4	191.558		1808.05	2288.22	2486.81	910.723	1484.68	601.19
Q5FVN1	Stbd1	Starch-binding domain-containing protein 1	N			605.993	3072.36	1987.06	3023.82		928.99
Q5GH56	Xkr7	XK-related protein 7	N	3657.88	3765.69	4775.15	54507	54805.4	52224.8	16666.5	21404.3	17345.5
Q5GH57	Xkr6	XK-related protein 6	N					264.013
Q5GH59	Xkr4	XK-related protein 4	N		428.788	389.568	3209.21	3435.26	2736.95	1257.55	1374.9	874.507
Q5HZE2	Tmem120a	Ion channel TACAN	N	8749.84	8396.99	10258.6	33809.6	34383.6	36285	10705.4	13510.4	14056.1
Q5HZW5	Cd320	CD320 antigen	N				10329.6	12234.7	11378.5	1649.14	1091.95
Q5I0H3	Sumo1	Small ubiquitin-related modifier 1	N	1204.2	1333.62	2019.17	5117.07	3530.26	4946.14	2252.57	2998.86	2188.09
Q5I6B8	Pip5k1c	Phosphatidylinositol 4-phosphate 5-kinase type-1 gamma	N		516.836		23994.7	22662.1	24878.9	6521.79	10992.9	7708.71
Q5M7U5	Rab19	Ras-related protein Rab-19	N				1602.56	1894.25	1973.36		352.961
Q5M807	Rnf5	E3 ubiquitin-protein ligase RNF5	N		244.007		3341.08	2130.06	2595.07	523.015
Q5M834	Dtnbp1	Dysbindin	N				1087.29	1002.84	868.833	332.795	324.589	277.374
Q5M836	Lysmd3	LysM and putative peptidoglycan-binding domain-containing protein 3	N				1382.65	1560.11	1309.1	371.095
Q5M848	Orai1	Calcium release-activated calcium channel protein 1	N				1177.04	1630.06	1245.04		407.017
Q5PPM8	Pip4p1	Type 1 phosphatidylinositol 4,5-bisphosphate 4-phosphatase	N	713.822	853.833	786.414	9577.53	12092	11804.2	2902.79	3488.84	3306.71
Q5PQL3	Sppl2b	Signal peptide peptidase-like 2B	N				663.013	873.018	587.01		332.006
Q5PQL7	Itm2c	Integral membrane protein 2C	N		300.829	238.865	13801.5	16578.8	14697.1	3864.41	3570.51	3092.04
Q5PQV5	Tpbg	Trophoblast glycoprotein	N				23998.2	24143.9	21886.7	3432.17	2717.59	1842.97
Q5PT50	Slc10a7	Sodium/bile acid cotransporter 7	N			357.009	605.015	670.017	670.017	291.007	633.015	342.009
Q5RK27	Slc12a7	Solute carrier family 12 member 7	N	710.241	1292.8	1139.08	27731.2	31217.3	29936.7	8380.1	10784.3	9754.44
Q5RKJ1	Maea	E3 ubiquitin-protein transferase MAEA	N	846.987	475.205	403.387	9403.18	8339.48	8188.05	2136.55	2547.02	1593.19
Q5SGD7	Cnksr3	Connector enhancer of kinase suppressor of ras 3	N		204.039	738.13	4187.89	4541.7	4751.5	1219.41	596.309	1156.57
Q5U2P1	Cnnm2	Metal transporter CNNM2	N	1333.93	1668.17	2081.17	32326.4	30601.9	29675.4	14715.6	15895.9	12908.6
Q5U2R3	Frmd8	FERM domain-containing protein 8	N	309.01	366.299	381.449	3928.24	4561.53	3927.96	1357.76	1862.89	1547.92
Q5U2T1	Tlcd1	TLC domain-containing protein 1	N	5696.23	5466.25	4523.71	17822.6	19976.9	20881.3	8111.48	8381.38	7609.88
Q5U2W6	Ptov1	Prostate tumor-overexpressed gene 1 protein homolog	N	985.985	1168.54	1333.01	5574	5482.74	5040.41	1691.21	2333.82	2039.45
Q5U2X5	Tnk2	Activated CDC42 kinase 1	N	588.28	446.638	700.642	2968.62	2352.94	2813.8	859.509	973.033	1002.67
Q5U2Y3	Mpp7	MAGUK p55 subfamily member 7	N	991.896	1215.61	1086.12	26284.6	24487	25146.9	10285.4	13616.8	10927.9
Q5U302	Ctnna1	Catenin (Cadherin associated protein), alpha 1	N	1081.07	1545.98	1517.61	40183.5	41327.8	41556.1	21663.4	27493.8	25161.8
Q5U308	Lrrc8d	Volume-regulated anion channel subunit LRRC8D	N	761.555	378.07	497.84	58182.8	69471.2	64476	7613.92	7144.74	5093.63
Q5U316	Rab35	Ras-related protein Rab-35	N	7153.05	6267.88	6353.04	44662.2	48877.9	46051.2	18327.7	24350.5	16701.5
Q5U3Y7	Tmem97	Sigma intracellular receptor 2	N				10270.3	6004.15	5134.12			2047.05
Q5XHY1	Carmil3	Capping protein, Arp2/3 and myosin-I linker protein 3	N	232.849			1741.45	1351.77	1754.44	471.278	366.269	443.637
Q5XI52	Vezt	Vezatin	N	1375.65	1686.21	1783.1	23550.5	21047.5	21433.2	5620.87	6270.95	5989.37
Q5XIE8	Itm2b	Integral membrane protein 2B	N				16164.2	17058.5	14762.1	5819.33	4439.03	3741.74
Q5XIH7	Phb2	Prohibitin-2	N	1641.72	4039.46	2064.66	78179.2	74484.6	77448.6	18950.5	20078.2	15319
Q5XIJ5	Abhd17a	Alpha/beta hydrolase domain-containing protein 17A	N	387.004		606.514	7982.61	7122.36	6814.13	1649.9	1509.83	1742.02
Q5XIL2	Pi4k2b	Phosphatidylinositol 4-kinase type 2-beta	N				6461.6	6812.18	7140.16	1366.31	1926.95	1762.79
Q5XIM7	Kars1	Lysine--tRNA ligase	N	5038.24	5439.98	7225.95	22414.1	20760.9	23587.2	9414.78	12009.1	10233.8
Q5XIQ4	Mgrn1	E3 ubiquitin-protein ligase MGRN1	N		1047.06	1493.8	9818.9	11833.7	10646	2835.03	2952.46	2964.2
Q5XIS9	Prkd2	Serine/threonine-protein kinase D2	N	708.204	919.507	1179.9	5361.7	5499.51	5389.35	954.608	1682.75	1556.75
Q5YLM1	Dagla	Diacylglycerol lipase-alpha	N	758.664	571.153	561.882	5896.05	5785.7	6470.92	1538.01	1674.74	1678.13
Q62634	Slc17a7	Vesicular glutamate transporter 1	N	784.061	685.341	575.135	9798.15	7598.72	7737.75	2313.16	2452.06	2390.06
Q62636	Rap1b	Ras-related protein Rap-1b	N	22944.4	29026.8	32386.7	316163	327780	331376	93131.1	131834	116407
Q62640	Grid1	Glutamate receptor ionotropic, delta-1	N	590.526	961.556	1054.6	27370.9	29964.6	27846.8	4379.92	4378.62	3889.16
Q62656	Ptprz1	Receptor-type tyrosine-protein phosphatase zeta	N	2229.66	2911.09	3268.14	325288	389292	332092	65191.3	52412.6	50456.9
Q62682	Cntn3	Contactin-3	N				17514.4	20786.8	19678.1	2855.9	2230.49	1521.97
Q62696	Dlg1	Disks large homolog 1	N	1724.7	1845.98	2160.93	65762.8	62935.3	62970.6	26832.3	35522.5	30893
Q62718	Ntm	Neurotrimin	N				35079.7	41694.8	36353	5797.56	4906.42	3345.41
Q62720	Slc30a1	Zinc transporter 1	N	2255.34	2353.01	2655.87	16613.7	15654.3	15043.1	5619.19	6659.68	5630.57
Q62745	Cd81	CD81 antigen	N	624.805	973.6	885.84	149253	189825	166809	29464.2	26232.8	22543.5
Q62747	Syt7	Synaptotagmin-7	N	2656.19	3073.02	3713.8	41287.2	40659.9	39572	12033.3	13296.8	14258.6
Q62769	Unc13b	Protein unc-13 homolog B	N	842.178	848.989	1011.46	4121.44	4133.77	4063.1	1394.82	1889.45	1827.4
Q62784	Inpp4a	Inositol polyphosphate-4-phosphatase type I A	N	1587.55	1879.67	2194.48	9984.55	10485.7	10865.4	4468.63	4407.94	4088.42
Q62796	Ralbp1	RalA-binding protein 1	N		793.163	356.442	15246.3	14375.3	14183.3	5377.1	7411.4	6775.68
Q62813	Lsamp	Limbic system-associated membrane protein	N	186			5085.51	4219.79	4136.95	700.999	748
Q62833	Grk5	G protein-coupled receptor kinase 5	N	250.273	516.155	687.504	7641.81	8913.05	8120.74	2161.14	3460.57	2717.99
Q62844	Fyn	Tyrosine-protein kinase Fyn	N	272.264	1004.01	922.326	13951	14885.5	13630.7	4079.52	5629.92	4969.56
Q62847	Add3	Gamma-adducin	N	2932.08	4152.78	5315.23	21898.2	20698.6	20879.8	8507.91	11269.4	10343.2
Q62866	Slc19a1	Reduced folate transporter	N		271.985		2338.47	3384.56	2793.81	576.871	469.931	512.718
Q62868	Rock2	Rho-associated protein kinase 2	N	4140.41	5601.88	6355.11	32610.8	32364.2	30883.7	14709.6	18608.5	14638.4
Q62888	Nlgn2	Neuroligin-2	N		416.97		45960	58099.1	52402.2	5224.39	4478.7	3696.56
Q62889	Nlgn3	Neuroligin-3	N				13930.3	16282.1	15202.3	1235.55	1547.33	1596.33
Q62897	Kcnd3	Potassium voltage-gated channel subfamily D member 3	N		387.441		3506.36	2819.58	3977.66	1244.58	1404.6	777.885
Q62915	Cask	Peripheral plasma membrane protein CASK	N	6793.55	7639.02	9218.01	85875.8	87845.3	85720.4	36314.6	51681.9	45908.3
Q62940	Nedd4	E3 ubiquitin-protein ligase NEDD4	N	4883.92	6713.22	8247.14	26251	29206.6	29373.3	8998.25	12882.3	10291.1
Q62959	Lepr	Leptin receptor	N				156.004	290.01				228.007
Q62976	Kcnma1	Calcium-activated potassium channel subunit alpha-1	N	4261.1	5261.72	4889.93	16142.1	16159.9	15905.9	7208.21	7842.66	8039.16
Q62997	Gfra1	GDNF family receptor alpha-1	N				913.603	963.48	1003.13
Q63016	Slc7a5	Large neutral amino acids transporter small subunit 1	N	9501.09	9747.46	11072.6	205083	234833	208067	42454.9	41991.3	32704.9
Q63028	Add1	Alpha-adducin	N	3200.42	4272.15	4899.74	56704.8	52755.3	53141.4	19771.8	27051.1	23269.7
Q63081	Pdia6	Protein disulfide-isomerase A6	Y	13554.4	18416.3	18626.8	212589	228492	223346	105814	135087	172468
Q63099	Kcnb2	Potassium voltage-gated channel subfamily B member 2	N				2266.25	2816.73	2997.7	494.609	972.207	530.898
Q63120	Abcc2	ATP-binding cassette sub-family C member 2	N			551.24	3301.38	3496.71	1238.84	1015.6	1377.51	1024.33
Q63149	Cdh4	Cadherin-4 (Fragment)	N		913.228	339.713	755730	832524	780496	115525	86350.5	68436.8
Q63175	Serinc5	Serine incorporator 5	N				3768.1	3421.1	3769.1	930.026	1149.03	1095.03
Q63198	Cntn1	Contactin-1	Y	1625.22	1708.96	1447.02	1190370	1253420	1130190	211673	161427	109542
Q63199	Fas	Tumor necrosis factor receptor superfamily member 6	N				11752.7	13336.4	10853.5	1841.02	1444.23	1063.43
Q63210	Gna12	Guanine nucleotide-binding protein subunit alpha-12	N				1702.56	2478.98	2358.36	491.854	1064.58	1082.84
Q63226	Grid2	Glutamate receptor ionotropic, delta-2	N				564.017	824.028	652.019	173.005
Q63257	Il4r	Interleukin-4 receptor subunit alpha	N				2491.98	3056.47	3203.39	592.419	376.429	523.865
Q63259	Ptprn	Receptor-type tyrosine-protein phosphatase-like N	N	1210.8	1600.68	1341.76	29459.5	28009.7	27692.3	6003.68	8013.59	7633.17
Q63315	Cdh22	Cadherin-22	N				10989	12137.6	10926.4	2997.66	1409.26	2790.65
Q63355	Myo1c	Unconventional myosin-Ic	N	13119.7	16453.1	20986.7	184977	196262	194747	63367.9	82851.7	76181.5
Q63364	Pja2	E3 ubiquitin-protein ligase Praja-2	N		213.948		1078.88	1384.4	1820.72	1014.84	472.112	504.151
Q63372	Nrxn1	Neurexin-1	N	1008.3	1004.78	1065.32	245271	285275	258799	52105.9	39835.5	28084.3
Q63377	Atp1b3	Sodium/potassium-transporting ATPase subunit beta-3	Y	1109.76	1246.65	1479.44	238336	382699	331314	50742.4	33133.8	25506.4
Q63406	Mcf2l	Guanine nucleotide exchange factor DBS	N	914.214	1150.57	1248.05	10358.5	12169.6	10989.9	2672.62	3235.52	3261.18
Q63418	Pcdh3	Protocadherin-3	N					1981.55	2156.78	392.922	406.918
Q63433	Pkn1	Serine/threonine-protein kinase N1	N	1143.02	1576.89	2055.94	9123.24	10175.3	10708.8	3427.85	3835.78	3944.48
Q63474	Ddr1	Epithelial discoidin domain-containing receptor 1	N	463.536	709.53	940.861	75249.4	80926	72225.7	10625.3	8642.45	6607.08
Q63475	Ptprn2	Receptor-type tyrosine-protein phosphatase N2	N	5814.18	7873.88	7828.36	68718.3	66883.5	64024.4	17141	21278	19258.9
Q63488	Slc20a2	Sodium-dependent phosphate transporter 2	N	1014.88	1421.75	1351.11	13177.3	13094.5	10508.2	3556.46	3473.97	3668.13
Q63493	Cd1d	Antigen-presenting glycoprotein CD1d	N				15057.2	17753.2	17000.1	2464.77	2884.67	2519.57
Q63584	Tmed10	Transmembrane emp24 domain-containing protein 10	Y	29772	43411.2	50908.8	190242	187765	171748	86795.2	96529.6	102837
Q63604	Ntrk2	BDNF/NT-3 growth factors receptor	N				40666.1	42073.4	38517.7	5973.24	4883.81	3362.32
Q63622	Dlg2	Disks large homolog 2	N		464.077		2717.46	2357.66	2189.15	1837.31	1388.08	939.009
Q63644	Rock1	Rho-associated protein kinase 1	N	3791.11	4694.82	5295.82	28652.5	27549.5	28885.8	12998.7	17303.5	15445.8
Q63648	Nf2	Merlin (Fragment)	N	400.047	477.651	515.315	2212.71	2775.54	2482.6	1004.29	1208.05	1415.51
Q63713	Rasa2	Ras GTPase-activating protein 2	N	1566.53	1895.9	2163.18	6935.37	6391.38	6526.41	2393.39	3766.22	3260.32
Q63722	Jag1	Protein jagged-1	N				14425.5	12018.8	10887.9	2402.69	1730.45	1463.93
Q63768	Crk	Adapter molecule crk	N			221.948	1231.23	1371.89	690.218	296.319	411.36	339.08
Q63803	Gnas	Guanine nucleotide-binding protein G(s) subunit alpha isoforms XLas	N	2229.74	2426.01	2451.34	61720.6	77600.2	73073.3	22794.9	28763.6	26636.3
Q63881	Kcnd2	Potassium voltage-gated channel subfamily D member 2	N	144.306	323.289	302.897	1736.4	1867.37	1622.28	551.494	439.34	657.387
Q63941	Rab3b	Ras-related protein Rab-3B	N	844.957	1169.17	1032.5	4863.03	8182.71	6951.93	1790.69	1579.93	1447.37
Q63942	Rab3d	GTP-binding protein Rab-3D	N	22582.1	20505.6	20209.5	174455	159766	160161	46010.7	58622.2	51750
Q64017	Gpr176	Probable G-protein coupled receptor 176	N					2808.14	2055.09	276.012	513.021
Q641Z6	Ehd1	EH domain-containing protein 1	N	2206.81	2706.91	2931.53	88665	91866.8	93727.3	29334	40509.1	34423.6
Q64259	Vhl	von Hippel-Lindau disease tumor suppressor	N	121.011		140.012	3751.56	3261.16	2770.76	2635.23	1778.38	1249.11
Q642B0	Gpc4	Glypican 4	Y	2936.11	2225.63	2519.84	1473220	1593380	1443890	235660	186387	119644
Q64303	Pak2	Serine/threonine-protein kinase PAK 2	N	2071.83	1828.72	2103.96	19869	18663.8	20591.5	5388.74	6651.94	5704.48
Q64537	Capns1	Calpain small subunit 1	N	331.697	622.005	903.276	8771.13	7819.14	7488.21	2610.93	3503.89	3405.27
Q64541	Atp1a4	Sodium/potassium-transporting ATPase subunit alpha-4	N	1280.04	5416.32	2297.3	40060.1	41494.3	59201.1	15776.1	12532.7	13488.9
Q64542	Atp2b4	Plasma membrane calcium-transporting ATPase 4	N	1369.46	1783.45	1693.42	29117.6	30644.1	28811.9	9455.51	11623.1	8882.31
Q64568	Atp2b3	Plasma membrane calcium-transporting ATPase 3	N	2174.36	2900.65	3380.92	40182	36105.7	36094.6	11128.8	14916.5	14538.9
Q64605	Ptprs	Receptor-type tyrosine-protein phosphatase S	N	423.736	1430.47	3284.3	42973.7	50945.3	44342.6	9353.35	8062.81	6220.39
Q64649	Phka1	Phosphorylase b kinase regulatory subunit alpha, skeletal muscle isoform	N	1823.35	2135.19	2172.06	14965.8	13950.1	14343.7	4068.25	4612.42	4447.25
Q66H28	Pacc1	Proton-activated chloride channel	Y	1230.69	1091.88	1015.71	183845	257346	221595	28005.3	26537.1	20439.8
Q66H42	Lypd1	Ly6/PLAUR domain-containing protein 1	N				7647.27	6525.25	6209.21		521.016	523.019
Q66H62	Cyld	Ubiquitin carboxyl-terminal hydrolase CYLD	N	1078.91	1449.87	2010.88	9393.12	8050.4	9457.98	2528.07	3364.79	3290.2
Q66HE2	Slc16a13	Monocarboxylate transporter 13	N		393.921	380.216	1266.52	1183.12	1429.37	546.447		273.202
Q66HL2	Cttn	Src substrate cortactin	N	3300.67	4544.44	4469.89	30119.8	26468.2	27843.7	15425.4	18655.1	17220.3
Q66HR0	Slc12a9	Solute carrier family 12 member 9	N	3625	3709.86	5062.85	25855.1	31400.1	31118.1	8351.44	9234.31	10045.4
Q68FQ2	Jam3	Junctional adhesion molecule C	N				128213	128722	112550	17012.8	17770.6	11633.7
Q69BT7	Trappc4	Trafficking protein particle complex subunit 4	N	650.866	1171.58	680.652	5526.09	6441.33	6681.2	1664.42	2175.95	2219.42
Q6AXQ4	Mtm1	Myotubularin	N	360.93	727.621		1855.52	2969.56	1757.57		1094.31	873.526
Q6AY17	Abhd17b	Alpha/beta hydrolase domain-containing protein 17B	N	713.705	855.142	1443.21	22762.4	19949	19361.1	4574.48	6236.61	5032.35
Q6AY19	Coq8b	Atypical kinase COQ8B, mitochondrial	N		784.63	1072.09	3575.64	3667.44	3966.33	1304.65	1610.97	2062.72
Q6AY41	Tmem30a	Cell cycle control protein 50A	N			387.625	12583.7	12907.1	11546.6	2809.48	2940.42	2610.36
Q6AY92	Slc44a3	Choline transporter-like protein 3	N		426.47	457.504	4181.94	4801.36	3173.84	673.742	1034.62	851.939
Q6AYC2	Irgm	Immunity-related GTPase family M protein	N	590.392	930.402	1231.01	19614.4	19673.5	19033.7	3892.34	5326.66	4401.08
Q6AYF1	Mapkap1	Target of rapamycin complex 2 subunit MAPKAP1	N	965.014	1366.36	1710.1	9969.17	11238.5	11100.9	2771.7	4343.19	3326.77
Q6AYF7	Mfap3	Microfibril-associated glycoprotein 3	N				2627.03	3174.59	2883.25	261.123	300.517	323.529
Q6AYP5	Cadm1	Cell adhesion molecule 1	N				313394	411493	342254	27721.3	24480.2	16559.2
Q6AZ61	Lmbrd1	Lysosomal cobalamin transport escort protein LMBD1	N				1195.04	1294.04	1463.05
Q6IE75	Bace2	Beta-secretase 2	N	1916.87	1855.56	1699.47	14874.5	19072.3	15931.6	4051.36	3841.09	3680.55
Q6IMF3	Krt1	Keratin, type II cytoskeletal 1	N	553790	1073610	431707	625109	530486	1237030	389080	1284510	403660
Q6IMY1	Mtus1	Microtubule-associated tumor suppressor 1 homolog	N				549.017	596.013	631.016	288.008	319.008
Q6JE36	Ndrg1	Protein NDRG1	N	7811.55	9460.2	10430.9	70457	62669.3	68845.8	32195.5	38190.5	38707.8
Q6JP77	Akap7	A-kinase anchor protein 7 isoforms delta and gamma	N	553.148	798.576	687.962	1329.4	1623.63	2497.1	1058.43	1666.58	937.172
Q6MG61	Clic1	Chloride intracellular channel protein 1	N	7632.72	10605.7	10303.9	41163.8	38462.8	37663	13239.6	16870.8	16251.4
Q6MG71	Slc44a4	Choline transporter-like protein 4	N			701.333	16339.3	18643.2	17212.9	3058.56	2151.03	1911.44
Q6MG82	Prrt1	Proline-rich transmembrane protein 1	N	1078.26	1346.16	2243.29	76438.4	73946.1	69006.4	13182.5	16077	13772.5
Q6NX65	Pdcd10	Programmed cell death protein 10	N			414.328	6493.2	6676.9	6977.54	2572.83	3953.13	3426.66
Q6P689	Wls	Protein wntless homolog	N	1255.92	811.902	1369.23	3354.38	3902.88	3543.08	1473.45	1543.43	1729.25
Q6P6S2	Slc39a11	Zinc transporter ZIP11	N	1182.03		626.015	7956.19	6148.16	5249.13	1507.03	2572.06	1838.04
Q6P730	Dab2ip	Disabled homolog 2-interacting protein	N	511.833	765.112	620.542	8548.31	10115.4	10275.6	2666.57	3765.97	3318.23
Q6P767	Pttg1ip	Pituitary tumor-transforming gene 1 protein-interacting protein	N	1164.64	1769.99	2372.39	21546.8	18911.2	17656.4	3926.01	4732.73	4175.34
Q6P791	Lamtor1	Ragulator complex protein LAMTOR1	N	1747.9	2230.16	3831.66	50422.6	44912.1	43964.5	7510.85	9365.54	10320.8
Q6PCU2	Atp6v1e1	V-type proton ATPase subunit E 1	N	1326.98	2048.25	2532.07	55688.8	53240.1	53139	12970.9	14232.6	14896.5
Q6Q0N0	Clstn1	Calsyntenin-1	N				4402.28	4401.2	3939.02		1019.51	627.471
Q6Q629	Dpp10	Inactive dipeptidyl peptidase 10	N				20307.1	23326.3	21206.5	2868.63	2522.22	1500.68
Q6QBQ4	Plscr3	Phospholipid scramblase 3	N	1468.59	1262.65	887.499	60803.4	60010.4	61461.6	15826.9	22890.1	19375.7
Q6RFZ7	Plekhg5	Pleckstrin homology domain-containing family G member 5	N				1768.31	1745.67	1526.02	549.044	879.379	578.612
Q6RUV5	Rac1	Ras-related C3 botulinum toxin substrate 1	Y	26652.3	30166	35400.2	164072	150009	152577	63503.7	80541.6	69819
Q6RVG2	Slc4a8	Electroneutral sodium bicarbonate exchanger 1	N	452.087	756.878	987.224	19518.5	19571.6	15511.6	3817.03	4048.93	3659.06
Q6TUD4	Yipf3	Protein YIPF3	N	3762.88	4050.58	4868.02	12432.9	12237.7	13660	5860.24	6967.5	6896.68
Q6WAY2	Plppr1	Phospholipid phosphatase-related protein type 1	N		470.011		6035.15	6828.17	6239.16	1474.04	1349.03	674.018
Q6X936	Kirrel1	Kin of IRRE-like protein 1	N			14607.6	81402.5	85854.5	72497.8	10333.3	8575.21	5631.02
Q6XUX2	Dstyk	Dual serine/threonine and tyrosine protein kinase	N	1190.98	1677.97	1645.45	13337.8	13448.4	13451.9	3432.06	4561.75	3716.19
Q71RP1	Hpse	Heparanase	N	961.638	1153.3	1704.13	5841.73	4777.52	5747.42	2018.87	2735.54	2542.96
Q761X5	Unc5c	Netrin receptor UNC5C	N		3054		26782.1	29886.1	27614.2	5298.5	4107.64	3978.93
Q767H7	Pcdhac2	Cadherin-related neuronal receptor c2	N				9532.83	9856.66	7893.17	2206.18	1944.48	1702.12
Q767I1	Pcdha11	Cadherin-related neuronal receptor 11	N				27394.1	31924.5	29236.9	7390.36	5422.48	6006.06
Q767I6	Pcdha6	Cadherin-related neuronal receptor 6	N		384.709		34677.6	40618	36098.1	10210.1	8291.86	7359.52
Q78EA7	Bmpr1a	Bone morphogenetic protein receptor type-1A	N			476.646	19291.5	19225.9	15809.2	3124.02	2258.11	1909.12
Q78EG7	Ptp4a1	Protein tyrosine phosphatase type IVA 1	N	2027.82	2023.56	1959.77	3747.2	3882.6	2604.64	2059.93	2502.52	3074.26
Q792I0	Lin7c	Protein lin-7 homolog C	N	2804.85	3487.11	4168.75	17775.3	20089.3	18316.4	8842.11	11293.7	9202.27
Q794F9	Slc3a2	4F2 cell-surface antigen heavy chain	Y	2682.51	2507.7	3480.98	331118	457766	431803	62099.3	46969.5	40959.7
Q7TNJ2	Abca7	ATP-binding cassette sub-family A member 7	N	711.407	1037.22	712.823	4865.73	5440.23	5520.34	1632.19	1606.86	1146.44
Q7TNJ4	Amigo2	Amphoterin-induced protein 2	N	581.633			35531.9	41879.9	37316.4	5320.16	3286.6	3440.58
Q7TP36	Shroom2	Protein Shroom2	N	434.664	341.892	1884.97	4436.66	4086.84	4515.37	1514.65	1783.89	1943.21
Q7TP54	Ripor2	Rho family-interacting cell polarization regulator 2	N	1000.91	1841.41	1750.9	1169.93			490.974	1661.72	1356.92
Q7TSE9	Hax1	HCLS1-associated protein X-1	N	1703.31			3823.81	3198.4	4028.14	629.092	809.93	930.496
Q7TT49	Cdc42bpb	Serine/threonine-protein kinase MRCK beta	N	10776.7	15641.6	19138.9	52005.8	50716.3	50328.3	23592.5	32478.6	28558.5
Q80W57	Abcg2	Broad substrate specificity ATP-binding cassette transporter ABCG2	N		147.569		2804	3192.73	3302.99	743.367	950.114	986.458
Q80WD0	Rtn4rl1	Reticulon-4 receptor-like 1	N				23522	27589.3	24899.4	3229.94	3524.3	2371.55
Q80WD1	Rtn4rl2	Reticulon-4 receptor-like 2	N				22869.1	25437.2	23801.8	2768.76	1887.04	1251.87
Q80WE1	Fmr1	Fragile X messenger ribonucleoprotein 1	N	3915.07	4930.09	5146.86	25743.4	23484.6	23794.4	6084.84	8967.16	8599.89
Q80X08	Washc2	WASH complex subunit 2	N	4654.48	5735.95		5473.23	7451.04	6762.97	3846.87	4590.19	3735.98
Q80YN4	Corin	Atrial natriuretic peptide-converting enzyme	N				313.012	715.029
Q80ZD7	Amigo1	Amphoterin-induced protein 1	N				54794.9	53958	47686.3	6614.28	5322.11	3735.85
Q80ZG1	Ric8a	Synembryn-A	N	785.168	738.23	1185.42	6733.6	7619.19	8157.91	2021.03	2722.51	2644.52
Q810W7	Mast1	Microtubule-associated serine/threonine-protein kinase 1	N	14697.7	19315	20648.8	36363.7	38173.6	35744.5	21283.2	24890.3	21942.3
Q811A2	Bst2	Bone marrow stromal antigen 2	N				4145.11	3299.1	4612.14	811.025		1346.03
Q8CF82	Abca5	Cholesterol transporter ABCA5	N	861.884	1681.18	1475.66	16679.5	16590.5	15853.6	3460.44	3799.01	3500.35
Q8CFN2	Cdc42	Cell division control protein 42 homolog	N	15172	15006.3	17852.2	63856.7	65675.3	60709.7	27872.7	31992.5	25535.3
Q8CG09	Abcc1	Multidrug resistance-associated protein 1	N	3359.18	3360.26	4006.85	42618.4	43905.9	44034.1	12972.9	14604.8	14162.5
Q8CHL0	Fzd5	Frizzled-5	N				10008	9314.9	10526.3	1630.96	706.99	889.717
Q8JZQ0	Csf1	Macrophage colony-stimulating factor 1	N			3238.94	2630.33	4294.75	3303.07	716.101	561.176	996.593
Q8K3V3	Adgrg1	Adhesion G-protein coupled receptor G1	N	168.96			7312.96	6789.49	5505.29	576.814	662.274	727.972
Q8K4C8	Fzd9	Frizzled-9	N	451.169	591.667	303.196	5594.14	5171.12	4836.59	663.05	1049.2	799.597
Q8K5A9	Nradd	Death domain-containing membrane protein NRADD	Y	162.619		372.149	93094.1	105307	94684.5	12354.2	9247.75	6673.14
Q8R1R5	Cd99l2	CD99 antigen-like protein 2	N				368139	363378	332577	53892.1	32743	32465.2
Q8R2H2	Itgb3	Integrin beta-3	N		1126.46		8582.92	7622.11	7091.2	1382.35	1442.05	839.6
Q8R3Z7	Ehd4	EH-domain-containing 4	N	692.127	2201.99	1225.68	22114.7	22332.7	23234.5	8238.71	10409.8	9359.96
Q8R491	Ehd3	EH domain-containing protein 3	N		1840.2	1849.29	66193.3	70522	69584.1	19698.6	25998.7	16840.8
Q8R4E1	Itfg1	T-cell immunomodulatory protein	N	239.022			25789.5	26148.3	21961.2	2964.86	2907.49	2229.88
Q8R511	Fnbp1	Formin-binding protein 1	N		466.434		4418.76	3170.42	3467.83	1208.4	1806.3	1307.3
Q8R553	Clstn3	Calsyntenin-3	N				6855.83	7189.37	6741.92	1644.64	1313.67	1467.53
Q8VD52	Pdxp	Chronophin	N	1179.11	2156.46	2504.78	2743.85	2425.56	2900.47	2367.9	3284.77	2460.46
Q8VDA1	Clstn2	Calsyntenin-2	N				5620.03	3955.09	3995.7	1026.67	530.015	599.017
Q8VGC3	Cacnb2	Voltage-dependent L-type calcium channel subunit beta-2	N	538.077	361.229	557.512	11914.5	11446.2	11915.8	3264.73	4155.98	3728.53
Q8VHF0	Mark3	MAP/microtubule affinity-regulating kinase 3	N	5999.1	6456.37	7064.36	68216.1	60947.3	62274.6	20773.5	29301.7	23443
Q8VHW9	Cacng4	Voltage-dependent calcium channel gamma-4 subunit	N				12546.8	12129.3	12995.2	1500.04	1744.05	1051.03
Q8VHZ8	Dscam	Cell adhesion molecule DSCAM	N	2179.12	2565.24	4011.41	5905.79	7859.27	7175.04	1271.34	1113.1	1021.54
Q8VII6	Slc44a1	Choline transporter-like protein 1	Y	4226.16	5373.18	5547.17	92815.3	108227	97181.2	17148.3	16685.5	15440.4
Q91XQ2	Epm2a	Laforin	N				2010.06
Q91XS8	Stk17b	Serine/threonine-protein kinase 17B	N				230.005	413.009	540.012	107.002
Q91XT9	Asah2	Neutral ceramidase	N	324.593		220.878	2864.61	3565.36	2822.78	750.279	742.724	680.833
Q91XU7	Cdhr1	Cadherin-related family member 1	N				1629.33	1953.07	1748.28	398.462	496.296
Q91Y77	Slc16a10	Monocarboxylate transporter 10	N	593.979	619.071	665.425	15088.9	14365	13126.1	2334.86	2374.63	2253.01
Q91ZQ0	Vmp1	Vacuole membrane protein 1	N	4387.18	2919.47	4677.38	21332.5	24029.4	21928.8	8481.19	9062.09	8516.59
Q920E0	F2rl3	Proteinase-activated receptor 4	N		739.019		16896.4	11847.3	35557.9	6359.13	43216.1	9762.24
Q920P6	Ada	Adenosine deaminase	N		1084.04	1171.04	1552.05	1606.05	1481.05	1023.03	1345.04	1227.04
Q920Q0	Palm	Paralemmin-1	N				11676.7	10220.1	9839.04	3439.76	4147.74	4737.11
Q921A2	Slc2a13	Proton myo-inositol cotransporter	N			1018.84	7591.17	8010.54	7164.43	1657.11	1811.33	1839.53
Q923U9	Slc40a1	Solute carrier family 40 member 1	N	2873.03	3139.61	3053.76	210617	206738	189174	63846.3	55165.1	44267.9
Q924A5	Slc36a1	Proton-coupled amino acid transporter 1	N	320.011			5528.2	6808.24	5276.2		932.025	1503.06
Q924C3	Enpp1	Ectonucleotide pyrophosphatase/phosphodiesterase family member 1	Y	2214.81	2538.53	2492.25	497132	628427	561483	73024.5	54736	40171.7
Q925B4	Syt8	Synaptotagmin-8	N	26810.7	22115.4	24260	32207.9	33698.1	28735.5	19994.7	32820.9	27349.7
Q99376	Tfrc	Transferrin receptor protein 1	Y	12786.2	15625.3	16841.1	2459920	2994590	2652560	277631	201202	161284
Q99J82	Ilk	Integrin-linked protein kinase	N	2091.9	2600.29	2502.28	50643.4	50028.9	47028.7	11195.7	15936	12194.3
Q99J86	Atrn	Attractin	N	618.039	832.156	1186.51	46146.4	46992	43584.4	9191.09	8022.87	5936.87
Q99JD4	Clasp2	CLIP-associating protein 2	N	1068.49	1333.91	1448.62	8105.13	7058.29	7876.52	2728.83	3563.05	3177.76
Q99M64	Pi4k2a	Phosphatidylinositol 4-kinase type 2-alpha	N	864.158	1151.64	1453.58	44376.7	45123.5	47156.2	8486.88	9508.56	9996.72
Q99M75	Rtn4r	Reticulon-4 receptor	N				121766	138502	123288	14200	13364.3	10196.7
Q99N01	Slco4a1	Solute carrier organic anion transporter family member 4A1	N			754.579	13901.9	14123.7	12026	2547.87	1616.39	2356.51
Q99N02	Slco3a1	Solute carrier organic anion transporter family member 3A1	N	616.867	1197.74	1514.66	41124.8	25892.4	25481.5	8444.17	10311.1	10672.3
Q99P55	Sgpp1	Sphingosine-1-phosphate phosphatase 1	N	3672.38	2336.25	4598.47	8204.97	8769.31	8799.28	3700.38	4148.44
Q99P75	Rab9a	Ras-related protein Rab-9A	N	647.122	592.69	751.947	10440.4	10271.6	10328.4	2514.45	3635.61	3021.65
Q99P84	Plce1	1-phosphatidylinositol 4,5-bisphosphate phosphodiesterase epsilon-1	N				1664.41	1244.02	1355.2	898.359	993.541	888.992
Q99PW3	Neu1	Sialidase-1	N	798.992	773.992	1176.99	5018.96	4318.06	4900.95	1700.99	1697.54	1507.99
Q99PW5	Neu3	Sialidase-3	N				1385.54	1312.6	1570.03	349.695	551.471	779.648
Q99PW6	Mmp24	Matrix metalloproteinase-24	N		258.422		5321.95	4609.88	5182.57	1581.96	1619.27	1258.96
Q9EPH2	Marcksl1	MARCKS-related protein	N	250.922		519.566	7104.31	5480.59	4617.47	2215.19	1996.13	1745.95
Q9EPQ0	Slc24a3	Sodium/potassium/calcium exchanger 3 (Fragment)	N				2757.1	2923.09	2222.07	600.02	546.016	662.02
Q9EPT8	Clic5	Chloride intracellular channel protein 5	N			335.295	4042.69	2597.85	3438.27	892.081	1256.18	903.332
Q9EQ25	Slc38a4	Sodium-coupled neutral amino acid transporter 4	N	1017.13	1860.57	1191.32	284678	380612	324150	48379.7	40671.8	34764.3
Q9EQ60	Cacna1h	Voltage-dependent T-type calcium channel subunit alpha-1H	N	1389.56	2354.62	1556.49	9630.34	8785.6	10107.7	3358.1	3220.43	2817.15
Q9EQH1	Gab2	GRB2-associated-binding protein 2	N		371.649	402.441	4394.51	3962.5	3664.92	941.939	1347.81	1364.9
Q9ERQ6	Cspg5	Chondroitin sulfate proteoglycan 5	N				39634.1	39473.7	37013	7476.38	7083.34	5456.98
Q9ES40	Arl6ip5	PRA1 family protein 3	N	2526.75	4033.59	3095.95	25374.1	26873.9	27281	7242.37	6853.46	7410.01
Q9ES73	Maged1	Melanoma-associated antigen D1	N		595.481	1372.77	18752.9	18965.9	17762.5	4313.22	5811.72	5311.8
Q9ESG3	Cltrn	Collectrin	N				6673.85	6735.83	4443.63
Q9ESQ7	Psd	PH and SEC7 domain-containing protein 1	N			372.483	4697.05	5060.49	4649.48	1968.62	2518.25	2272.42
Q9JHE5	Slc38a2	Sodium-coupled neutral amino acid symporter 2	N	358.528	2408.48	341.869	9473.45	13145.2	13284.4	2579.08	1956.82	2303.24
Q9JHL4	Dbnl	Drebrin-like protein	N	1566.76	2523.73	2364.76	45275.9	46572.7	46350.2	12279.9	19138.3	16723.1
Q9JHW1	Cpd	Carboxypeptidase D	N	5812.13	6149.42	7458.23	178366	191450	182753	34423.1	35331.5	32996.3
Q9JHY1	F11r	Junctional adhesion molecule A	Y	4657.16	4951.56	4205.37	914753	953403	906616	126765	102252	77441.9
Q9JI66	Slc4a4	Electrogenic sodium bicarbonate cotransporter 1	Y	2463.15	2732.66	2184.09	385358	474239	448384	51339.6	45732.6	31629.3
Q9JI92	Sdcbp	Syntenin-1	N		334.75	311.421	3830.11	3441.08	3782.18	1173.22	1191.45	1399.48
Q9JID2	Gna11	Guanine nucleotide-binding protein subunit alpha-11	N	1797.49	2125.72	2292.83	66081.6	71835.7	70610.3	22656.1	31734.4	27487.5
Q9JIR1	Rimbp2	RIMS-binding protein 2	N	415.119	1043.96	1296.37	3200.33	3397.44	3790.79	1416.07	1799.52	1648.48
Q9JIS1	Rims2	Regulating synaptic membrane exocytosis protein 2	N	707.857	923.3	775.868	6465.08	6286.91	5540.19	2336.33	3078.21	2519.47
Q9JJ19	Slc9a3r1	Na(+)/H(+) exchange regulatory cofactor NHE-RF1	N	487.781	926.443	573.949	6103.05	5548.92	5005.83	2233.18	3622.62	2601.8
Q9JJ79	Dync2h1	Cytoplasmic dynein 2 heavy chain 1	N					1688.18	605.553		322.112	605.141
Q9JJK1	Gpm6b	Neuronal membrane glycoprotein M6-b	N				2071.07	2991.11	3108.1	848.028	1096.04	1511.05
Q9JJZ1	Slc2a8	Solute carrier family 2, facilitated glucose transporter member 8	N	476.022	640.033	477.022	1456.75	1551.89	1410.82	527.025	1260.05	780.036
Q9JK11	Rtn4	Reticulon-4	N	3068.99	3373.46	3420.62	92621.8	80924.6	77902.6	16401.6	20863.9	19420.4
Q9JK41	Slc31a1	High affinity copper uptake protein 1	N	439.561	513.763	269.817	5675.3	4415.88	4689.22	1026.21	1737.44	1395.64
Q9JK71	Magi3	Membrane-associated guanylate kinase, WW and PDZ domain-containing protein 3	N	511.507	645.768	869.958	4828.76	4960.11	5073.23	1483.92	2191.39	1473.98
Q9JKA7	Hcn4	Potassium/sodium hyperpolarization-activated cyclic nucleotide-gated channel 4	Y	1349.26	1639.99	1689.59	20626.8	23183.9	21925.4	4570.44	4930.91	4184.11
Q9JKA8	Hcn3	Potassium/sodium hyperpolarization-activated cyclic nucleotide-gated channel 3	N	284.714			739.769	1008.4	856.939
Q9JKA9	Hcn2	Potassium/sodium hyperpolarization-activated cyclic nucleotide-gated channel 2	N	900.23	1279.16	1130.62	4978.05	4343.42	4148.16	1438.55	1735.25	1385.4
Q9JKB0	Hcn1	Potassium/sodium hyperpolarization-activated cyclic nucleotide-gated channel 1	N				1326.4	1766.97	1683.04			427.967
Q9JKE3	Scamp5	Secretory carrier-associated membrane protein 5	N	2283.07	2703.44	3068.21	54984.2	54528.8	51554.6	11674.5	11189.4	12209.6
Q9JKR5	Zdhhc2	Palmitoyltransferase ZDHHC2	N	529.276		519.732	1073.9	1423.54	1264.53	633.243	742.527	640.648
Q9JL55	Gde1	Glycerophosphodiester phosphodiesterase 1	N	967.945	755.078	1271.22	7014.12	6653.49	5568.18	2790.81	2697.02	2960.74
Q9JM15	Slc38a1	Sodium-coupled neutral amino acid symporter 1	N	451.628	437.12	361.691	5309.94	3865.67	4404.65	1224.83	1182.79	1656.76
Q9JM80	Pag1	Phosphoprotein associated with glycosphingolipid-enriched microdomains 1	N				4958.77	3868.89	3668.39	1683.51	2263.28	2359.06
Q9P290	Slc22a17	Solute carrier family 22 member 17	N	649.96			7578.06	7561.39	5740.55	1277.78	1614.66	1688.82
Q9QW30	Notch2	Neurogenic locus notch homolog protein 2	N		15753		45372.4	44083.1	40630.4	8358.96	7323.19	5422.18
Q9QWJ9	Nrp1	Neuropilin-1	Y	491.049	647.536	573.915	109460	127666	113185	18391	15355.5	11636.3
Q9QX69	Lancl1	Glutathione S-transferase LANCL1	N	6036.36	6194.92	8091.55	19844.7	15667.6	17510	7480.61	8124.11	8496.02
Q9QX74	Shank2	SH3 and multiple ankyrin repeat domains protein 2	N	757.343	996.643	687.056	9855.04	9763.06	10142.3	3759.16	5228.58	4665.39
Q9QY17	Pacsin2	Protein kinase C and casein kinase substrate in neurons 2 protein	N	393.466	441.387	928.474	5618.69	4158.96	4576.74	2416.33	3250.35	2799
Q9QYM0	Abcc5	ATP-binding cassette sub-family C member 5	N	1066.94	1457.68	810.793	7347.17	7384.17	7765.61	2231.6	2566	2623.54
Q9QYP2	Celsr2	Cadherin EGF LAG seven-pass G-type receptor 2 (Fragment)	N	627.239	961.68	693.613	132166	147808	131341	26093.6	21057	14469.7
Q9QYV1	Tmeff1	Tomoregulin-1	N				6912.29	7307.79	6227.93	1172.92	1186.47	762.941
Q9QZC5	Grb7	Growth factor receptor-bound protein 7	N	1186.57	1659.24	1803.9	12390.1	13943	15652.4	4005.07	5117.8	4010.69
Q9QZE9	Tmem150a	Transmembrane protein 150A	N				984.035	837.028	477.016
Q9QZK5	Htra1	Serine protease HTRA1	N				987.281	610.119	717.654	237.986	219.135
Q9R066	Cxadr	Coxsackievirus and adenovirus receptor homolog	Y	1555.04	1199.89	1790.21	1190220	1201700	1111740	150256	130713	87903
Q9R080	Gpsm1	G-protein-signaling modulator 1	N	1088.3	1154.06	1504.46	19634.4	17794.3	19227.6	4868.49	6356.21	5076.31
Q9R0C9	Sigmar1	Sigma non-opioid intracellular receptor 1	N	1803.92	1775.29	2160.09	33916.4	33549.9	38206.5	10215.9	14950.9	18015.3
Q9R0I8	Pip4k2a	Phosphatidylinositol 5-phosphate 4-kinase type-2 alpha	N				2242.41	3063.32	2620.77	978.065	1156.29	897.763
Q9R0T4	Cdh1	Cadherin-1	Y	2431.12	5266.75	3419.06	1141250	1321730	1131990	277008	195718	132231
Q9R172	Notch3	Neurogenic locus notch homolog protein 3	N				4226.07	3694.89	4520.64	3258.38	1323.63	1154.85
Q9R175	Ifitm2	Interferon-induced transmembrane protein 2	N		5832.52		47675.6	37293.2	41845.9	15826	16399	12949.3
Q9R1K2	Tenm2	Teneurin-2	N	755.001	532.887	807.703	56267.9	64656.1	59808.7	10127.8	8043.26	6078.12
Q9R1N3	Slc4a7	Sodium bicarbonate cotransporter 3	N	1542.79		1787.06	13042.5	14451.1	13155.2	3292.76	4418.3	4386.85
Q9WTQ1	Prkd1	Serine/threonine-protein kinase D1	N	398.014		749.023	2313.07	2114.06	2225.08	355.011		804.026
Q9WTQ2	Podxl	Podocalyxin	N				205.007	879.035	512.016
Q9WTR8	Phlpp1	PH domain leucine-rich repeat protein phosphatase 1	N	1024.47	1666.06	1906.53	7225.44	6975.94	7173.68	2497.01	3993.64	3501.51
Q9WTW8	Slc23a2	Solute carrier family 23 member 2	N	251.337	440.735	393.684	17666.1	20731.8	19245	5747.54	7241.21	7973.08
Q9WTY2	Rem2	GTP-binding protein REM 2	N	534.979			4787.16	2326.91	3951.82	375.939
Q9WU70	Stxbp5	Syntaxin-binding protein 5	N	3355.94	3489.69	4266.16	23124.9	23637.7	22690.3	6531.37	8521.03	7894.82
Q9WU74	Lsr	Lipolysis-stimulated lipoprotein receptor	Y	1744.17	2456	2308.09	150278	164389	142342	23928.4	21565.6	17427.6
Q9WU82	Ctnnb1	Catenin beta-1	N	1471.92	1682.2	1941.04	56333.8	58060.8	57650.1	24394.3	32820.4	29944.8
Q9WUD2	Trpv2	Transient receptor potential cation channel subfamily V member 2	N	837.307	445.654	527.504	3359.57	3872.3	3595.98	974.638	1618.03	1218.21
Q9WUD9	Src	Proto-oncogene tyrosine-protein kinase Src	N	10054.1	12587.5	14103.4	45054.8	51022.7	47124.3	17339.7	22557.5	22128.7
Q9WUF4	Vamp8	Vesicle-associated membrane protein 8	N		485.011		4127.1	3909.11	2891.07		2207.05	2334.06
Q9WVB9	Dvl1	Segment polarity protein dishevelled homolog DVL-1	N	678.083	293.121	582.021	4331.45	2922.43	3131.26	1020.65	1259.41	1230.06
Q9WVE9	Itsn1	Intersectin-1	N	1165.06	1471.67	1842.71	6198.68	6006.88	6045.59	2031.18	3605.2	2479.96
Q9WVJ6	Tgm2	Protein-glutamine gamma-glutamyltransferase 2	N	1945.37	2046.63	2919.83	11446	11629.1	10919.9	4141.64	4361.21	4708.89
Q9WVR1	Inpp5e	Phosphatidylinositol polyphosphate 5-phosphatase type IV	N	972.399	1672.46	1822.31	7279.04	6454.86	7205.04	2304.75	3091.98	3203.39
Q9WVR3	Inppl1	Phosphatidylinositol 3,4,5-trisphosphate 5-phosphatase 2	N	4814.58	6506.16	6523.34	26052.1	26122.7	25936.4	11121	14259.6	13023.3
Q9WVR6	Slc7a8	Large neutral amino acids transporter small subunit 2	N		345.971		2829.14	2747.91	2533.31	836.93	612.95	606.951
Q9Z0J8	Negr1	Neuronal growth regulator 1	N	186.85			145846	163622	149938	18487.1	14505.4	9876.12
Q9Z0U4	Gabbr1	Gamma-aminobutyric acid type B receptor subunit 1	N				7340.7	7803.33	7520.2	1379.79	1164.22	1047.51
Q9Z0W5	Pacsin1	Protein kinase C and casein kinase substrate in neurons protein 1	N				4507.28	3557.74	3789.97	1907.01	1878.34	1855
Q9Z0W7	Clic4	Chloride intracellular channel protein 4	N	683.582	413.92	771.262	5369.68	4463.45	6055.39	1303.84	1962.94	2139.6
Q9Z143	Sema4f	Semaphorin-4F	N		1315.04	1151.91	18898.4	18396.1	16166.6	3224.78	2636.85	1756.31
Q9Z173	Adgrl3	Adhesion G protein-coupled receptor L3	N	636.259		1635.88	62771.3	70258.5	63914.5	9081.02	7864.36	5116.29
Q9Z1A5	Nae1	NEDD8-activating enzyme E1 regulatory subunit	N	922.46	1460.03	2431.58	4032.91	4089.83	3630.69	2546.02	3050.72	2173.96
Q9Z1E1	Flot1	Flotillin-1	N	1768.59	2340.82	2644.22	27494.2	27797.4	26193.3	8226.64	9113.78	8428.95
Q9Z1P2	Actn1	Alpha-actinin-1	N	2165.24	2284.34	2148.97	23267.7	23438	22727.4	10792.3	13449.6	10773.3
Q9Z1X1	Esyt1	Extended synaptotagmin-1	N	5270.95	5176.9	6501.56	98857.4	103446	103379	16912.5	20914.4	18406.9
Q9Z1Y3	Cdh2	Cadherin-2	N	828.714	733.947	799.213	656083	799881	684576	106646	70895.8	61648.2
Q9Z250	Lin7a	Protein lin-7 homolog A	N				2064.06	1363.04	1055.03	478.014	811.025
Q9Z270	Vapa	Vesicle-associated membrane protein-associated protein A	N	2044.18	2586.6	2435.47	26220.9	25944.1	27161.2	6172.3	7027	5613.43
Q9Z286	Adcy10	Adenylate cyclase type 10	N	6677.85	7947.35	6863.09	13153.9	12199.7	11631.2	8127.54	10668.7	8555.12
Q9Z2H4	Lgr4	Leucine-rich repeat-containing G-protein coupled receptor 4	Y	1923.95	2225.7	1913.83	173657	187869	159891	52204	45836	34242.5
Q9Z2L0	Vdac1	Voltage-dependent anion-selective channel protein 1	Y	33195.4	46605.3	54531	177134	185545	178098	52297.3	54636.6	47147.6
Q9Z2Q3	Hyal2	Hyaluronidase-2	N		121.64		6365.64	7346.1	6654.18	707.4		391.772
Q9Z2S9	Flot2	Flotillin-2	N	2566.52	2861.34	3611.35	31842.8	32557.6	31127.4	9320.79	11360.3	11197.1
Q9Z340	Pard3	Partitioning defective 3 homolog	N	1299.95	1992.92	2209.77	7438.45	7579.4	7686.94	3268.61	3629.88	3340.7

## Sheet: SK-N-SH
Protein.Group	Genes	First.Protein.Description	Biotinylated	PBS-1 intensity	PBS-2 intensity	PBS-3 intensity	GA-1 intensity	GA-2 intensity	GA-3 intensity	(GA+GLP-1)-1 intensity	(GA+GLP-1)-2 intensity	(GA+GLP-1)-3 intensity
A0A2R8Y2R1;A0A2R8Y416;A0A2R8Y448;A0A2R8Y5J3;A0A2R8Y5J6;A0A2R8Y5Q3;A0A2R8Y5X0;A0A2R8Y621;A0A2R8Y628;A0A2R8Y652;A0A2R8Y6D4;A0A2R8Y6S4;A0A2R8Y6U6;A0A2R8Y7J1;A0A2R8Y7Q5;A0A2R8YD68;A0A2R8YE16;A0A2R8YE48;A0A2R8YE99;A0A2R8YEY2;A0A2R8YFA5;A0A2R8YH84;A0A2U3TZN7;C9JR67	SGCE	Epsilon-sarcoglycan (Fragment)	N				809.018	2198.05	1155.03	331.007	215.005	625.016
A0FGR8	ESYT2	Extended synaptotagmin-2	N	1173.39	703.41	897.735	2367.91	3967.43	4990.46	1897.46	3011.62	2563.94
A6NFQ2	TCAF2	TRPM8 channel-associated factor 2	N	3847.79	2719.88	2905.94	6510.9	9066.59	12434.9	5951.61	8689.09	9005.86
A6NGU5;B5MD39;P19440;Q14390	GGT1;GGT3P;GGTLC2;GGTLC3	Putative glutathione hydrolase 3 proenzyme	N					1203.03
A7KAX9	ARHGAP32	Rho GTPase-activating protein 32	N				382.016	412.011	627.021	279.01	526.018	364.014
A8MWY0	ELAPOR2	Endosome/lysosome-associated apoptosis and autophagy regulator family member 2	N				637.851	454.204	1084.91	410.736	424.928
B1AL88	NALF1	NALCN channel auxiliary factor 1	N				1640.78	3484.64	2497.76	1229.36	876.128	1160.53
C9J798;O43374	RASA4;RASA4B	Ras GTPase-activating protein 4B	N	349.902	368.018	278.8	1260.23	1726.41	2311.58	774.655	1574.03	923.253
D6RA20	PCDHA4	Protocadherin alpha-4	N				749.024	1258.04	1275.04		432.014	746.027
O00159	MYO1C	Unconventional myosin-Ic	N	4715.77	3888.7	3281.29	7192.4	12215.5	11916.4	7115.22	10345.5	9265.7
O00161	SNAP23	Synaptosomal-associated protein 23	N	306.618	676.41		1822.6	3132.53	3413.37	1266.06	1909.33	1480.63
O00186	STXBP3	Syntaxin-binding protein 3	N	560.391	393.969	406.523	1349.31	1693.26	2421.51	1058.5	1727.97	1122.29
O00213	APBB1	Amyloid beta precursor protein binding family B member 1	N				221.559	443.021	708.218		826.399	448.299
O00299	CLIC1	Chloride intracellular channel protein 1	N	5897.12	4852.55	6102.17	10932.1	11181.4	11533.5	5652.14	9615.44	9046.86
O00443	PIK3C2A	Phosphatidylinositol 4-phosphate 3-kinase C2 domain-containing subunit alpha	N	1555.47	1089.17	1183.52	2408.45	3401.56	4038.72	2015.51	3390.82	2839.96
O00451	GFRA2	GDNF family receptor alpha-2	N	430.243	250.102	608.907	19386.1	47758.8	47225.8	9501.54	17170.6	22172.8
O00468	AGRN	Agrin	N	970.486	863.872	560.142	1424.09	2373.29	2418.4	1236.91	1994.05	1886.39
O00481	BTN3A1	Butyrophilin subfamily 3 member A1	N				2899.23	8882.13	9004.35	1814.46	2975.21	3826.47
O00522	KRIT1	Krev interaction trapped protein 1	N	376.744	324.003	266.351	374.429	1107.98	671.519	632.762	1006.19	846.218
O00533	CHL1	Neural cell adhesion molecule L1-like protein	N	790.63				1179.03	3053.74	1640.46		2626.3
O00560	SDCBP	Syntenin-1	N				656.02	850.029	813.025		449.014	467.014
O00571	DDX3X	ATP-dependent RNA helicase DDX3X	N	4788.79	3733.31	3996.33	16358.7	27674.3	34025.7	11924.6	19700.5	13448
O00592	PODXL	Podocalyxin	N	1580.86	845.06	1265.8	15981.9	54132.1	35926.9	8973.91	13711.1	13566.7
O00750	PIK3C2B	Phosphatidylinositol 4-phosphate 3-kinase C2 domain-containing subunit beta	N	562.589	713.217	368.298	625.12	1014.73	1003.89	641.335	1079.84	1033.07
O14495	PLPP3	Phospholipid phosphatase 3	N	784.278	639.277	687.282	967.776	1295.37	1443.01	1159.34	1181.56	1815.7
O14641	DVL2	Segment polarity protein dishevelled homolog DVL-2	N	884.668	403.774	1948.19	2190.59	3293.25	3364.1	1299.5	2785.16	1173.31
O14672	ADAM10	Disintegrin and metalloproteinase domain-containing protein 10	N	564.482	410.42	511.274	8690.24	25312	21933.1	5682.31	9923.78	12329.9
O14735	CDIPT	CDP-diacylglycerol--inositol 3-phosphatidyltransferase	N	8483.83	6417.56	4572.96	8026.84	9558.09	6507.04	8206.04	13190.6	14882.6
O14745	SLC9A3R1	Na(+)/H(+) exchange regulatory cofactor NHE-RF1	N	239.934		690.011	863.591	927.659	1786.22	794.273	1245.47
O14786	NRP1	Neuropilin-1	Y	2709.85	1921.37	1093.4	187836	519089	420164	106350	176770	217137
O14795	UNC13B	Protein unc-13 homolog B	N	237.436	223.365	197.08	607.888	558.894	424.733	294.591	561.139	438.168
O14907	TAX1BP3	Tax1-binding protein 3	N	237.011		160.006	815.031	1693.06	1109.05	603.027	579.024	1056.04
O14910;Q9HAP6	LIN7A;LIN7B	Protein lin-7 homolog A	N	508.014			395.01	692.02	1045.03	455.014	430.012	435.013
O14917	PCDH17	Protocadherin-17	N	896.24	557.449	813.613	14867.6	26412.1	23750.8	7402.45	10586.2	17899
O14936	CASK	Peripheral plasma membrane protein CASK	N	1190.29	987.731	1038.71	1624.73	3222.95	3248.09	1303.38	2866.09	1838.41
O14939	PLD2	Phospholipase D2	N	262.112	192.555	161.754	444.264	485.329	542.574	634.025	507.033	508.12
O14965	AURKA	Aurora kinase A	N				295.009	829.026	1099.03	346.01	545.015
O14966	RAB29	Ras-related protein Rab-7L1	N	213.005			919.021	2151.06	1908.05		212.005	983.022
O15031	PLXNB2	Plexin-B2	N	2549.5	2007.03	2254.8	103680	317688	249631	56187.5	101670	126853
O15066	KIF3B	Kinesin-like protein KIF3B	N	1007.02	613.07	578.429	1782.99	2596.83	3552.77	1197.26	2601.19	2259.71
O15294	OGT	UDP-N-acetylglucosamine--peptide N-acetylglucosaminyltransferase 110 kDa subunit	N	853.041	723.243	830.101	1785.34	3244.41	5056.14	1462.8	2577.56	2150.21
O15357	INPPL1	Phosphatidylinositol 3,4,5-trisphosphate 5-phosphatase 2	N	1008.18	961.696	896.197	1550.22	2715.57	3348.65	1524.8	2519.69	2137.59
O15394	NCAM2	Neural cell adhesion molecule 2	Y	2427.53	763.454		24500	63392.4	56065.3	14245.9	22673.3	28624.4
O15427	SLC16A3	Monocarboxylate transporter 4	N	2585.73	2056.43	1725.54	25886.7	43540.3	44197.9	9850.42	26093.5	30440.9
O15431	SLC31A1	High affinity copper uptake protein 1	N	763.687	331.496	238.418	3596.54	11478.2	7387.47	2102.53	2911.98	4660.37
O15439	ABCC4	ATP-binding cassette sub-family C member 4	N	203.984	186.295		685.307	1767.79	1562	543.388	803.109	894.394
O15530;Q6A1A2	PDPK1;PDPK2P	3-phosphoinositide-dependent protein kinase 1	N	141.65	120.468		541.005	831.739	1120.71	379.473	875.764	646.756
O43150	ASAP2	Arf-GAP with SH3 domain, ANK repeat and PH domain-containing protein 2	N	3025.13	1978.64	5585.66	4942.32	9251.57	7221.59	5358.05	8129.62	6174.69
O43155	FLRT2	Leucine-rich repeat transmembrane protein FLRT2	N				634.422	2545.24	1809.46	499.941	894.275	847.58
O43157	PLXNB1	Plexin-B1	N	801.015	334.426	785.902	3349.19	7251.95	9242.04	2392.92	4573.49	6344.26
O43166	SIPA1L1	Signal-induced proliferation-associated 1-like protein 1	N	715.024	683.454	593.468	1119.54	1456.48	1894.35	1430.02	1715.97	1253.42
O43184	ADAM12	Disintegrin and metalloproteinase domain-containing protein 12	N	354.783		261.413	2372.32	7659.46	5393.56	1713.92	2381.97	2585.01
O43300	LRRTM2	Leucine-rich repeat transmembrane neuronal protein 2	N				338.009	1031.03	1337.04	559.016	399.008	889.021
O43306	ADCY6	Adenylate cyclase type 6	N	183.485			775.838	1085.69	1147.25	445.498	812.235	1142.38
O43318	MAP3K7	Mitogen-activated protein kinase kinase kinase 7	N				629.671	756.475	1244.31	174	836.783	357.999
O43493	TGOLN2	Trans-Golgi network integral membrane protein 2	N				256.713	428.85		212.01	235.546	181.65
O43556	SGCE	Epsilon-sarcoglycan	N				4733.29	14830	11637.4	2674.95	4490.31	6287
O43570	CA12	Carbonic anhydrase 12	N	568.97		455.526	17737.2	28865.1	28239.3	9895.51	16266.7	22678.1
O43581	SYT7	Synaptotagmin-7	N	149.682			260.227	707.415	925.586	359.262	553.994	528.179
O43739;Q15438;Q99418	CYTH1;CYTH2;CYTH3	Cytohesin-3	N				498.016	937.029	1373.04	396.012	960.027	751.025
O43813	LANCL1	Glutathione S-transferase LANCL1	N	4823.62	2969.97	2994.91	6604.63	8316.89	10255	5156.62	6636.8	7349.18
O43865	AHCYL1	S-adenosylhomocysteine hydrolase-like protein 1	N	1701.51	1638.88	1538.39	4000.43	5078.79	7002.89	2269.51	3543.2	3760.23
O43895	XPNPEP2	Xaa-Pro aminopeptidase 2	N				973.403	3166.05	3908.49	693.173	1110.02	1589.58
O60241	ADGRB2	Adhesion G protein-coupled receptor B2	N				3403.79	8651.38	6565.89	2647.45	4182.28	4412.92
O60242	ADGRB3	Adhesion G protein-coupled receptor B3	N	702.33			5094.52	12816.2	11418.8	3057.02	5666.26	5482.21
O60245	PCDH7	Protocadherin-7	N	2746.18	1382.11	1941.21	72276.5	105122	101638	46227.3	71027.9	88727.6
O60291	MGRN1	E3 ubiquitin-protein ligase MGRN1	N					903.028			463.016	348.011
O60353	FZD6	Frizzled-6	N		171.761		1434.25	3806.2	2531.58	843.693	1191.84	1981.09
O60437	PPL	Periplakin	N	336.206	422.051	291.973	307.082	421.487	393.302	672.933	578.036	722.028
O60443	GSDME	Gasdermin-E	N	2396.88	2033.25	1394.26	5781.73	8972.75	10961.9	3946.49	6673.61	5321
O60488	ACSL4	Long-chain-fatty-acid--CoA ligase 4	N	1510.81	1112.04	1203.83	2989.55	3978.86	3946.02	1914.95	3019.72	2534.85
O60503	ADCY9	Adenylate cyclase type 9	N				1409.91	1532.99	1740.95	1205.8	1244.95	1651.11
O60609	GFRA3	GDNF family receptor alpha-3	N				3328.59	8155.06	9285.12	2189.77	4297.69	4599.25
O60610	DIAPH1	Protein diaphanous homolog 1	N	780.572	636.154	834.688	1771.86	2840.85	3202	1598.27	2719.49	1491.73
O60641	SNAP91	Clathrin coat assembly protein AP180	N	633.146			497.949	667.386	1209.24	653.43	1474.91	813.593
O60716	CTNND1	Catenin delta-1	N	903.244	952.28	642.262	2949.66	4602.1	5333.84	2118.19	3968.96	2471.22
O60779	SLC19A2	Thiamine transporter 1	N				150.004	1899.06	1131.03	146.005	314.01	1009.03
O60906	SMPD2	Sphingomyelin phosphodiesterase 2	N			116.003	578.019	970.031	575.018	310.009	305.01	167.006
O75044	SRGAP2	SLIT-ROBO Rho GTPase-activating protein 2	N	490.838	516.514	437.259	1482.74	2121.81	3200.86	1018.7	1767.57	1211.03
O75051	PLXNA2	Plexin-A2	N			340.244	6495.67	19295.1	16129.1	3512.22	6071.43	8690.93
O75077	ADAM23	Disintegrin and metalloproteinase domain-containing protein 23	N				420.689	1189.38	668.852	218.877	488.438	491.743
O75084	FZD7	Frizzled-7	N	3316.21	1886.92	1869.35	32787.5	81496.8	72690	17404.8	34169.7	38549.2
O75096	LRP4	Low-density lipoprotein receptor-related protein 4	N	595.62	301.074	217.328	4102.16	9491.05	9264.72	3474.57	5512.33	7457.64
O75110	ATP9A	Probable phospholipid-transporting ATPase IIA	N	1673.18	1366.92	1821.97	3084.94	4829.44	4148.72	2699.83	4271.39	5112.81
O75116	ROCK2	Rho-associated protein kinase 2	N	1287.01	1147.48	983.058	2359.99	3581.38	4228.02	2156.49	2970.1	2331.66
O75122	CLASP2	CLIP-associating protein 2	N	372.305	618.479	469.067	1072.57	1907.63	2354.37	980.96	1625.78	794.38
O75129	ASTN2	Astrotactin-2	N		139.746		635.311	1206.13	906.982	352.275	334.418	493.279
O75131	CPNE3	Copine-3	N	4882.63	3579.66	3738.33	9650.04	13981.1	15925.9	6599.13	9004.08	8881.72
O75144	ICOSLG	ICOS ligand	N				712.791	1730.8	2557.09	364.25	1043.3	1159.38
O75326	SEMA7A	Semaphorin-7A	N				2240.31	5643.51	3472.99	1056.68	965.187	2109.7
O75348	ATP6V1G1	V-type proton ATPase subunit G 1	N	615.436	674.056	784.616	2073.99	2255.08	3150.12	1583.05	2248.87	1655.08
O75473	LGR5	Leucine-rich repeat-containing G-protein coupled receptor 5	N	425.299	153.74	602.147	8865.18	11457.3	17512.6	5354.36	9467.06	12831.7
O75487	GPC4	Glypican-4	N	244.073	360.143		13165.2	36100.2	30408.8	6102.7	11095.1	12453.6
O75581	LRP6	Low-density lipoprotein receptor-related protein 6	N	1527.05			2324.73	5919.41	5017.04	1236.06	2301.98	2844.26
O75608	LYPLA1	Acyl-protein thioesterase 1	N	3159.98	2662.89	2693.37	4402.68	7537.02	8461.89	4633.08	6622.61	4864.06
O75695	RP2	Protein XRP2	N					917.024	373.009	501.015	551.015
O75882	ATRN	Attractin	N	663.82		1126.06	6412.48	14729.1	16055.8	3181.7	5537.68	7005.83
O75915	ARL6IP5	PRA1 family protein 3	N	2888.94	3285.28	2658.29	4772.47	8369.27	6884.9	3574.2	7502.98	8228.77
O75955	FLOT1	Flotillin-1	N	1443.63	1650.84	1446.26	4025.76	5641.08	5530.52	3095.24	5068.41	3113
O75970	MPDZ	Multiple PDZ domain protein	N	3998.29	8217.39	4922.78	13387	17173.7	23228.9	8769.35	14813	12002.1
O75976	CPD	Carboxypeptidase D	N	1550.31	727.147	1022.91	6849.7	14165.3	14158.4	6971.59	9158.45	8862.94
O94804	STK10	Serine/threonine-protein kinase 10	N	185.712	293.285		903.196	1259.33	1856.7	818.265	1074.32	1094.08
O94806	PRKD3	Serine/threonine-protein kinase D3	N			279.659	365.188	497.498	1107.73	384.532	991.508
O94856	NFASC	Neurofascin	N				9469.41	34727.9	25384.4	4524.19	7824.16	10809.1
O94898	LRIG2	Leucine-rich repeats and immunoglobulin-like domains protein 2	N				3038.39	5221.92	5916.74	1699.74	3430.71	4980.54
O94910	ADGRL1	Adhesion G protein-coupled receptor L1	N				8100.88	22895.3	19291.1	4474.07	7913.59	10271.8
O94973	AP2A2	AP-2 complex subunit alpha-2	N	1363.55	924.485	1349.76	2316.87	3327.42	3405.39	1929.64	3894.41	2816.75
O95057	DIRAS1	GTP-binding protein Di-Ras1	N				503.014	1031.03	707.015		701.016	921.02
O95185	UNC5C	Netrin receptor UNC5C	N	1445.38	910.954	1381.33	37982.2	95195.5	81414.6	21907.5	37983.2	49251.9
O95210	STBD1	Starch-binding domain-containing protein 1	N			363.348	1163.92	2704.03	2745.26	914.63	2524.56	2145.9
O95425	SVIL	Supervillin	N	1963.37	1352.87	1640.12	3905.46	5680.25	7165.57	3669.56	4129.53	4314.65
O95477	ABCA1	Phospholipid-transporting ATPase ABCA1	N	84.5647			808.68	2433.48	1819.97	747.367	1245.58	1207.32
O95716	RAB3D	Ras-related protein Rab-3D	N	1191.97	1111.19	674.681	873.438	2364.59	2726.55	1583.72	2209.76	2739.51
O95754	SEMA4F	Semaphorin-4F	N				860.25	2158.33	3046.75	651.513	1755.39	2342.29
O95782	AP2A1	AP-2 complex subunit alpha-1	N	2393.1	2006.66	2068.21	4206.04	5307.43	5676.95	3891.86	5719.12	4045.03
O95980	RECK	Reversion-inducing cysteine-rich protein with Kazal motifs	N	617.726	657.86		29238	53863.1	57256.5	12497.8	29669.4	27373.7
P00505	GOT2	Aspartate aminotransferase, mitochondrial	N	12944.6	8944.32	10893.4	13128.7	14582.4	16475.4	10919.2	14302	13106.6
P00533	EGFR	Epidermal growth factor receptor	N	799.091	815.983	852.51	59279.3	204106	157015	33636.4	58465.7	73787
P01111	NRAS	GTPase NRas	N	2295.52	1735.45	2123.07	4212.25	5583.51	6563.73	3236.77	6365.5	4742.38
P01116	KRAS	GTPase KRas	N			259.141	127.479	369.748	512.745	211.544	486.768
P01130	LDLR	Low-density lipoprotein receptor	N	161.266	2274.07	728.182	5844.02	18135.9	14242.6	2783.71	4833.42	6933.15
P01833	PIGR	Polymeric immunoglobulin receptor	N	594.938	773.204	654.272	378.955	894.245	485.461	678.305	388.569	677.025
P01857	IGHG1	Immunoglobulin heavy constant gamma 1	N	5179.05	7007.77	1154.02	1201.01	2029.14	1773.02	7658.36	1290.01	2781.02
P01859	IGHG2	Immunoglobulin heavy constant gamma 2	N							2209.1
P01876	IGHA1	Immunoglobulin heavy constant alpha 1	N	1018.24	2957.31	1342.08	954.068	1698.17	1192.01	1772.86	1003	1114.3
P01889	HLA-B	HLA class I histocompatibility antigen, B alpha chain	N				712.023	927.033	466.015	357.012	377.013	1197.04
P01909	HLA-DQA1	HLA class II histocompatibility antigen, DQ alpha 1 chain	N		3246.1		3281.09	2036.07	2475.07	3183.09	2857.09	1355.04
P02748	C9	Complement component C9	N				456.018	780.031		394.014	478.017	360.012
P02786	TFRC	Transferrin receptor protein 1	N	4572.73	3312.05	4303.16	113967	347189	266744	76082.6	119978	156956
P04049	RAF1	RAF proto-oncogene serine/threonine-protein kinase	N		531.515	280.737	1361.11	2163.65	3025.58	672.098	1645.19	1173.44
P04083	ANXA1	Annexin A1	N	2994.76	2963.41	2696.3	9054.8	12384.5	11115.6	6114.13	5535.27	7858.09
P04156	PRNP	Major prion protein	N	2361.57	1395	470.97	31971.8	68366.9	48515.1	18358.3	23558.2	29693.7
P04216	THY1	Thy-1 membrane glycoprotein	N	12509.1	9261.45	9856.11	67222	177717	152739	43115.2	84785	93115.5
P04264	KRT1	Keratin, type II cytoskeletal 1	N	1387220	1342920	1235850	1360100	2172110	867567	1981540	832911	1644830
P04439	HLA-A	HLA class I histocompatibility antigen, A alpha chain	N	942.245	1036.86	1178.87	21953.8	38557.5	34117.6	9812.41	17883.1	19476.1
P04632	CAPNS1	Calpain small subunit 1	N	831.158	611.485	884.117	2568.98	2975.88	3685.45	2603.41	2167.55	1978.65
P04899	GNAI2	Guanine nucleotide-binding protein G(i) subunit alpha-2	N	7828.09	7102.58	6929.02	26829.6	39394.9	41681.1	16758.1	24834.4	24057.3
P05023	ATP1A1	Sodium/potassium-transporting ATPase subunit alpha-1	N	5741.62	5893.06	5249.84	19815	34999.7	33041.3	14071	19842.8	17881.9
P05026	ATP1B1	Sodium/potassium-transporting ATPase subunit beta-1	N	5531.73	3531.63	4817.9	69946.7	235500	157688	42146.6	65227.2	77164.7
P05067	APP	Amyloid-beta precursor protein	N	883.409	730.013	386.751	5568.84	15815.9	12777.5	4256.43	6173.79	7777.31
P05106	ITGB3	Integrin beta-3	N	415.821		514.625	9387.8	26651.8	22399.4	4582.25	8168.29	9643.47
P05109	S100A8	Protein S100-A8	N				408.018	1901.06	3203.09	1517.04	3051.09
P05186	ALPL	Alkaline phosphatase, tissue-nonspecific isozyme	N				1527.11	4930.38	3971.9	1111.86	1941.94	2709.48
P05556	ITGB1	Integrin beta-1	N	8115.83	5990.32	6392.03	470973	1392290	1141120	254572	429235	520353
P06213	INSR	Insulin receptor	N				2915.4	7321.74	6397.5	1717.63	3109.4	3812.92
P06702	S100A9	Protein S100-A9	N	1551.75	2065.38	1351.35	1256.06	2188.52	1716.9	4188.62	2263.91	2129.96
P06703	S100A6	Protein S100-A6	N	54844.7	43631.7	53061.9	60016.8	79972.3	75179.4	50471.1	72453.8	65443.4
P06733	ENO1	Alpha-enolase	N	18977.7	17863.3	22851.4	36103.7	28984.3	32047	16924.2	19967.5	25502.4
P06756	ITGAV	Integrin alpha-V	N	1185.23	843.03	790.994	53197.5	155659	127374	27275	50106.7	63582.7
P07237	P4HB	Protein disulfide-isomerase	N	10061.2	8265.7	9948.15	21071.2	29144.8	38969.5	15058.3	19097.9	21306
P07384	CAPN1	Calpain-1 catalytic subunit	N	4017.43	2975.82	2778	5791.11	9589.39	8961.03	5832.57	8493.63	7092.85
P07858	CTSB	Cathepsin B	N	1654.8	1651.71	1877.56	2718.47	3265.62	3171.83	2256.15	2323.07	2476.18
P07900	HSP90AA1	Heat shock protein HSP 90-alpha	N	14919.1	12360.5	13277.4	38850.3	52694	59672.1	28383.9	41215.2	30600.9
P07947	YES1	Tyrosine-protein kinase Yes	N			339.009	1449.04	1828.05	2174.06	644.017	2171.06	1181.03
P07948	LYN	Tyrosine-protein kinase Lyn	N	489.119	916.076	1068.15	2073.7	2188.62	2937.81	1420.02	3241.01	2057.28
P07949	RET	Proto-oncogene tyrosine-protein kinase receptor Ret	N	1233.36	442.42	817.224	10669.2	30349.8	26222.7	6670.93	12911.9	14203.9
P08069	IGF1R	Insulin-like growth factor 1 receptor	N	1127.97		221.277	20480.7	50209.1	40357.1	12771.3	20606.3	26651.9
P08134	RHOC	Rho-related GTP-binding protein RhoC	N	1318.05	1173.04	2220.08	3553.12	4644.15	4378.15	1478.05	3326.1	2709.08
P08138	NGFR	Tumor necrosis factor receptor superfamily member 16	N				797.148	2799.08	2186.06	1035.01	942.734	1459.38
P08183	ABCB1	ATP-dependent translocase ABCB1	N	807.638	383.88	605.345	2314.86	4459.95	5238.57	2213.52	3879.76	2675.78
P08195	SLC3A2	4F2 cell-surface antigen heavy chain	N	557.951	676.92	873.797	10696.4	17499.5	20232.2	4711.17	11060.5	13119.5
P08238	HSP90AB1	Heat shock protein HSP 90-beta	N	59941.6	51496.5	57101.6	172037	219338	254192	110583	175904	125736
P08473	MME	Neprilysin	N	564.055	551.664	637.69	20483.9	60939.1	49425.6	13851.8	25345.4	29588.3
P08582	MELTF	Melanotransferrin	N	708.208		406.863	5029.24	14890.9	12330	3019.85	5688.83	7275.47
P08670	VIM	Vimentin	Y	38636.7	34081.3	50584.3	213213	334176	366272	120411	184661	156176
P08754	GNAI3	Guanine nucleotide-binding protein G(i) subunit alpha-3	N	3833.07	2969.81	3921.1	12860.1	19580.8	19959.4	8755.79	14722.7	10989.9
P08865	RPSA	40S ribosomal protein SA	N	8496.92	7388	8521.56	18029.8	25310.9	27705.4	12563.8	19268.5	18134
P08962	CD63	CD63 antigen	N	1805.18	2773.04	1802.18	4107.88	7404.9	6573.67	3160.25	5760.92	3210.41
P09104	ENO2	Gamma-enolase	N	1390.04	992.028	899.025	2372.07	2472.07	1934.05	1171.03	956.028	1031.03
P09429	HMGB1	High mobility group protein B1	N	5895.58	5278.16	4724.71	15857.1	19610.7	17783.4	6041.53	10162.4	9603.56
P09471	GNAO1	Guanine nucleotide-binding protein G(o) subunit alpha	N	439.354	529.537	450.08	1289.82	1653.34	3614.87	1094.61	2031.73	1250.77
P09603	CSF1	Macrophage colony-stimulating factor 1	N				812.076	2354.39	1783.58	493.086	1303.52	1701.39
P09619	PDGFRB	Platelet-derived growth factor receptor beta	N	1036.37	815.589	443.729	41558.7	121966	93285.3	17337.9	34212.3	43741.9
P0CW19;P0CW20	LIMS3;LIMS4	LIM and senescent cell antigen-like-containing domain protein 3	N			359.667	803.596	828.465	1336.83	504.65	923.223	446.787
P0DOY2;P0DOY3	IGLC2;IGLC3	Immunoglobulin lambda constant 2	N		604.013
P0DP58	LYNX1	Ly-6/neurotoxin-like protein 1	N					458.017	459.016		191.006	160.005
P10301	RRAS	Ras-related protein R-Ras	N	1356.22	2247.61	1593.09	4302.37	6534.28	5058.89	2417.76	4885.75	3708.12
P10321	HLA-C	HLA class I histocompatibility antigen, C alpha chain	N	1624.89	1663.49	925.495	27660.5	61907.6	53741.6	18707.9	29076.2	35995.9
P10398	ARAF	Serine/threonine-protein kinase A-Raf	N	1465.57	1190.12	1624.67	2941.93	5132.08	5780.89	2167.95	4497.98	2617.94
P10644	PRKAR1A	cAMP-dependent protein kinase type I-alpha regulatory subunit	N	661.316		475.547	1303.58	1595.62	2035.94	736.731	1175.32	1396.46
P11142	HSPA8	Heat shock cognate 71 kDa protein	N	34326.4	28592.1	32451.5	78077.9	101931	117383	49529.9	72431.6	59865.6
P11166	SLC2A1	Solute carrier family 2, facilitated glucose transporter member 1	N	3879.72	3801.92	3021.58	7247.41	10129.2	8316.5	5687.02	9552.96	10630.6
P11169;Q8TDB8	SLC2A14;SLC2A3	Solute carrier family 2, facilitated glucose transporter member 3	N	559.017			672.018	1258.04	667.019			1580.04
P11233	RALA	Ras-related protein Ral-A	N	2003.72	2675.91	2533.52	7522.74	11333	13242.2	6597.67	8319.11	7809.15
P11234	RALB	Ras-related protein Ral-B	N				241.006	309.009		317.008	359.008
P11279	LAMP1	Lysosome-associated membrane glycoprotein 1	N	3869.43	3862.24	3692.24	8942.36	14256	10281	5630.76	6772.38	6917.13
P11362	FGFR1	Fibroblast growth factor receptor 1	N			307.813	3102.41	9164.48	7483.88	1577.42	2940.99	3978.61
P11532	DMD	Dystrophin	N			1006.02		7636.2				2859.07
P12814	ACTN1	Alpha-actinin-1	N	4007.58	3438.1	4507.91	12669.3	21212.6	20783	7246	10780.6	12078.2
P12821	ACE	Angiotensin-converting enzyme	N	570.03	314.284		14340.5	29138.4	28120.6	6486.99	13487	17024.5
P12931	SRC	Proto-oncogene tyrosine-protein kinase Src	N	1898.63	1337.14	1451.9	3851.67	5825.9	6228.92	3689.46	6226.88	4451.24
P13164;Q01628;Q01629	IFITM1;IFITM2;IFITM3	Interferon-induced transmembrane protein 1	N	629.023	762.031	573.021	1289.05	1583.07	1405.05	951.034	850.036	858.035
P13473	LAMP2	Lysosome-associated membrane glycoprotein 2	N	407.004	209.003	346.004	584.007	1611.1	719.022	809.01	665.296	504.006
P13591	NCAM1	Neural cell adhesion molecule 1	Y	1333.67	1025.59	889.643	170357	606210	392879	81015	128127	167303
P13637	ATP1A3	Sodium/potassium-transporting ATPase subunit alpha-3	N	1864.63	2197.41	1503.1	4480.35	6372.57	8042.23	3943.83	6086.3	4229.8
P13861	PRKAR2A	cAMP-dependent protein kinase type II-alpha regulatory subunit	N	613.743	513.092	622.335	1689.22	2961.94	3635.18	1163.29	2792.21	1911.55
P13987	CD59	CD59 glycoprotein	N	548.802		663.558	3482.47	9172.4	6920.06	1404.68	2703	3473.23
P14384	CPM	Carboxypeptidase M	N	705.178	732.459		18110.3	49021.3	41555	12884	22176.5	26976.9
P14550	AKR1A1	Aldo-keto reductase family 1 member A1	N	1145.16	704.721	501.813	1409.71	1733.33	2970.3	732.14	1181.81	1325.69
P14735	IDE	Insulin-degrading enzyme	N	2273.78	1935.88	1678.12	2845.72	4612.35	4503.69	3292.75	3437.59	5005.65
P14778	IL1R1	Interleukin-1 receptor type 1	N			581.212	2225.88	5507.71	5092.37	1543.57	2455.18	2640.06
P15104	GLUL	Glutamine synthetase	N				673.017	952.023	1578.04		956.029
P15144	ANPEP	Aminopeptidase N	Y	741.844	1239.38	662.198	49514.7	142291	125184	29016.4	50775.7	61758.5
P15151	PVR	Poliovirus receptor	N	337.14	288.12		47651.7	144032	103790	26443.7	42259.9	48957.4
P15260	IFNGR1	Interferon gamma receptor 1	N				1920.21	7805.71	5676.16	1786.66	2351.58	2332.36
P15291	B4GALT1	Beta-1,4-galactosyltransferase 1	N		233.006	120.003	205.005	644.017	771.018	489.014	849.019	384.008
P15311	EZR	Ezrin	N	1366.52	1500.62	1361.64	3099.73	3894.24	4064.3	2156.85	3360.03	2879.97
P15924	DSP	Desmoplakin	N	41106.5	44633.2	37651.4	40775.9	80610.8	24477.9	87913.5	22542.4	70397.1
P16070	CD44	CD44 antigen	N	5051.28	4736.26	4469.27	669580	1843660	1299660	320230	564464	633372
P16144	ITGB4	Integrin beta-4	N	587.956	198.755		2056.87	5581.69	4935.18	1563.69	2524.33	2898.64
P16234	PDGFRA	Platelet-derived growth factor receptor alpha	N	381.087	1059.39	753.078	16353.2	46379.2	41515.1	9907.92	16643	23427.8
P17181	IFNAR1	Interferon alpha/beta receptor 1	N				2485	7472.16	6179.45	1255.38	2046.8	2743.22
P17252	PRKCA	Protein kinase C alpha type	N	4327.51	3204.5	2672.27	9530.28	14200	16468.6	6513.09	10531.3	9872.89
P17302	GJA1	Gap junction alpha-1 protein	N	366.854	400.967	676.387	829.668	1036.81	860.871	438.807	1008.87	1351.9
P17342	NPR3	Atrial natriuretic peptide receptor 3	N	2084.81	1721.2	1215.01	11959.1	27173	22819.4	7210.3	13562	13829.1
P17612	PRKACA	cAMP-dependent protein kinase catalytic subunit alpha	N	764.03	305.011		156.006	1125.04	965.034	362.012	299.01
P17655	CAPN2	Calpain-2 catalytic subunit	N	3365.13	2649.23	2297.86	5960.68	9067.37	8554.25	4984.61	8477.02	6525.96
P17706	PTPN2	Tyrosine-protein phosphatase non-receptor type 2	N					527.02	703.028			351.014
P17813	ENG	Endoglin	N	222.727	205.741	437.853	6950.61	13933.1	14139.1	3583.32	5668.65	8710.67
P18031	PTPN1	Tyrosine-protein phosphatase non-receptor type 1	N	1664.57	1350.38	1850.84	5517.9	10195.1	13332.5	3870.96	6657.49	5056.74
P18206	VCL	Vinculin	N	3329.21	2756.68	2877.92	8045.42	10635.2	9886.76	5011.6	7742.32	7128.68
P18433	PTPRA	Receptor-type tyrosine-protein phosphatase alpha	N				179.86	652.595	898.584		448.954	663.23
P19022	CDH2	Cadherin-2	N	2266.4	1096.4	746.874	163535	458819	318978	78893.4	135941	169531
P19256	CD58	Lymphocyte function-associated antigen 3	N				9508.39	25788.7	19963.9	4157.39	7135.62	8011.36
P19634	SLC9A1	Sodium/hydrogen exchanger 1	N				486.01	1148.02	1085.02	234.005	403.008	494.013
P20020	ATP2B1	Plasma membrane calcium-transporting ATPase 1	N	1222.39	850.836	878.432	1829.53	3312.87	3482.18	1881.48	2327.7	2433.67
P20309	CHRM3	Muscarinic acetylcholine receptor M3	N	70.5708			2041.61	4313.6	4344.33	1176.68	2300.19	2630.21
P20336	RAB3A	Ras-related protein Rab-3A	N	181.506	155.037	162.598	229.574	355.533	424.387	341.583	192.866	423.626
P20339	RAB5A	Ras-related protein Rab-5A	N	645.685	622.33	790.776	1607.2	2963.3	3249.93	1727.93	2083.95	1545.75
P20594	NPR2	Atrial natriuretic peptide receptor 2	N				3306.76	10811.6	8422.41	2047.85	3708.27	4342.36
P21281	ATP6V1B2	V-type proton ATPase subunit B, brain isoform	N	2309.87	2477.59	2030.27	5489.27	6470.21	7194.32	3486.49	4034.72	4356.27
P21589	NT5E	5'-nucleotidase	Y	4001.68	3389.78	2714.01	131343	364047	320412	74033.8	131726	169743
P21796	VDAC1	Voltage-dependent anion-selective channel protein 1	N	5551.65	4541.92	4626.48	11663.7	13910	14948.3	6627.57	10967.2	7803.56
P21926	CD9	CD9 antigen	N	89.8813			1307.4	2939.73	1072.07	767.128		1117.19
P21964	COMT	Catechol O-methyltransferase	N	880.932	516.886	560.287	1190.16	2783.73	3181.56	1405.47	2644.24	2417.39
P21980	TGM2	Protein-glutamine gamma-glutamyltransferase 2	N	28661.1	22728.6	21675.8	50649.5	65680.3	64628.2	36008	65221.8	61662.9
P22455	FGFR4	Fibroblast growth factor receptor 4	N				417.013	1489.06	660.024		319.011	610.019
P22681	CBL	E3 ubiquitin-protein ligase CBL	N	592.622	564.27	447.688	957.581	1718.52	2774.72	645.954	1270.21	827.581
P22694	PRKACB	cAMP-dependent protein kinase catalytic subunit beta	N		116.832	280.605	649.703	1080.99	1257.67	845.434	1275.82	404.957
P23229	ITGA6	Integrin alpha-6	N	468.003	267.988	735.276	11322.2	32651.8	29610.6	6715.67	12106.1	16500.5
P23469	PTPRE	Receptor-type tyrosine-protein phosphatase epsilon	N	420.138			682.749	1053.93	1399.5	738.585	1300.53	1091.57
P23471	PTPRZ1	Receptor-type tyrosine-protein phosphatase zeta	N				990.031
P23508	MCC	Colorectal mutant cancer protein	N				358.012	1153.04	1346.04		560.015
P23634	ATP2B4	Plasma membrane calcium-transporting ATPase 4	N	3611.06	3061.31	2899.86	6308.13	10707.7	10933.8	6104.76	8870.19	9365.86
P23975	SLC6A2	Sodium-dependent noradrenaline transporter	N	1840.78	1683.52	1801.21	8057.89	20090.3	14007.9	3833.16	6718.42	7860.16
P24394	IL4R	Interleukin-4 receptor subunit alpha	N				1324.6	1955.31	1785	643.46	822.856	1640.09
P25098	GRK2	Beta-adrenergic receptor kinase 1	N	692.617	651.115	644.531	1624.96	2325.67	2831.11	996.577	1793.07	952.308
P25101	EDNRA	Endothelin-1 receptor	N		184.836		5802.81	15836	15352.7	1750.46	6115.28	7498
P25116	F2R	Proteinase-activated receptor 1	N			430.296	3785.64	10740.9	7863.35	1941.04	3055.21	3510.76
P25445	FAS	Tumor necrosis factor receptor superfamily member 6	N	809.907	359.822		1699.64	2231.24	2037.51	1245.82	1620.75	1775.97
P25705	ATP5F1A	ATP synthase subunit alpha, mitochondrial	N	18404.6	15072.3	17528.1	41025.3	55118.4	56525.3	24248.5	37628.7	38122.9
P26006	ITGA3	Integrin alpha-3	N	3818.71	2688.22	1950.51	207736	653777	479762	129246	213453	266696
P26012	ITGB8	Integrin beta-8	N				934.768	1720.09	1754.86	335.852	742.898	742.083
P26038	MSN	Moesin	N	6536.12	5213.84	4658.34	9736.7	10340.3	8578.89	7568.93	12279.9	13609.6
P26232	CTNNA2	Catenin alpha-2	N	319.341			718.332	1837.49	1848.07	1178.08	1337.27	587.98
P26992	CNTFR	Ciliary neurotrophic factor receptor subunit alpha	N	556.243		332.17	22992.7	53529.7	38524.7	10151.4	17098.6	26570.8
P27105	STOM	Stomatin	N	182.009	195.01	411.016	415.018	117.005	284.014		221.009	474.022
P27448	MARK3	MAP/microtubule affinity-regulating kinase 3	N	665.748	598.594	610.29	1664.72	2705.45	4032.24	1446.61	2409.31	1786.67
P27487	DPP4	Dipeptidyl peptidase 4	N		842.819	250.854	9187.82	26275.6	22739.5	6035.16	9850.41	12019.4
P28827	PTPRM	Receptor-type tyrosine-protein phosphatase mu	N				3355.08	5900.42	10527	1564.71	2722.85	5648.59
P29317	EPHA2	Ephrin type-A receptor 2	N	1112.17	605.392	804.518	43621.1	166366	105047	22444.3	36995.7	47485.3
P29323	EPHB2	Ephrin type-B receptor 2	N	800.428	893.245	757.01	37876.3	122973	94384	19238.9	34473.7	44041.7
P29992	GNA11	Guanine nucleotide-binding protein subunit alpha-11	N	1554.76	1554.58	2386	5630.77	9395.22	8786.22	5006.57	6945.93	7598.43
P30153	PPP2R1A	Serine/threonine-protein phosphatase 2A 65 kDa regulatory subunit A alpha isoform	N	3099	2789.64	3238.4	8675.41	13313.7	16318.9	6529.49	10229.3	8104.48
P30530	AXL	Tyrosine-protein kinase receptor UFO	N				2805.91	9639.41	5914.26	1697.39	2862.22	3350.09
P30556	AGTR1	Type-1 angiotensin II receptor	N				1081.81	2223.59	2135.97	1007.46	1291.69	1206.01
P30825	SLC7A1	High affinity cationic amino acid transporter 1	N	1526.18	1120.16	683.202	3608.34	11110.2	10729.9	3212.84	5766.53	5331.58
P30926	CHRNB4	Neuronal acetylcholine receptor subunit beta-4	N				389.011	1037.03	723.021	204.005	562.016	382.009
P30989	NTSR1	Neurotensin receptor type 1	N				765.031	571.025	1230.04		392.013	230.007
P31323	PRKAR2B	cAMP-dependent protein kinase type II-beta regulatory subunit	N	504.292	541.242	519.101	1569.44	2150.98	2221.1	1593.97	2589.7	1517.04
P31749	AKT1	RAC-alpha serine/threonine-protein kinase	N	321.247			496.597	1018.91	919.927	748.912	801.06	598.366
P31751	AKT2	RAC-beta serine/threonine-protein kinase	N				539.32	605.811	747.244	369.938	442.423	421.114
P32004	L1CAM	Neural cell adhesion molecule L1	N	730.073	583.179	542.733	73658.8	286701	194066	32598.9	52052.9	74532.5
P32121	ARRB2	Beta-arrestin-2	N	782.249	345.946	706.406	816.928	1173.47	1723.5	529.924	1553.13	1259.57
P32297	CHRNA3	Neuronal acetylcholine receptor subunit alpha-3	N				1288.37	3736.43	2885.21	739.598	1585.39	1982.81
P32418	SLC8A1	Sodium/calcium exchanger 1	N				1365.77	3846.08	2214.37	803.669	1300.44	1587.94
P32455	GBP1	Guanylate-binding protein 1	N	446.012			244.006	544.014	853.025	512.016	852.021	310.009
P33527	ABCC1	Multidrug resistance-associated protein 1	N	1078.99	1121.1	892.843	13669.3	17991.1	24709	3977.02	12216.2	13742.7
P35052	GPC1	Glypican-1	N	857.12	430.005	469.025	18091.8	50250.6	37196.6	9163.4	18855.6	19997.7
P35221	CTNNA1	Catenin alpha-1	N	1600.76	1390.17	1458.93	3855.67	6277.52	6134.36	3447.93	5269.08	3737.27
P35222	CTNNB1	Catenin beta-1	N	1286.76	846.492	1079.29	3487.23	5759.75	5533.64	3320.27	4688.19	3654.09
P35232	PHB1	Prohibitin 1	N	5256.9	4676.26	7780.01	18573.7	22888.5	25361.8	9004.3	15283.1	12641.8
P35241	RDX	Radixin	N	287.751	388.187	253.334	787.728	1082.79	1070.67	404.377	762.397	400.412
P35372	OPRM1	Mu-type opioid receptor	N				645.816	2679	1968.81	544.761	660.832	1216.97
P35611	ADD1	Alpha-adducin	N	1484.42	1386.47	1483.3	4340	7190.41	7609.38	3195.27	5458.24	3528.82
P35612	ADD2	Beta-adducin	N	2055.23	1299.88	1186.81	1836.2	2583.63	4978.99	1760.29	2151.15	2322.01
P35613	BSG	Basigin	N	5649.77	5600.59	5377.86	31234.7	59014.9	61707.3	16514.8	31001.2	34897.8
P36021	SLC16A2	Monocarboxylate transporter 8	N				519.02	495.017	842.031		620.021	214.005
P36383	GJC1	Gap junction gamma-1 protein	N	768.023	458.015		954.026	751.02	1039.03	221.006	658.016	794.02
P36543	ATP6V1E1	V-type proton ATPase subunit E 1	N	652.615	648.57	663.082	1716.36	2776.18	2687.59	1127.14	1512.07	1334.71
P36894	BMPR1A	Bone morphogenetic protein receptor type-1A	N				2313.14	6482.96	5613.59	1245.48	2009.02	2256.47
P36896	ACVR1B	Activin receptor type-1B	N		634.537		1493.95	4893.09	3638.47	1270.42	1728.82	2134.17
P36897	TGFBR1	TGF-beta receptor type-1	N				1193.9	3095.57	3050.78	771.955	1509.77	1766.95
P37173	TGFBR2	TGF-beta receptor type-2	N					1516.57	1092.4			826.682
P40189	IL6ST	Interleukin-6 receptor subunit beta	N	796.852		559.587	14258.7	29655.6	31836.9	6728.16	11591.2	19114.9
P40818	USP8	Ubiquitin carboxyl-terminal hydrolase 8	N	1454.45	1376.44	996.795	2088.15	3014.17	4229.58	1899.37	3540.71	2767.06
P41240	CSK	Tyrosine-protein kinase CSK	N	2291.06	2338.37	1563.43	4130.55	5945	6715.83	3329.88	5123.13	3932
P41440	SLC19A1	Reduced folate transporter	N	446.623		748.524	3285.77	4151.22	6329.88	1073.28	2732.67	3472.77
P41587	VIPR2	Vasoactive intestinal polypeptide receptor 2	N	232.281		328.224	1854.91	3238.43	4088.33	1127.74	1105.31	1511.07
P42356	PI4KA	Phosphatidylinositol 4-kinase alpha	N	5834.82	4399.45	4135.96	6310.96	9110.42	10038.9	7286.85	10295.7	10255.7
P42566	EPS15	Epidermal growth factor receptor substrate 15	N	435.154	248.616		468.466	1019.23	1379.1	518.542	1141.36	526.976
P42658	DPP6	Dipeptidyl aminopeptidase-like protein 6	N			105.004		711.025	549.022
P42702	LIFR	Leukemia inhibitory factor receptor	N				1378.8	3041.88	2999.75	964.065	1611.16	1624.21
P42892	ECE1	Endothelin-converting enzyme 1	N				6662.69	14178.2	16831.3	3970.38	6963.43	8044.32
P43115	PTGER3	Prostaglandin E2 receptor EP3 subtype	N				1259.89	1847.46	2195.26	792.686	619.649	990.541
P46019	PHKA2	Phosphorylase b kinase regulatory subunit alpha, liver isoform	N	418.789	174.858	154.134	489.572	866.2	710.008	825.806	606.243	557.782
P46020	PHKA1	Phosphorylase b kinase regulatory subunit alpha, skeletal muscle isoform	N	533.955	314.6	379.068	755.733	822.388	967.145	492.904	847.586	697.784
P46108	CRK	Adapter molecule crk	N	211.377			504.42	629.963	723.188	215.549	299.381	606.227
P46531	NOTCH1	Neurogenic locus notch homolog protein 1	N	270.799		252.673	12135.9	24669.1	29687	7233.85	12216	16767.4
P46934	NEDD4	E3 ubiquitin-protein ligase NEDD4	N	834.384		106.878	719.317	1044.65	1268.24	277.569	751.985	411.715
P46940	IQGAP1	Ras GTPase-activating-like protein IQGAP1	N	6889.39	4923.71	4948.46	9416.28	13812.5	13659.8	9863.42	12943.2	13602.9
P48029	SLC6A8	Sodium- and chloride-dependent creatine transporter 1	N		171.722		251.621	193.187	238.95		279.455
P48059	LIMS1	LIM and senescent cell antigen-like-containing domain protein 1	N	575.247		378.178	1042.78	1663.36	2607.27	989.271	872.736	1283.35
P48066	SLC6A11	Sodium- and chloride-dependent GABA transporter 3	N					576.016	463.017		344.01
P48357	LEPR	Leptin receptor	N			692.297	6681.45	9517.59	15844.2	6249.14	9268	13438.6
P48426	PIP4K2A	Phosphatidylinositol 5-phosphate 4-kinase type-2 alpha	N		114.004		165.007	459.02	366.015	220.009	597.025	417.018
P48551	IFNAR2	Interferon alpha/beta receptor 2	N				740.649	2929.13	1581.12	581.188	1039.95	1251.24
P48960	ADGRE5	Adhesion G protein-coupled receptor E5	N				927.566	3051.53	1506.26	612.189	941.223	1097.63
P49006	MARCKSL1	MARCKS-related protein	N	1605.61	588.946	1452.42	5182.24	6566.06	7151.56	2642.34	3226.84	2403.18
P49407	ARRB1	Beta-arrestin-1	N					735.997	709.287	276.989	474.839	721.797
P49674	CSNK1E	Casein kinase I isoform epsilon	N	635.192	220.492		2557.53	5176.89	5308.83	1212.79	3288.34	1732.27
P49755	TMED10	Transmembrane emp24 domain-containing protein 10	N	6759.7	5332.95	5520.22	11097.5	13781.2	14459.3	6919.15	14129	11185.7
P49757	NUMB	Protein numb homolog	N	507.833	331.381	1040.83	1796.88	2591.16	3544.74	1441.6	2789.49	1273.75
P49841	GSK3B	Glycogen synthase kinase-3 beta	N	1576.04	809.019	731.022	2737.08	3526.11	4804.12	1498.04	3804.1	2284.07
P50443	SLC26A2	Sulfate transporter	N			846.22	736.69	1942.18	1541.02	533.325	946.041	1352.47
P50851	LRBA	Lipopolysaccharide-responsive and beige-like anchor protein	N	2186.28	1739.94	1642.19	2875.19	3897.71	4040.84	3321.04	5673.38	5240.85
P51148	RAB5C	Ras-related protein Rab-5C	N	6392.49	6206.89	7678.88	25762	41640.5	43211	19517.3	33675.4	21478.6
P51151	RAB9A	Ras-related protein Rab-9A	N	527.012	313.007	472.012	987.028	2831.08	2258.06	894.023	1148.03	689.017
P51153	RAB13	Ras-related protein Rab-13	N	2187.91	2383.19	1783.03	5186.17	7023.75	7080.56	4157.94	5469.24	5409.2
P51157	RAB28	Ras-related protein Rab-28	N	36239.7	37652.7		64031.5	65787.4	66441.7		67481
P51512	MMP16	Matrix metalloproteinase-16	N				3073.86	9825.67	8055.54	2469.92	2482.87	3867.21
P51636	CAV2	Caveolin-2	N				679.014	1569.03	880.021
P51654	GPC3	Glypican-3	N					3958.09	2614.06		1193.03	1907.04
P51805	PLXNA3	Plexin-A3	N	412.708			1485.34	5318.48	4329.92	1199.87	2082.22	2618.82
P52569	SLC7A2	Cationic amino acid transporter 2	N	748.02			1221.03	2130.06	2477.07	666.021	1154.03	1300.04
P52797	EFNA3	Ephrin-A3	N				789.035	1833.09	1408.07		495.022	782.04
P52799	EFNB2	Ephrin-B2	N		525.045		3467.16	9493.38	6782.91	1968.58	3456	3523.36
P52803	EFNA5	Ephrin-A5	N				952.323	922.01	2140.39	382.372	637.8	1307.82
P52824	DGKQ	Diacylglycerol kinase theta	N				226.004	282.37	513.751		298.698	426.488
P53041	PPP5C	Serine/threonine-protein phosphatase 5	N	776.533	805.968	688.08	1398.09	1877.08	2936.92	707.081	1518.59	1226.65
P53618	COPB1	Coatomer subunit beta	N	4289.53	3267.83	3271.55	11171.4	14635.4	16638.6	7521.35	13635.5	10747.7
P53680	AP2S1	AP-2 complex subunit sigma	N	2028.03	2160.87	2649.91	4784.33	6762.07	6025.14	3448.42	5457.14	6403.69
P53985	SLC16A1	Monocarboxylate transporter 1	N	3014.97	2175.14	2530.1	15813.5	19228.6	16516.2	8030.98	16383.5	16772.5
P54578	USP14	Ubiquitin carboxyl-terminal hydrolase 14	N	2546.49	1588.24	2105.43	4947.93	6524.2	9575.64	3748.07	7659.44	4787.96
P54709	ATP1B3	Sodium/potassium-transporting ATPase subunit beta-3	N	1548.96		396.836	1732.13	5792.2	4225.47	942.697	1940.12	2108.32
P54753	EPHB3	Ephrin type-B receptor 3	N				2790.45	8130.6	6733.26	1427.78	3310.7	3834.45
P54760	EPHB4	Ephrin type-B receptor 4	N	525.707	390.84	340.3	4116.71	12146.4	9355.9	2145.5	3608.64	4834.56
P54762	EPHB1	Ephrin type-B receptor 1	N				462.626	1100.98	732.175			191.511
P54826	GAS1	Growth arrest-specific protein 1	N	618.391			4071.12	11271.4	9325.37	3066.96	6777.55	6396.92
P54920	NAPA	Alpha-soluble NSF attachment protein	N	833.362	471.861	1146.52	3385.14	5787.93	6594.49	3067.9	4868.83	2504.79
P55011	SLC12A2	Solute carrier family 12 member 2	N	339.75			796.377	1259.99	1140.96	554.857	1083.18	882.209
P55040	GEM	GTP-binding protein GEM	N	539.659	618.617	497.72	1367.84	1986.32	2420.05	959.495	1465.28	1408.83
P55042	RRAD	GTP-binding protein RAD	N						470.017		408.014
P55285	CDH6	Cadherin-6	N				1309.36	4166.27	3702.47	1243.2	2037.84	2124.48
P55287	CDH11	Cadherin-11	N	1015.07	880.892	297.863	53218.6	149656	116049	28631	44869.6	57443.9
P55290	CDH13	Cadherin-13	N				9085	30422.1	20686.2	4932.22	10169.1	11585.1
P55899	FCGRT	IgG receptor FcRn large subunit p51	N				315.009	1019.03	1377.47	316.009	503.016	1021.21
P56817	BACE1	Beta-secretase 1	N	827.019	428.011		907.022		789.018	812.019	459.009
P57087	JAM2	Junctional adhesion molecule B	N				6923.42	17940.3	14766.1	3220.72	6130.96	6422.9
P57103	SLC8A3	Sodium/calcium exchanger 3	N				313.009	1219.04	817.026	340.011	495.015	320.011
P58107	EPPK1	Epiplakin	N	556.377	487.03	558.236	418.036	970.743	804.779	1475.44	592.736	1268.49
P58335	ANTXR2	Anthrax toxin receptor 2	N		727.102		9923.68	31193.6	22991.6	5440.54	10309.2	12432.3
P58400	NRXN1	Neurexin-1-beta	N					371.01	902.025	99.0024		152.004
P59190	RAB15	Ras-related protein Rab-15	N	19888.6	21977.7	22788.8	38790.1	58273.9	56432.9			42014.2
P60033	CD81	CD81 antigen	N	313.71	887.454	414.616	3099.39	6068.06	4612.96	1554.75	2733.9	2057.1
P60201	PLP1	Myelin proteolipid protein	N	295.009			360.013	635.02	197.006	231.008		675.026
P60763	RAC3	Ras-related C3 botulinum toxin substrate 3	N	527.023	627.021	686.026		951.034	1415.05	762.031	2062.07	1486.06
P60880	SNAP25	Synaptosomal-associated protein 25	N				363.506	955.972	1042.17	529.723	411.464	365.476
P60953	CDC42	Cell division control protein 42 homolog	N	4865.01	3724.59	4435.34	8158.13	10793.5	10164.7	5692.02	8737.09	5618.13
P61006	RAB8A	Ras-related protein Rab-8A	N	7191.99	4011.21	5597.3	9647.21	14103.9	13572.5	7795.78	11745.5	14660.7
P61019	RAB2A	Ras-related protein Rab-2A	N	3169.33	2626.66	2622.37	5543.33	8155.43	7744.13	4587.65	5829.35	4923.13
P61020	RAB5B	Ras-related protein Rab-5B	N	791.381	625.898	1094.86	2063.83	2828	3180.95	1888.29	2818.79	2025.14
P61073	CXCR4	C-X-C chemokine receptor type 4	N	392.01	99.0034	286.01	2922.09	8964.28	4951.13	786.027	1622.04	1954.06
P61077	UBE2D3	Ubiquitin-conjugating enzyme E2 D3	N	7545.69	5824.23	4993.77	13175.5	14326.5	13708.5	8084.8	13631.2	16088.2
P61224	RAP1B	Ras-related protein Rap-1b	N	10965.1	8161.49	10695.5	21006.9	27033.2	25555.5	14850.8	26861.1	18862.8
P61586	RHOA	Transforming protein RhoA	N	4428.08	3834.27	5136.29	11426.5	13279.4	13707.5	5646.19	10955.7	7279.13
P62070	RRAS2	Ras-related protein R-Ras2	N	194.837	278.049		253.12	360.607	366.516	354.922	372.653	443.453
P62330	ARF6	ADP-ribosylation factor 6	N	1241.82	1045.8	989.603	2729.43	4968.08	5026.6	3354.88	4219.55	3569.94
P62491;Q15907	RAB11A;RAB11B	Ras-related protein Rab-11A	N	4719.63	4534.59	6234.43	13887.4	16784.5	19409	8687.63	13294.2	8851.82
P62834	RAP1A	Ras-related protein Rap-1A	N				475.01	626.015	720.02	324.008	336.007	389.008
P62879	GNB2	Guanine nucleotide-binding protein G(I)/G(S)/G(T) subunit beta-2	N	30355	19958.8	24845.6	52626.6	74515.3	86126.3	38904.6	64420	49864.1
P63000	RAC1	Ras-related C3 botulinum toxin substrate 1	N	8632.25	7229.16	7561.33	13725.7	20196	23901.1	9991.96	20547.5	13691.6
P63010	AP2B1	AP-2 complex subunit beta	N	2559.16	2428.66	1905.81	6143.05	9012.04	8953.87	4426.09	7605	5152.97
P63092;Q5JWF2	GNAS	Guanine nucleotide-binding protein G(s) subunit alpha isoforms short	N	1055.37	899.314	1351	3654.8	5156.07	6994.39	2523.79	4488.5	3750.34
P63096	GNAI1	Guanine nucleotide-binding protein G(i) subunit alpha-1	N	1120.58	1127.26	1686.6	2671.63	5287.23	3762.12	1474.03	2986.42	2646.56
P63165	SUMO1	Small ubiquitin-related modifier 1	N	3731.08	2443.48	2218.44	5955.46	8673.97	7051.57	4422.44	5517.67	4914.96
P63244	RACK1	Receptor of activated protein C kinase 1	N	19207.2	16537.7	21181.6	33639.1	42895	64120.5	20687	31657.3	29122.4
P68104;Q5VTE0	EEF1A1;EEF1A1P5	Elongation factor 1-alpha 1	N	26386.3	22392.4	19058.3	52057.6	80841.6	85410.9	36911.5	64341.6	54673
P78310	CXADR	Coxsackievirus and adenovirus receptor	N	585.115	580.02	335.079	49119	153611	105220	26898.5	43869.2	54491.1
P78348	ASIC1	Acid-sensing ion channel 1	N				680.756	1712.41	2213.45	527.929	1123.56	1149.19
P78356	PIP4K2B	Phosphatidylinositol 5-phosphate 4-kinase type-2 beta	N		401.249	265.38	1380.87	1157.62	1712.34	968.659	1178.57	948.857
P78395	PRAME	Melanoma antigen preferentially expressed in tumors	N		105.138		494.269	669.021	1261.62	172.701	580.044	627.325
P78410	BTN3A2	Butyrophilin subfamily 3 member A2	N				1075.03	2219.07	2230.06		432.012	847.023
P78504	JAG1	Protein jagged-1	N		1259.3		3153.18	8345.28	5841.08	1983.48	2886.64	3418.53
P78524	DENND2B	DENN domain-containing protein 2B	N			195.018	907.868	1778.17	1943.41	532.048	1413.13	930.087
P80723	BASP1	Brain acid soluble protein 1	N	503.909	629.893	528.909	1500.3	2017.47	2502.35	1445.45	1253.17	976.831
P84095	RHOG	Rho-related GTP-binding protein RhoG	N	2157.33	1901.38	2237.59	3604.69	6012.86	5341.86	3557.71	6154.51	4586.96
P98155	VLDLR	Very low-density lipoprotein receptor	N	715.248		284.679	3081.17	8508.7	7845.1	1993.82	4045.69	4360.82
P98161	PKD1	Polycystin-1	N				414.017		781.029		426.015
P98172	EFNB1	Ephrin-B1	N				4260.75	11557.4	8440.36	2120.44	3583.09	4431.51
Q00535	CDK5	Cyclin-dependent kinase 5	N	1866.38	1535.54	1506.27	3819	5017.12	5989.51	2326.48	3935.18	2845.38
Q00765	REEP5	Receptor expression-enhancing protein 5	N	3217.59	2192	2391.3	3915.4	4569.29	3324.59	3244.54	4707.76	4201.23
Q01082	SPTBN1	Spectrin beta chain, non-erythrocytic 1	N	4269.03	3759.73	3699.14	11609.1	19273.4	17733.2	9185.85	13211.3	11019.6
Q01484	ANK2	Ankyrin-2	N	1552.75	1109.21	1072.12	1724.33	2669.28	3360.02	2077.59	2954.82	2698.01
Q01518	CAP1	Adenylyl cyclase-associated protein 1	N	4795.31	3930.36	4702.44	9423.55	10514.6	12464.5	5341.86	7806.02	6775.3
Q01650	SLC7A5	Large neutral amino acids transporter small subunit 1	N	603.686	286.889	253.9	1570.25	5700.9	4555.96	1193.53	1319.68	2513.4
Q01844	EWSR1	RNA-binding protein EWS	N	3169.91	1771.2	1906.59	13102.1	21180.5	32552.5	8469.34	17483.6	15502
Q01974	ROR2	Tyrosine-protein kinase transmembrane receptor ROR2	N	560.826	354.149	424.532	13054.1	42621.1	31501.1	6840.4	11858.2	15007.3
Q02246	CNTN2	Contactin-2	N				346.89	1746.56	1164.15	224.43	239.437	623.639
Q02297	NRG1	Pro-neuregulin-1, membrane-bound isoform	N				1110.53	2860.4	2254.86	816.275	986.712	917.107
Q02413	DSG1	Desmoglein-1	N	10760	10352.1	9798.39	9723.66	18790	6591.43	26323.8	6911.22	14278.1
Q03001	DST	Dystonin	N	824.387	636.079	998.551	1661.47	2323.32	2993.42	1074.17	1696.28	1999.98
Q03135	CAV1	Caveolin-1	N	15859.1	17590.1	17051.8	20915.3	41561.4	21199.6	23018.3	23706.9	25679.8
Q03405	PLAUR	Urokinase plasminogen activator surface receptor	N	375.55			434.138	1161.71	1068.03	413.735	366.511	582.078
Q04656	ATP7A	Copper-transporting ATPase 1	N	1327.87	961.519	960.154	2700.46	4649.48	5733.44	2275.83	4001.66	3461.31
Q04721	NOTCH2	Neurogenic locus notch homolog protein 2	N	1418.34	1288.04	1618.26	41462.4	116325	99919.4	24046.2	42857.5	51915
Q05397	PTK2	Focal adhesion kinase 1	N	1240.04	997.196	773.314	2141.11	3191.86	3046.13	1839.04	3138.4	2452.26
Q05655	PRKCD	Protein kinase C delta type	N				580.743	555.955	550.807	624.367	591.648	359.433
Q06418	TYRO3	Tyrosine-protein kinase receptor TYRO3	N						271.007
Q06481	APLP2	Amyloid beta precursor like protein 2	N	723.497	567.873	624.597	2368.78	6008.67	5619.56	1816.07	2374.73	2569.7
Q06787	FMR1	Synaptic functional regulator FMR1	N	364.979		284.984	1247.96	1992.7	2277.69	620.964	1440.16	1254.93
Q07021	C1QBP	Complement component 1 Q subcomponent-binding protein, mitochondrial	N	802.53	974.04	559.313	1043.64	1985.6	2050.4	975.157	984.572	1291.59
Q07065	CKAP4	Cytoskeleton-associated protein 4	N	2765.5	2789.52	3624.9	14767.3	20984.8	20408.2	10138.1	12036.1	14578.8
Q07157	TJP1	Tight junction protein ZO-1	N	1293.56	887.565	1009.38	2142.6	3134.33	3022.71	1945.07	2624.69	1961.55
Q07912	TNK2	Activated CDC42 kinase 1	N				303.011			187.009		440.017
Q07954	LRP1	Prolow-density lipoprotein receptor-related protein 1	N	1204.16	1012.24	1140.16	6419.21	15094.2	14381	4519.45	8146.07	8239.86
Q08174	PCDH1	Protocadherin-1	N	1545.71	961.373	1234.02	38107.7	56941.2	50485.2	31436.6	44770.7	64281.4
Q08209	PPP3CA	Protein phosphatase 3 catalytic subunit alpha	N	2948.57	2245.94	1852.77	5590.43	8209.51	9868.44	3703.93	6102.75	4801.52
Q08345	DDR1	Epithelial discoidin domain-containing receptor 1	N	44188.2	38704.7	44098.2	29867.6	82907.6	68425.9	16130.8	28412.8	33411.8
Q08499	PDE4D	cAMP-specific 3',5'-cyclic phosphodiesterase 4D	N					556.601	990.365		379.306
Q08554	DSC1	Desmocollin-1	N	7504.38	7800.67	6855.28	5408.51	11261.8	4481.06	16380.1	5172.94	8492.69
Q08722	CD47	Leukocyte surface antigen CD47	N	2028.27	1966.04	2204.19	19758.6	49532.9	35715	9556.56	14776.1	20981.2
Q10588	BST1	ADP-ribosyl cyclase/cyclic ADP-ribose hydrolase 2	N				10547.5	33464.7	23847.7	6460.06	11371.2	14099.7
Q10589	BST2	Bone marrow stromal antigen 2	N				2512.25	5870.21	4966.25	1297.52	1600.01	1762.28
Q12791	KCNMA1	Calcium-activated potassium channel subunit alpha-1	N	1405	1386.51	1057.76	2519.32	3276.35	4143.16	2277.34	4085.7	4039.28
Q12809	KCNH2	Potassium voltage-gated channel subfamily H member 2	N				164.848	635.875	184.335	247.639	590.005	324.93
Q12846	STX4	Syntaxin-4	N				544.018	946.028	690.017	284.009	130.004
Q12860	CNTN1	Contactin-1	Y	2289.24	1853.3	1457.9	469021	1359450	1041680	243349	405133	566450
Q12864	CDH17	Cadherin-17	N				1934.89	4639.98	5857.48	1572.06	2207.93	2855.25
Q12866	MERTK	Tyrosine-protein kinase Mer	N				1395.57	5206.98	3443.24	739.618	1497.82	1529.83
Q12884	FAP	Prolyl endopeptidase FAP	N	2552.44	1269.41	1247.11	195415	499761	436192	101044	208223	243345
Q12891	HYAL2	Hyaluronidase-2	N				2480.02	8083	5944.43	1265.02	1929.19	2704.94
Q12913	PTPRJ	Receptor-type tyrosine-protein phosphatase eta	N	117.272		25152.4	6171.92	14633.7	12268.6	3196.25	5354.47	7835.74
Q12955	ANK3	Ankyrin-3	N	621.287	480.222	488.756	630.854	1094.88	1156.24	913.821	1209.72	954.825
Q12959	DLG1	Disks large homolog 1	N	605.5	1262.54	885.654	2185.66	3117.6	2761.93	1729.36	2191.41	1421.07
Q13002	GRIK2	Glutamate receptor ionotropic, kainate 2	N				444.334	1395.16	1035.24	330.34	796.249	632.436
Q13017	ARHGAP5	Rho GTPase-activating protein 5	N	1660.74	1358.25	1023.23	1957.22	2768.77	3050.58	2242.22	3161.7	2555.68
Q13153	PAK1	Serine/threonine-protein kinase PAK 1	N					977.18	893.564	599.839	845.611	548.722
Q13177	PAK2	Serine/threonine-protein kinase PAK 2	N	1548.82	1592.94	1661.41	4678.28	7103.21	8472.47	3557.22	6451.91	4314.37
Q13332	PTPRS	Receptor-type tyrosine-protein phosphatase S	N	4228.26	2231.61	382.164	23945.2	72190.2	61015	17060.5	31185	37227.8
Q13418	ILK	Integrin-linked protein kinase	N	350.697	561.581	642.698	1871.26	3120.01	3874.27	1854.48	2606.27	1728.46
Q13421	MSLN	Mesothelin	N				449.001	1820.34	785.999	426.461	452.396	715.712
Q13433	SLC39A6	Zinc transporter ZIP6	N	1717.33	1217.89	883.065	19215.9	50161.9	38277.8	14205.3	18102.3	27080.6
Q13443	ADAM9	Disintegrin and metalloproteinase domain-containing protein 9	N	856.192	652.396	654.434	5154.03	13611.6	11167.7	3167.93	5437.74	5907.62
Q13445	TMED1	Transmembrane emp24 domain-containing protein 1	N	318.008		252.007	526.013	410.012	598.017	499.012	343.011	211.007
Q13449	LSAMP	Limbic system-associated membrane protein	Y	587.72	271.577	424.691	34467.3	90611.2	78622.1	15003.7	29879.2	37177.7
Q13464	ROCK1	Rho-associated protein kinase 1	N	936.95	487.816	556.742	1435.79	2281	2375.85	1253.48	1871.03	1804.97
Q13492	PICALM	Phosphatidylinositol-binding clathrin assembly protein	N	548.966	547.786	849.264	1389.27	2789.61	2669.68	1201.16	2260.72	1367.74
Q13546	RIPK1	Receptor-interacting serine/threonine-protein kinase 1	N	1680.49	1293.69	1494.84	3260.37	6305.5	8221.95	3461.99	5871.09	4513.46
Q13557	CAMK2D	Calcium/calmodulin-dependent protein kinase type II subunit delta	N	2038	1537.27	1691.81	4772.8	7143.04	7967.99	3327.2	5837.57	4128.35
Q13563	PKD2	Polycystin-2	N	1493.73	2518.32	1250.02	1988.85	3301.76	3136.98	1690.36	2969.9	2914.96
Q13564	NAE1	NEDD8-activating enzyme E1 regulatory subunit	N	1010.63	603.745	975.753	1751.59	2008.97	2548	1203.43	2011.38	1342.64
Q13586	STIM1	Stromal interaction molecule 1	N	215.831	248.875	408.46	401.376	1116.63	1148.56	405.912	487.771	971.752
Q13613	MTMR1	Myotubularin-related protein 1	N					609.028	239.01	311.012	554.025
Q13634	CDH18	Cadherin-18	N				568.21	2874.02	1829.41	503.883	805.463	840.043
Q13641	TPBG	Trophoblast glycoprotein	N		286.276	518.089	46294.5	126483	112344	24051.2	53425.8	61797.4
Q13685	AAMP	Angio-associated migratory cell protein	N	1158.83	698.124	667.436	2474.27	3033.87	3798.23	1607.92	1909.27	1598.1
Q13740	ALCAM	CD166 antigen	Y	2597.32	1438.03	1195.96	227562	755575	537208	88372	163968	195523
Q13873	BMPR2	Bone morphogenetic protein receptor type-2	N				4031.15	11679.4	8549.39	2162.09	3550.69	3795.54
Q14088	RAB33A	Ras-related protein Rab-33A	N	322.098		406.088	855.853	729.893	480.702	591.611	950.433	822.926
Q14114	LRP8	Low-density lipoprotein receptor-related protein 8	N				3034.77	11260.2	7513.36	1960.84	2669.22	3095.26
Q14118	DAG1	Dystroglycan 1	N				6979.95	18512.9	17110.6	3813.21	6812.34	7810.29
Q14160	SCRIB	Protein scribble homolog	N	1473.67	1102.99	985.876	3235.52	5557.63	7276.58	2910.63	4353.05	3614.86
Q14247	CTTN	Src substrate cortactin	N	7138.79	5502.95	4965.04	17309.6	25834.5	32222.5	11162.1	14630.7	14353.2
Q14254	FLOT2	Flotillin-2	N	1520.99	1198.91	1400.99	3672.08	5374.21	4630.28	3025.57	4248.51	3287.94
Q14289	PTK2B	Protein-tyrosine kinase 2-beta	N			661.016		2465.07		1255.03
Q14332	FZD2	Frizzled-2	N	529.464		540.456	1776.87	5807.92	4588.41	923.829	2297.47	2116.76
Q14344	GNA13	Guanine nucleotide-binding protein subunit alpha-13	N	25165.9	17859.3	19020.7	57092.7	102646	108047	41853.6	70488.5	57177.1
Q14439	GPR176	G-protein coupled receptor 176	N				522.773	755.356	936.435		787.245	344.225
Q14517	FAT1	Protocadherin Fat 1	N	558.863	3060.33	2207.97	8102.14	17687	18619.6	4992.72	8693.84	11982.4
Q14574	DSC3	Desmocollin-3	N	2575.45	2564.73	1543.56	1358.01	2952.35	1225.21	3175.93	1606.01	1872.76
Q14644	RASA3	Ras GTPase-activating protein 3	N	664.172	457.96	346.231	592.43	721.203	936.241	451.706	730.544	663.143
Q14680	MELK	Maternal embryonic leucine zipper kinase	N	335.936		401.854	554.222	1214.05	1464.26	338.673	848.364	617.386
Q14689	DIP2A	Disco-interacting protein 2 homolog A	N	91.003		454.016	360.012	956.033	709.023	417.013	299.012	589.022
Q14699	RFTN1	Raftlin	N	1237.74	1435.39	281.645	1731.01	3308.36	3973.87	1950.99	3386.74	2593.37
Q14831	GRM7	Metabotropic glutamate receptor 7	N				977.756	2567.28	1927.58	708.776	803.417	1009.53
Q14956	GPNMB	Transmembrane glycoprotein NMB	N	1899.05	1323.03	1812.05	5014.15	7054.18	8609.24	2119.05	6962.2	6850.15
Q14964	RAB39A	Ras-related protein Rab-39A	N	401.61	548.391	790.996	2007.26	2573.18	2285.88	1349.84	1948.21	2036.47
Q14980	NUMA1	Nuclear mitotic apparatus protein 1	N	83421.5	65466.6	66167.8	199707	345614	430388	146861	230439	153528
Q14BN4	SLMAP	Sarcolemmal membrane-associated protein	N				262.01	932.03	904.028	311.01	460.016	218.008
Q15043	SLC39A14	Metal cation symporter ZIP14	N				357.012	817.025	443.018		136.005	313.011
Q15046	KARS1	Lysine--tRNA ligase	N	3674.42	2913.53	4085.64	6748.61	10756.7	14627.8	5236.48	9278.92	5850.35
Q15084	PDIA6	Protein disulfide-isomerase A6	N	9148.51	7217.39	9045.51	19829.1	25007.1	35840.1	15570.9	21527.9	18078.8
Q15223	NECTIN1	Nectin-1	N				19658.3	68807.5	45158.8	9362.07	15680.8	19961.7
Q15256	PTPRR	Receptor-type tyrosine-protein phosphatase R	N				1098.76	2240.78	1842.15	330.502	870.021	1083.64
Q15262	PTPRK	Receptor-type tyrosine-protein phosphatase kappa	N	308.345	3960.17	5446.94	15510.5	46798.7	35640.9	8738.7	15617.7	18998.5
Q15286	RAB35	Ras-related protein Rab-35	N	10111.7	8530.07	5667.8	15141.6	20466.2	19206.3	9268.02	16864	21113
Q15303	ERBB4	Receptor tyrosine-protein kinase erbB-4	N				370.013	1050.04	785.026		470.016	653.023
Q15599	SLC9A3R2	Na(+)/H(+) exchange regulatory cofactor NHE-RF2	N			527.538	634.468	1060.96	1291.08	456.97	714.675	311.129
Q15758	SLC1A5	Neutral amino acid transporter B(0)	N	1862.75	1257.19	1346.06	3459.14	4460.15	4785.67	2448.55	4155.8	4373.22
Q15760	GPR19	Probable G-protein coupled receptor 19	N				821.03	1741.05	1164.03	367.013	575.016	561.018
Q15811	ITSN1	Intersectin-1	N	1024.55	1015.31	2176.28	976.886	1557.17	2277.83		1298.96	1270.91
Q15836	VAMP3	Vesicle-associated membrane protein 3	N	273.352		336.276	507.177	719.051	435.553		550.598	348.381
Q15858	SCN9A	Sodium channel protein type 9 subunit alpha	N	611.031	389.236	529.53	1299.26	1991.04	2979.4	1165.13	1907.41	2253.51
Q16512	PKN1	Serine/threonine-protein kinase N1	N	1035.34	688.024	934.018	1662.23	3068.29	3643.11	1548.35	2928.19	2174.84
Q16515	ASIC2	Acid-sensing ion channel 2	N									511.013
Q16602	CALCRL	Calcitonin gene-related peptide type 1 receptor	N				541.443	785.664	1232.35		421.131	761.618
Q16625	OCLN	Occludin	N				7070.63	23809.8	15031.9	3390.74	5916.4	7483.54
Q16832	DDR2	Discoidin domain-containing receptor 2	N	589.597	724.705	238.033	25161.8	81856.4	60355.8	12678	24949.5	27163.2
Q29983	MICA	MHC class I polypeptide-related sequence A	N				16362.7	26291.5	42793.1	6193.32	11709.2	16971.4
Q2M2I8	AAK1	AP2-associated protein kinase 1	N	947.535	941.767	762.444	2275.65	3752.28	3704.53	1622.51	2777.9	1993
Q2TAL8	QRICH1	Transcriptional regulator QRICH1	N	858.418	620.575	873.274	2742.1	4538.67	5360.32	2396.61	3452.4	2076.15
Q32ZL2	PLPPR5	Phospholipid phosphatase-related protein type 5	N				663.646	1162.46	855.056	445.919	543.641	1228.22
Q3V6T2	CCDC88A	Girdin	N		237.22		961.963	2008.41	1514.98	722.283	1206.7	844.115
Q4KMG0	CDON	Cell adhesion molecule-related/down-regulated by oncogenes	N				4572.03	14643.5	13324.4	3374.18	6258.99	7781.62
Q4KMQ2	ANO6	Anoctamin-6	N	515.921	441.115	491.092	3487.46	9457.93	6922.54	2297.69	3460.5	3564.41
Q4V9L6	TMEM119	Transmembrane protein 119	N	181.805	472.999		2303.23	2777.59	3203.71	1049.77	1851.97	2141.33
Q53EL9	SEZ6	Seizure protein 6 homolog	N				1441.04	5921.27	5006.47	2096.46	2632.86	3210.84
Q53TN4	CYBRD1	Plasma membrane ascorbate-dependent reductase CYBRD1	N	601.975	488.98	952.961	1763.06	3670.21	2164.71	803.966	1852.21	2362.12
Q5BJF2	TMEM97	Sigma intracellular receptor 2	N	1165.71	980.678	1071.02	3254.6	2182.04	2111.92	1269.79	2382.95	1999
Q5HYA8	TMEM67	Meckelin	N				1110.74	2882.09	2535.34	574.692	1130.94	1543.46
Q5JTD0	TJAP1	Tight junction-associated protein 1	N				575.546	608.543	1104.74	191.76	253.514
Q5T0N5	FNBP1L	Formin-binding protein 1-like	N	244.518		309.18	1278.23	2055.24	2000.8	622.638	1771.57	474.475
Q5T3F8	TMEM63B	CSC1-like protein 2	N	330.833		203.219	762.305	1629.55	1603.88	560.776	888.028	816.087
Q5T5C0	STXBP5	Syntaxin-binding protein 5	N	689.26	501.708	238.916	699.36	1052.94	1766.72	805.034	1056.71	1039.77
Q5T9L3	WLS	Protein wntless homolog	N				395.713	1146.08	576.21	303.283	694.184	442.562
Q5TCQ9	MAGI3	Membrane-associated guanylate kinase, WW and PDZ domain-containing protein 3	N				341.068	347.803	610.043	230.047	441.088	651.13
Q5VUB5	FAM171A1	Protein FAM171A1	N		1149.42		2957.66	9811.61	7519.6	1531.28	2588.11	3459.73
Q5VWQ8	DAB2IP	Disabled homolog 2-interacting protein	N				629.289	201.193	670.386		459.627	287.208
Q5VZ89	DENND4C	DENN domain-containing protein 4C	N	1559.76	1334.17	1122.82	2104.19	2870.59	3817.66	1969.58	3207.85	3000.22
Q5VZK9	CARMIL1	F-actin-uncapping protein LRRC16A	N	520.997	270.542	378.565	678.965	815.412	1129.79	956.353	1294.4	1133.31
Q63HR2	TNS2	Tensin-2	N	975.361	703.409	508.607	801.769	1584.23	2738.15	991.088	1790.67	1456.18
Q641Q2	WASHC2A	WASH complex subunit 2A	N		138.003		286.007	993.023	748.019	208.004	478.012	437.011
Q68CZ2	TNS3	Tensin-3	N	18096.9	17132.8	14080.4	38375.2	50806.1	75125.4	29556.2	41097.6	38283.3
Q68D85	NCR3LG1	Natural cytotoxicity triggering receptor 3 ligand 1	N				1351.39	2252.45	2588.94	1103.95	1518.74	2373.28
Q68D91	MBLAC2	Acyl-coenzyme A thioesterase MBLAC2	N	471.242	493.895	617.038	710.281	1216.37	1056.17	934.241	829.827	450.083
Q68DA7	FMN1	Formin-1	N	289.002	224.769	286.446	816.746	1027.98	1630.63	599.817	746.278	625.404
Q68DH5	LMBRD2	G-protein coupled receptor-associated protein LMBRD2	N		430.014		316.01	904.032	884.026	255.007	1097.03	894.025
Q6IAA8	LAMTOR1	Ragulator complex protein LAMTOR1	N	2441.4	1787.5	2024.42	3949.97	5635.74	8381.9	3208.55	4464.01	4297.24
Q6N022	TENM4	Teneurin-4	N	1993.53	1666.93	1588.8	44100.6	131488	107166	21583.6	40581.1	52097.5
Q6N075	MFSD5	Molybdate-anion transporter	N	163.007				93.0037		106.003	134.006	291.01
Q6NW40	RGMB	Repulsive guidance molecule B	N				297.75	1296.42	742.817	365.054	552.573	859.632
Q6NZI2	CAVIN1	Caveolae-associated protein 1	N		277.836	151.041	1163.05	2397.38	1549.62	979.903	775.647	1333.65
Q6P0Q8	MAST2	Microtubule-associated serine/threonine-protein kinase 2	N	321.106			458.36	900.089	877.489	912.222	1074.79	1081.7
Q6P4Q7	CNNM4	Metal transporter CNNM4	N	691.595		133.055	2625.67	7887.44	6201.27	1623.66	2998.6	3471.36
Q6P9F7	LRRC8B	Volume-regulated anion channel subunit LRRC8B	N				592.809	920.231	1589.69	664.109	557.001	1579.28
Q6PCB7	SLC27A1	Long-chain fatty acid transport protein 1	N	585.233			939.662	882.505	1550.48	688.475	905.044	1059.83
Q6PCB8	EMB	Embigin	N				1933.38	4255.81	3589.16		1438.76	2143.06
Q6PIU2	NCEH1	Neutral cholesterol ester hydrolase 1	N	588.921	574.435	777.82	805.952	1368.49	972.743		1036.42	885.435
Q6PJF5	RHBDF2	Inactive rhomboid protein 2	N	652.133	731.064	525.051	1305.45	2948.59	2980.03	1711.79	1437.22	1847.22
Q6PJW8	CNST	Consortin	N				724.494	726.01	1545.94	491.322	1099.07	424.143
Q6UXD5	SEZ6L2	Seizure 6-like protein 2	N	1252.83	896.216	682.508	14182.5	37383.7	31572.2	10285.3	16829.7	18883
Q6UXK2	ISLR2	Immunoglobulin superfamily containing leucine-rich repeat protein 2	N		156.503		11009.3	39931.6	28375.4	5252.04	8590.67	12122.4
Q6XUX3	DSTYK	Dual serine/threonine and tyrosine protein kinase	N	154.558			538.554	1248.12	906.85	734.298	300.471	636.377
Q6YHK3	CD109	CD109 antigen	N	3527.98	2093.83	1659.85	294157	749134	686067	154404	297232	372360
Q6ZN44	UNC5A	Netrin receptor UNC5A	N				1228.33	3295.56	2974.61	932.175	967.754	1384.43
Q6ZRP7	QSOX2	Sulfhydryl oxidase 2	N			238.008	662.026	701.025	1078.04	343.014	675.028	339.013
Q6ZSZ5	ARHGEF18	Rho guanine nucleotide exchange factor 18	N					708.581	503.957	331.141	309.027
Q70E73	RAPH1	Ras-associated and pleckstrin homology domains-containing protein 1	N	573.404	430.575	377.407	923.57	1698.76	1962.94	957.837	1505.74	1062.43
Q7KZI7	MARK2	Serine/threonine-protein kinase MARK2	N				296.59	1096.04	715.062	513.444	719.698	488.663
Q7L1W4	LRRC8D	Volume-regulated anion channel subunit LRRC8D	N				3674.14	11761.4	8665.87	2314	3839.15	4194.6
Q7L5N7	LPCAT2	Lysophosphatidylcholine acyltransferase 2	N	1013.31	676.955	983.095	2544.41	5471.59	5554.53	1971.69	3405.51	2238.25
Q7L5Y9	MAEA	E3 ubiquitin-protein transferase MAEA	N			656.967	583.639	1313.42	1050.97	401.382	568.208	486.281
Q7Z2K8	GPRIN1	G protein-regulated inducer of neurite outgrowth 1	N	763.512		496.336	2219.21	4023.92	5117.69	2152.5	2879.22	1775.76
Q7Z3B1	NEGR1	Neuronal growth regulator 1	N	349.742			11898.1	37523	28279.7	6269.64	11029.7	12256.2
Q7Z5N4	SDK1	Protein sidekick-1	N	1131.66	333.006		9687.34	28297.5	24937.7	6667.9	11673.2	14923.9
Q7Z6M3	MILR1	Allergin-1	N				906.151	1376.02	1382.49	546.008	644.441	1410.79
Q86SQ4	ADGRG6	Adhesion G-protein coupled receptor G6	N	973.772	704.425	866.53	1806.01	4268.77	2769.19	1240.23	1547.91	2312.07
Q86U90	YRDC	Threonylcarbamoyl-AMP synthase	N					246.739	552.928	295.318	497.572	201.282
Q86UD5	SLC9B2	Sodium/hydrogen exchanger 9B2	N					249.006
Q86UE6	LRRTM1	Leucine-rich repeat transmembrane neuronal protein 1	N				1817.1	3771.76	5319.12	1674.26	2787.78	4426.42
Q86UN3	RTN4RL2	Reticulon-4 receptor-like 2	N	112.037			1815.85	5844.74	4458.4	991.711	1565.98	2558.1
Q86UP0	CDH24	Cadherin-24	N	1795.46	535.695	1350.61	32280.9	47401.3	43967.5	23127.4	38171	45869.5
Q86VH4	LRRTM4	Leucine-rich repeat transmembrane neuronal protein 4	N				14430.4	33141.8	25545.8	8862.62	13978.7	17170.3
Q86WR0	CCDC25	Coiled-coil domain-containing protein 25	N	178.008	179.007	375.014	505.018		430.017	468.018	430.017	420.016
Q86WV6	STING1	Stimulator of interferon genes protein	N	1326.64	823.469	363.477	1088.54	2371.85	2318.4	1041.86	1786.85	1526.17
Q86XP1	DGKH	Diacylglycerol kinase eta	N				120.005	247.011	333.014		281.01	189.007
Q86XX4	FRAS1	Extracellular matrix organizing protein FRAS1	N	1014.82	715.229	744.56	18473.8	40730.1	40906.5	11377.8	20807.9	26444.8
Q86Y78	LYPD6	Ly6/PLAUR domain-containing protein 6	N				468.013	786.023	1446.05			996.028
Q86YR5	GPSM1	G-protein-signaling modulator 1	N	323.923	304.263	417.641	1105.76	2703.91	2853.95	929.288	1964.5	1229.43
Q86YS7	C2CD5	C2 domain-containing protein 5	N	487.636	532.738		1181.96	1397.42	2579.6	733.532	1386.72	997.691
Q86YT6	MIB1	E3 ubiquitin-protein ligase MIB1	N				189.006	561.019	258.007	379.013	607.017	308.008
Q8IUD2	ERC1	ELKS/Rab6-interacting/CAST family member 1	N	651.608		726.7	1112.98	2209.01	2782.89	959.844	1948.36	1097.05
Q8IVF7	FMNL3	Formin-like protein 3	N	481.723	285.975	261.497	285.483	1111.6	1111.85	517.212	1361.94	913.629
Q8IVT5	KSR1	Kinase suppressor of Ras 1	N					605.017	849.028		386.009
Q8IWT6	LRRC8A	Volume-regulated anion channel subunit LRRC8A	N	419.92	378.176	217.859	8726.12	21650.6	16665.5	4634.48	8633.54	10095.5
Q8IWV2	CNTN4	Contactin-4	N				4282.9	13079.5	11169.5	1919.69	4309.88	4493.84
Q8IWY4	SCUBE1	Signal peptide, CUB and EGF-like domain-containing protein 1	N				102.608	325.626	263.572		157.077	130.317
Q8IYB5	SMAP1	Stromal membrane-associated protein 1	N	1832.67	4351.39	3172.84	5578.97	6935.17	6605.44	3315.59	4798.53	3552
Q8IYR6	TMEFF1	Tomoregulin-1	N				4693.47	13054.3	9960.52	2548.62	4318.26	6046
Q8IZ07	ANKRD13A	Ankyrin repeat domain-containing protein 13A	N			261.287	583.357	802.151	918.096	686.55	645.247	655.831
Q8IZJ1	UNC5B	Netrin receptor UNC5B	N	592.823			10771.1	32575.3	24710.7	5686.79	10495.6	13393.8
Q8IZP9	ADGRG2	Adhesion G-protein coupled receptor G2	N				2341.88	3316.66	3304.25	1032.63	2022.47	2774.34
Q8IZY2	ABCA7	Phospholipid-transporting ATPase ABCA7	N			97.4444	348.914	454.856	486.468	261.947	194.889	364.69
Q8N0W4	NLGN4X	Neuroligin-4, X-linked	N				1173.06	2958.63	2008.88	835.134	780.957	1343.46
Q8N158	GPC2	Glypican-2	N	722.41	357.703		17476.4	51604.6	36417	10947.3	18193.4	23592.8
Q8N1I0	DOCK4	Dedicator of cytokinesis protein 4	N	870.595	813.991	620.534	1235.08	1619.29	1678.06	1281.04	1820.82	1664.37
Q8N2G4	LYPD1	Ly6/PLAUR domain-containing protein 1	N				400.014	1619.06	1519.06	278.011	611.021	359.013
Q8N3J6	CADM2	Cell adhesion molecule 2	N				596.016	2307.07	2146.07		1060.03	1008.03
Q8N3R9	PALS1	Protein PALS1	N	287.745		192.093	323.534	675.853	924.865	331.545	605.849	607.556
Q8N5H7	SH2D3C	SH2 domain-containing protein 3C	N	449.011	432.011		3200.09	6152.15	5195.14	1802.04	2270.05	2981.07
Q8NB49	ATP11C	Phospholipid-transporting ATPase IG	N	1692.95	1199.33	1219.92	3825.22	7412.13	6266.89	3400.27	4970.22	5073
Q8NBJ9	SIDT2	SID1 transmembrane family member 2	N	181.165				302.867	430.041		183.943	374.037
Q8NBU5	ATAD1	Outer mitochondrial transmembrane helix translocase	N	314.84		636.384	1097.13	1798.23	2299.82	601.089	1794.97	866.974
Q8NC96	NECAP1	Adaptin ear-binding coat-associated protein 1	N		327.01		601.02	955.032	1754.05	400.013	1585.05	906.024
Q8NCG7	DAGLB	Diacylglycerol lipase-beta	N	518.485	509.663	909.306	1516.16	2281.91	2530.27	951.56	1066.63	1252.61
Q8NCM8	DYNC2H1	Cytoplasmic dynein 2 heavy chain 1	N	2377.17	2476.52	2865.47	3501.27	4893.28	7195.39	3450.06	5317.44	6114.67
Q8NCT1	ARRDC4	Arrestin domain-containing protein 4	N					749.019
Q8ND76	CCNY	Cyclin-Y	N				367.016	531.022	847.037		717.032	356.015
Q8NE01	CNNM3	Metal transporter CNNM3	N	273.946			1567.58	2564.1	3131.79	1275.53	1884.23	2827.69
Q8NE79	BVES	Blood vessel epicardial substance	N				1334.33	3526.29	2581.53	967.621	888.333	1090.83
Q8NEU8	APPL2	DCC-interacting protein 13-beta	N	1014.75	1119.41	1250.66	2236.31	3906.41	4510.37	1847.13	3186.24	2730.59
Q8NF37	LPCAT1	Lysophosphatidylcholine acyltransferase 1	N	894.623	811.2	936.528	2253.2	3859.79	4222.37	1703.18	2695.92	2575.51
Q8NF50	DOCK8	Dedicator of cytokinesis protein 8	N	4766.12	2781.6	2697.81	1125.44	3202.21	3295.77	4292.86	5881.32	4567.71
Q8NFJ6;Q8TCW9	PROKR1;PROKR2	Prokineticin receptor 2	N		260.008		461.013	814.026	647.019		629.022
Q8NFM7	IL17RD	Interleukin-17 receptor D	N	784.891		296.565	3070.57	6575.64	7084.84	1633.09	2708.26	2858.41
Q8NFP4	MDGA1	MAM domain-containing glycosylphosphatidylinositol anchor protein 1	N				1490.27	3618.36	3069.54	1122.08	1784.5	1612.99
Q8NFT2	STEAP2	Metalloreductase STEAP2	N	366.022	367.715		1528.12	1493.96	2200	908.416	1189.23	1429.56
Q8NFY4	SEMA6D	Semaphorin-6D	N				1435.88	2821.13	4072.75	775.621	1592.27	2492.46
Q8NFZ4	NLGN2	Neuroligin-2	N		155.725	228.498	8504.69	25115.3	21609.1	4863.4	9043.42	11708
Q8NG11	TSPAN14	Tetraspanin-14	N	293.267	858.205	406.576	4436.08	10325	8844.62	2415.2	4305.57	4418.23
Q8NHG7	SVIP	Small VCP/p97-interacting protein	N	919.028	424.013	635.022	988.031	895.027	955.037	899.032	1032.03	1257.04
Q8TAC9	SCAMP5	Secretory carrier-associated membrane protein 5	N	198.006			268.008	514.017	568.018	555.017	549.018	395.012
Q8TAD4	SLC30A5	Zinc transporter 5	N	631.02	260.008	278.008	1538.34	1941.06	1751.05	1163.04	2030.74	1897.06
Q8TBR7	TLCD3A	TLC domain-containing protein 3A	N	2464.92	1920	2132.61	3535.64	4395.21	3781.85	3831.62	4754.91	4576.87
Q8TCT9	HM13	Minor histocompatibility antigen H13	N	10311.6	7390.11	6352.35	11882.1	16204.6	11482.5	13025.9	14307.4	12857.3
Q8TCZ2	CD99L2	CD99 antigen-like protein 2	N				3918.29	12226.9	8711.36	2706.19	3880.53	5732.42
Q8TD43	TRPM4	Transient receptor potential cation channel subfamily M member 4	N	207.869			636.168	380.549	487.146	259.998	535.713	425.192
Q8TDM6	DLG5	Disks large homolog 5	N	775.997	669.301	710.528	1285.12	1884.7	2720.73	1032.61	1514.86	1362.53
Q8TDY8	IGDCC4	Immunoglobulin superfamily DCC subclass member 4	N				812.17	1160.14	1372.18	264.055		859.676
Q8TEU7	RAPGEF6	Rap guanine nucleotide exchange factor 6	N	393.549	106.123	448.98	418.899	739.031	733.381	312.206	663.636	399.29
Q8TEW0	PARD3	Partitioning defective 3 homolog	N	616.415	404.411	433.224	1158.1	2060.75	2386.98	1089.93	1638.72	1179.71
Q8TF72	SHROOM3	Protein Shroom3	N	406.726		148.15	518.222	1393.48	1756.58	197.955	684.566	556.368
Q8WTV0	SCARB1	Scavenger receptor class B member 1	N				5110.21	12143.5	10550.6	2798.59	4052.11	6126.01
Q8WUD1	RAB2B	Ras-related protein Rab-2B	N			515.01	355.218	796.44	1099.2	226.306	815.368	359.617
Q8WUG5	SLC22A17	Solute carrier family 22 member 17	N				764.023	1177.04	2238.06	440.012	1016.03	997.027
Q8WUJ3	CEMIP	Cell migration-inducing and hyaluronan-binding protein	N					275.008
Q8WWI5	SLC44A1	Choline transporter-like protein 1	N	474.69	827.478	1046.18	2660.22	7487.71	5900.5	1605.04	3107.06	4340.52
Q8WWN8	ARAP3	Arf-GAP with Rho-GAP domain, ANK repeat and PH domain-containing protein 3	N	2163.02	1306.67	1319.5	2486.8	3846.89	4462.81	2650.16	4024.94	3401.77
Q8WXG6	MADD	MAP kinase-activating death domain protein	N	614.666	583.198	819.695	792.653	1314.32	1226.69	876.355	1543.76	885.911
Q8WXH0	SYNE2	Nesprin-2	N	595.227	520.707	827.779	1318.85	2442.45	2622.58	1048.39	1621.82	1552.22
Q8WXX5	DNAJC9	DnaJ homolog subfamily C member 9	N	168.021		382.095	1414.37	1923.37	2177.66	967.563	1284.63	619.237
Q92485	SMPDL3B	Acid sphingomyelinase-like phosphodiesterase 3b	N				2178.55	5755.98	5038.43	1462.48	1860.44	2557.29
Q92508	PIEZO1	Piezo-type mechanosensitive ion channel component 1	N	1421.17	798.428	809.03	1892.71	3685.53	3200.98	1683.75	2699.89	2528.06
Q92536	SLC7A6	Y+L amino acid transporter 2	N	109.982	440.927	310.948	3042.1	4404.79	4671.62	1623.73	2746.93	3663.82
Q92556	ELMO1	Engulfment and cell motility protein 1	N					316.905	426.557	203.376	377.793	320.376
Q92597	NDRG1	Protein NDRG1	N		135.004		454.016	728.024	639.02	207.008	461.012	139.005
Q92629	SGCD	Delta-sarcoglycan	N				900.55	3023.06	2318.33	452.643	736.737	896.355
Q92673	SORL1	Sortilin-related receptor	N	1468.94	2691.63		6628.57	17536.9	15105.8	4582.02	7639.16	9086.39
Q92692	NECTIN2	Nectin-2	N	862.549	394.333	508.099	23267.2	69980.4	53167.8	12231.4	21122.2	28552.5
Q92729	PTPRU	Receptor-type tyrosine-protein phosphatase U	N			192.472	7664.24	24953.3	21200.6	4155.57	7513.16	10532.7
Q92743	HTRA1	Serine protease HTRA1	N				1114.65	3011.35	2450.4	1095.01	949.388	1321.84
Q92797	SYMPK	Symplekin	N	216.057	246.525	183.249	1157.75	1984.57	1728.56	816.148	1892.01	983.641
Q92823	NRCAM	Neuronal cell adhesion molecule	N	888.559	833.086	829.716	133458	542964	311612	51415.4	89676.8	125991
Q92854	SEMA4D	Semaphorin-4D	N				624.638	1303.9	1149.22	538.977	607.341	693.162
Q92859	NEO1	Neogenin	N	534.714	322.733	1010.76	48893.7	150015	112073	29863.1	52435.3	70270.5
Q92930	RAB8B	Ras-related protein Rab-8B	N	919.035				1421.05	656.028	467.018	1350.05	1118.04
Q92959	SLCO2A1	Solute carrier organic anion transporter family member 2A1	N				753.219	777.213	1068.04	237.178	498.999	790.021
Q93052	LPP	Lipoma-preferred partner	N	1621.44	1133.58	1424.64	5737.16	8454.9	11133.7	3627.61	6085.45	4611.18
Q93100	PHKB	Phosphorylase b kinase regulatory subunit beta	N				701.28	833.276	1026.94	1173.36	979.789	565.791
Q969I6	SLC38A4	Sodium-coupled neutral amino acid transporter 4	N				2896.7	9092.55	7385.9	1942.23	2563.42	3529.11
Q969P0	IGSF8	Immunoglobulin superfamily member 8	N	1643.26	1179.12	801.228	56580.4	172595	128350	33731.1	54606.6	62031.8
Q96A49	SYAP1	Synapse-associated protein 1	N	461.639			751.516	1323.8	1865.86	569.45	1273.58	486.312
Q96AC1	FERMT2	Fermitin family homolog 2	N	5036.56	3944.86	3409.36	8741.52	9697.21	9995.45	7440.63	12762.5	10085.3
Q96AD5	PNPLA2	Patatin-like phospholipase domain-containing protein 2	N	327.449			482.87		506.322
Q96BI1	SLC22A18	Solute carrier family 22 member 18	N	2435.23	1802.84	1201.3	2593.18	4007.12	3757.16	2526.08	3870.67	4030.89
Q96CP6	GRAMD1A	Protein Aster-A	N	827.632	361.714	409.708	1087.08	1799.95	2350.05	876.513	1266.42	933.561
Q96CW1	AP2M1	AP-2 complex subunit mu	N	2081.41	1587.93	1583.17	3774.13	4847.32	4871.06	3593.66	5802.23	4427.42
Q96CW9	NTNG2	Netrin-G2	N	348.525			3431.18	12130.5	7048.83	1733.05	2375.82	2763.89
Q96CX2	KCTD12	BTB/POZ domain-containing protein KCTD12	N	132.713	191.881	569.699	1001.61	1440.08	2108.04	699.524	914.631	1071.22
Q96D53	COQ8B	Atypical kinase COQ8B, mitochondrial	N					141.003	182.005		445.014	242.006
Q96E17	RAB3C	Ras-related protein Rab-3C	N	2863.08	2039.06	1545.04	6739.18	7745.23	7343.21	2227.06	6735.18	5888.17
Q96EV8	DTNBP1	Dysbindin	N				27.0008	352.014	757.027	178.008	544.019	265.009
Q96EY1	DNAJA3	DnaJ homolog subfamily A member 3, mitochondrial	N	814.187	686.068	617.518	2742.01	3983.44	4721.78	2222.01	3258.7	2187.04
Q96FE5	LINGO1	Leucine-rich repeat and immunoglobulin-like domain-containing nogo receptor-interacting protein 1	N				3235.86	8343	6420.5	1986.89	3357.14	4553.08
Q96FE7	PIK3IP1	Phosphoinositide-3-kinase-interacting protein 1	N					582.018	240.011		139.006
Q96GC9	VMP1	Vacuole membrane protein 1	N	1965.03	1424.02	1365.02	3272.05	4848.08	4887.25	1989.03	3273.76	3376.06
Q96GD0	PDXP	Chronophin	N	512.013	638.019	769.023	1036.03	1177.03	1374.03		1184.03	1021.03
Q96IF1	AJUBA	LIM domain-containing protein ajuba	N				310.595	531.164	766.379			95.3524
Q96J02	ITCH	E3 ubiquitin-protein ligase Itchy homolog	N	243.412	177.312		632.48	500.138	885.062	306.698	676.803	499.514
Q96J84	KIRREL1	Kin of IRRE-like protein 1	N				8745.05	30502.3	21630.3	3492.83	6826.36	7127.37
Q96JA1	LRIG1	Leucine-rich repeats and immunoglobulin-like domains protein 1	N				2445	4824.68	4982.85	1303.54	2601.84	3174.87
Q96JQ0	DCHS1	Protocadherin-16	N	6227.96	3072.1	4531.1	193199	291792	321361	113599	177659	261387
Q96NE9	FRMD6	FERM domain-containing protein 6	N	419.027		460.731	1359.23	1690.49	2245.92	806.597	1574.91	1413.6
Q96NW4	ANKRD27	Ankyrin repeat domain-containing protein 27	N				277.61	647.706	698.295	337.585	330.825	314.436
Q96P48	ARAP1	Arf-GAP with Rho-GAP domain, ANK repeat and PH domain-containing protein 1	N	2865.37	1916.34	1538.47	3148.96	5352.89	4803.19	3338.8	5127.77	5535.33
Q96PE1	ADGRA2	Adhesion G protein-coupled receptor A2	N				6882.22	14948.9	23753.3	3636.78	9723.71	11132.9
Q96PE3	INPP4A	Inositol polyphosphate-4-phosphatase type I A	N	318.131	363.021		729.927	1111.59	1556.88	619.441	1027.09	363.765
Q96QD8	SLC38A2	Sodium-coupled neutral amino acid transporter 2	N	260.663	245.765	139.049	573.097	1498.11	1338.77	1004.31	894.726	1555.74
Q96QU1	PCDH15	Protocadherin-15	N				385.753	533.949	648.887			617.936
Q96QZ7	MAGI1	Membrane-associated guanylate kinase, WW and PDZ domain-containing protein 1	N				678.759	743.175	869.552	192.342	369.276	738.028
Q96RD7	PANX1	Pannexin-1	N				549.015	976.02	868.018		458.011	926.02
Q96RT1	ERBIN	Erbin	N	201.289	182.824		540.029	1073.17	1233.92	242.26	660.143	530.556
Q96RU3	FNBP1	Formin-binding protein 1	N	240.998			983.988	1314.99	2268.02	859.99	1128.61	720.991
Q96S59	RANBP9	Ran-binding protein 9	N	1043.92	603.189	651.504	1699.62	2348.58	3414.32	1188.04	1992.29	1887.36
Q96SB3	PPP1R9B	Neurabin-2	N				794.5	1923.06	1531.85	696.711	815.713	852.425
Q96TA1	NIBAN2	Protein Niban 2	N	837.824	953.502	912.588	2754.49	5136.22	5662.82	2948.91	4247.1	3431.58
Q99250	SCN2A	Sodium channel protein type 2 subunit alpha	N	1243.03	360.752	1682.66	873.934	2050.2	2208.52	910.95	1298.12	1645.81
Q99497	PARK7	Parkinson disease protein 7	N	6675.92	6986.05	6645.93	13406.2	10068.7	15627.5	6480.33	9418.76	7698.39
Q99523	SORT1	Sortilin	N	928.878	435.456	549.568	5424.1	13463.5	11570.1	3138.5	5436.72	6657.01
Q99569	PKP4	Plakophilin-4	N	243.411	70.4508		519.604	641.222	731.025	222.165	460.016	577.478
Q99623	PHB2	Prohibitin-2	N	2542.15	1979.87	2839.13	8629.55	12120.3	11655.7	4470.27	7221.67	4521.27
Q99720	SIGMAR1	Sigma non-opioid intracellular receptor 1	N	475.726	777.528	518.694	969.792	1773.44	1781.77	810.753	1155.27	1235.16
Q99755	PIP5K1A	Phosphatidylinositol 4-phosphate 5-kinase type-1 alpha	N	249.626	194.103	352.211	663.545	973.714	1127.36	487.635	951.458	655.641
Q99788	CMKLR1	Chemerin-like receptor 1	N		421.978	143.993	2042.98	3016.28	4327.93	1321.94	1690.5	2993.92
Q99808	SLC29A1	Equilibrative nucleoside transporter 1	N	676.231	888.314	674.99	1572.86	2286.18	1585.2	1173.72	1736.17	1494.71
Q99829	CPNE1	Copine-1	N	3327.72	2769.22	2458.72	5549.91	9330.49	11801.9	4913.96	7910.32	7605.9
Q99942	RNF5	E3 ubiquitin-protein ligase RNF5	N		295.007	232.006	897.024	1179.03	1570.04	687.019	465.013	852.027
Q9BPZ7	MAPKAP1	Target of rapamycin complex 2 subunit MAPKAP1	N		115.004		258.008	577.018	359.012	150.004	523.017
Q9BQ51	PDCD1LG2	Programmed cell death 1 ligand 2	N	24866			16563.9	40918.5	27698.9	8426.55	12169.5	15597.3
Q9BSJ8	ESYT1	Extended synaptotagmin-1	N	2270.73	2033.76	2033.08	6725.71	12090.3	14925.8	5013.2	8357.72	7297.62
Q9BTN0	LRFN3	Leucine-rich repeat and fibronectin type-III domain-containing protein 3	N				4453.52	6189.1	10306.4	2547.98	4548.85	7267.5
Q9BTU6	PI4K2A	Phosphatidylinositol 4-kinase type 2-alpha	N	256.653	401.14	221.467	1041.26	1569.56	1760.27	789.831	933.774	688.755
Q9BTW9	TBCD	Tubulin-specific chaperone D	N	2037.25	1829.94	1643.86	4497.43	6054.87	7848.9	3354.49	6344.54	4631.13
Q9BV57	ADI1	Acireductone dioxygenase	N	750.018			1323.03	1280.04	1764.04		983.023	1572.03
Q9BVK8	TMEM147	Transmembrane protein 147	N							171.008	503.025	370.018
Q9BVT8	TMUB1	Transmembrane and ubiquitin-like domain-containing protein 1	N	1166.89	479.676	771.936	2389.73	3452.18	3735.6	2375.71	2023.86	2230.04
Q9BWV1	BOC	Brother of CDO	N				1153.75	2948.6	2396.35	363.288	1086.09	1647.45
Q9BX67	JAM3	Junctional adhesion molecule C	N			605.211	5395.86	15040	12505.3	3445.7	4712.24	4912.92
Q9BX79	STRA6	Receptor for retinol uptake STRA6	N	2550.11	2645.63	2425.48	23524.6	57041.2	49730.8	14498.3	21971.4	27760.5
Q9BXB1	LGR4	Leucine-rich repeat-containing G-protein coupled receptor 4	N	208.475			5399.66	7531.62	14819.3	2652.01	5977.72	9420.91
Q9BXJ8	TMEM120A	Ion channel TACAN	N	1025.93	955.925	1058.05	1132.13	1869.25	2319.4	1572.38	2178.78	2011.35
Q9BXP2	SLC12A9	Solute carrier family 12 member 9	N	897.494	699.997	658.476	1845.77	2823.41	3799.46	1447.02	2168.52	2212.59
Q9BY67	CADM1	Cell adhesion molecule 1	N				14822.4	57732	36969.2	7534.31	11375.9	15318.4
Q9BZF2	OSBPL7	Oxysterol-binding protein-related protein 7	N				742.714	1236.96	1550.78	490.811	462.818
Q9BZF3	OSBPL6	Oxysterol-binding protein-related protein 6	N	164.666	134.576	232.626	557.7	962.228	1255.46	512.514	617.036	624.718
Q9BZL6	PRKD2	Serine/threonine-protein kinase D2	N	161.885	188.743	430.395	554.282	702.22	1080.55	447.088	695.006	593.425
Q9BZM4	ULBP3	UL16-binding protein 3	N			2390.13	1679.67	3567.68	2856.22	1208.89	1504.06	2280.17
Q9BZM5	ULBP2	UL16-binding protein 2	N				883.037	1793.06	2369.09	1254.05	455.014	1454.05
Q9BZR6	RTN4R	Reticulon-4 receptor	N				3200.18	9526.72	7478.89	3028.73	3404.17	4959.54
Q9C0A0	CNTNAP4	Contactin-associated protein-like 4	N			776.025	2607.28	5388.78	6312.99	1664.75	2914.85	4204.95
Q9C0B5	ZDHHC5	Palmitoyltransferase ZDHHC5	N	1699.98	2211.83	1308.98	2473.06	4522.84	3016.65	2159.91	2470.29	3946.7
Q9C0H2	TTYH3	Protein tweety homolog 3	N				360.495	941.059	749.121	308.464	477.829	401.046
Q9GZM5	YIPF3	Protein YIPF3	N	914.714	975.918	749.493	991.358	1634.85	1328.55	640.304	846.145	1003.38
Q9GZV3	SLC5A7	High affinity choline transporter 1	N	493.93	482.008	401.873	1542.63	2104.88	2285.19	1106.46	2001.98	1991.78
Q9H0H5	RACGAP1	Rac GTPase-activating protein 1	N	490.386		328.616	807.009	1919.9	2288.93	839.059	987.955	790.119
Q9H0U3	MAGT1	Magnesium transporter protein 1	N	5713.62	8052.13	2862.79	24568.4	35189.9	27310.9	19013.1	35942.7	38930.4
Q9H158	PCDHAC1	Protocadherin alpha-C1	N				726.441	1549.34	1987.88		775.127	1466.14
Q9H1P3	OSBPL2	Oxysterol-binding protein-related protein 2	N	233.87		116.489	379.594	640.883	733.038	160.68	779.29	389.833
Q9H223	EHD4	EH domain-containing protein 4	N	703.311	990.656	846.436	1975.32	3749.47	3976.58	2008.91	2881.23	1753.11
Q9H2E6	SEMA6A	Semaphorin-6A	N				631.601	1111.42	1317.02	242.973	538.407	709.716
Q9H2H9	SLC38A1	Sodium-coupled neutral amino acid transporter 1	N	436.01				960.029	1737.05	517.013	1509.04	1591.04
Q9H3T3	SEMA6B	Semaphorin-6B	N				1122.04		1081.04		549.025	744.024
Q9H4A6	GOLPH3	Golgi phosphoprotein 3	N	476.019		331.01	975.756	1073.89	1430.89	873.027	793.027	488.017
Q9H4L5	OSBPL3	Oxysterol-binding protein-related protein 3	N	643.874		460.096	997.429	2030.81	2322.9	954.913	1346.67	989.066
Q9H4M9	EHD1	EH domain-containing protein 1	N	618.844	871.406	818.276	3686.88	7849.08	8231.35	4942.34	5981.78	3534.02
Q9H5V8	CDCP1	CUB domain-containing protein 1	N	610.587			9483.91	29431	21436.3	6846.51	10755.8	13554.5
Q9H5Y7	SLITRK6	SLIT and NTRK-like protein 6	N	919.557	560.519	953.998	28951.5	81686.9	67791.2	15194.2	26784.9	35570
Q9H6B4	CLMP	CXADR-like membrane protein	Y				35012.8	100204	72498	16450	30727.1	36438.5
Q9H6X2	ANTXR1	Anthrax toxin receptor 1	N	798.343		387.654	45363.6	132871	97001.3	23251.5	42087.5	52053.3
Q9H7D0	DOCK5	Dedicator of cytokinesis protein 5	N	2068.38	1144.82	1206.76	2493.65	3584.88	3232.1	2195.27	4350.61	3066.92
Q9H813	PACC1	Proton-activated chloride channel	N				4058.13	10600.7	8085.87	3859.88	4160.56	4274.11
Q9H8M5	CNNM2	Metal transporter CNNM2	N				1042.14	1584.42	1041.06	594.095	1558.64	1268.06
Q9H9K5	ERVMER34-1	Endogenous retroviral envelope protein HEMO	N				545.548	1088.26	1318.97	446.932	592.911	587.91
Q9HAB3	SLC52A2	Solute carrier family 52, riboflavin transporter, member 2	N	712.016	248.006	320.009	2358.05	3419.09	5164.1	1593.03	3494.08	3185.08
Q9HAR2	ADGRL3	Adhesion G protein-coupled receptor L3	N		1003.91	520.484	4391.92	10516.4	10224.5	1987.62	3662.13	4672.48
Q9HB19	PLEKHA2	Pleckstrin homology domain-containing family A member 2	N	646.45	484.77	563.382	984.196	1310.58	1945.22	672.807	1435.99	1225.77
Q9HBM0	VEZT	Vezatin	N				1080.61	1449.62	1863.93	615.55	1031.01	1410.4
Q9HBT6	CDH20	Cadherin-20	N			79.0766	814.343	3119.21	2019.87	483.235	761.672	1288.97
Q9HBW1	LRRC4	Leucine-rich repeat-containing protein 4	N				832.136	3940.89	3090.88	658.59	912.593	1309.57
Q9HC56	PCDH9	Protocadherin-9	N			378.466	10776.2	24538.4	24350.7	5244.35	9305.52	14002.6
Q9HCE7	SMURF1	E3 ubiquitin-protein ligase SMURF1	N	460.132	246.499	1047.43	1816.18	2260.59	2492.25		1811.78	772.36
Q9HCE9	ANO8	Anoctamin-8	N	806.022	342.009		812.024	819.026	515.017	800.027	1342.04	891.027
Q9HCJ2	LRRC4C	Leucine-rich repeat-containing protein 4C	N				505.811	1325.25	1712.66		385.108	529.148
Q9HCL0	PCDH18	Protocadherin-18	N		580.839	256.928	19442.2	33258.9	39844.4	12307.8	26116.2	37842.6
Q9HCM2	PLXNA4	Plexin-A4	N	451.825		407.455	6638.68	25440.6	16164	3171.57	4684.81	7876.78
Q9HCM4	EPB41L5	Band 4.1-like protein 5	N	182.712			386.722	669.885	594.88	727.972	854.927	287.682
Q9HCN3	PGAP6	Post-GPI attachment to proteins factor 6	N				957.893	1609.89	2024.64	898.034	1365.31	1316.91
Q9HCU4	CELSR2	Cadherin EGF LAG seven-pass G-type receptor 2	N	494.592		201.462	17547.8	45498.5	38593.1	9727	16647.1	23151.9
Q9NP58	ABCB6	ATP-binding cassette sub-family B member 6	N	1311.69	1421.72	1112.61	2428.95	2351.68	2276.48	1900.22	3022.61	2717.64
Q9NP59	SLC40A1	Solute carrier family 40 member 1	N				2671.71	3785.95	6642.82	973.916	2043.4	2310.26
Q9NP72	RAB18	Ras-related protein Rab-18	N	2246.2	1418.95	1861.81	6192.6	8698.29	10918.4	3714.07	7384.01	5446.31
Q9NPF0	CD320	CD320 antigen	N	399.01			658.016	1573.04	1598.04	709.018	1134.03	602.014
Q9NPH3	IL1RAP	Interleukin-1 receptor accessory protein	N				700.564	3641.94	1975.49	551.219	754.424	981.563
Q9NPQ8	RIC8A	Synembryn-A	N				2470.02	3984.61	3544.29	1895.47	2572.72	2139.93
Q9NQC3	RTN4	Reticulon-4	N	1708.74	2135.82	1790.52	4916.5	6754.41	5085.79	3467.44	5704.13	4202.73
Q9NQC7	CYLD	Ubiquitin carboxyl-terminal hydrolase CYLD	N	295.012			519.018	795.03	1116.05			634.022
Q9NQS3	NECTIN3	Nectin-3	N				4683.14	14950.4	10482.3	2154.82	3070.73	3166.25
Q9NQX3	GPHN	Gephyrin	N	688.906	384.965	458.494	1310.95	1941.25	2308.9	1328.12	1757.73	1458.03
Q9NQX7	ITM2C	Integral membrane protein 2C	N			285.773	4757.56	5155.38	5757.64	2674.52	5335.8	6486.75
Q9NR82	KCNQ5	Potassium voltage-gated channel subfamily KQT member 5	N				285.007	880.022	849.019	184.004	258.007	480.013
Q9NRJ7	PCDHB16	Protocadherin beta-16	N	2487.63	1401.45	1176.05	59725.6	83823.7	95051.3	36227.1	60109.3	81152.9
Q9NRY4	ARHGAP35	Rho GTPase-activating protein 35	N	1733.55	1239.26	1211.96	2207.9	3375.21	3634.35	2269.72	3248.92	3159.91
Q9NRY6	PLSCR3	Phospholipid scramblase 3	N	316.557			1152.19	2718.04	2413.69	1098.73	1369.52	942.882
Q9NS86	LANCL2	LanC-like protein 2	N	238.018		146.012	449.035	925.252	731.624	350.026	515.131	572.043
Q9NT68	TENM2	Teneurin-2	N				674.031	1840.91	1183.37	361.811	498.32	495.251
Q9NT99	LRRC4B	Leucine-rich repeat-containing protein 4B	N	498.273	325.885	574.879	20625.2	57812.1	48048.9	10151.1	19981.8	27765.8
Q9NTN9	SEMA4G	Semaphorin-4G	N				1906.88	4269.06	5081.47	858.211	2982.1	2268.33
Q9NV70	EXOC1	Exocyst complex component 1	N	815.976	765.687		1308.57	2724.22	2571.76	1539.69	2210.68	1357.19
Q9NV96	TMEM30A	Cell cycle control protein 50A	N			184.819	7960.86	26082.7	19598.2	4275.97	8539.01	10466.9
Q9NVV5	AIG1	Androgen-induced gene 1 protein	N	1346.54	1065.01	1295.61	1545	2996.06	2269.39	1733.38	3724.49	3030.42
Q9NVZ3	NECAP2	Adaptin ear-binding coat-associated protein 2	N	592.465		628.042	1484.54	2011.74	2589.32	842.771	1279.9	1169.85
Q9NW15	ANO10	Anoctamin-10	N	620.854	689.339	659.007	1482.64	2049.48	1990.96	1210.02	1372.22	1771.26
Q9NX76	CMTM6	CKLF-like MARVEL transmembrane domain-containing protein 6	N	257.009			561.019	543.017	829.025		522.017	1054.03
Q9NXE4	SMPD4	Sphingomyelin phosphodiesterase 4	N	934.21	595.544	554.27	2221.69	3445.05	3364.74	1507.28	2249.26	2781.15
Q9NYQ6	CELSR1	Cadherin EGF LAG seven-pass G-type receptor 1	N		906.335		2406	5715.67	5476.48	1595.73	2540.41	3805.72
Q9NYQ7	CELSR3	Cadherin EGF LAG seven-pass G-type receptor 3	N	448.432	6146.62	292.669	5595.84	12133.3	11790.9	3664.58	5706.83	7533.59
Q9NZ56	FMN2	Formin-2	N				243.008	358.013	395.014	98.0032	444.017	91.0032
Q9NZ94	NLGN3	Neuroligin-3	N				3324.86	10311	8984.06	1988.63	4431.59	5086.66
Q9NZB2	FAM120A	Constitutive coactivator of PPAR-gamma-like protein 1	N	4147.95	3266.53	2700.21	9058.59	14061	22346.3	5959.49	9972.79	7800.44
Q9NZC3	GDE1	Glycerophosphodiester phosphodiesterase 1	N		266.051		742.14	591.105	324.48	353.222	198.979	372.312
Q9NZM1	MYOF	Myoferlin	N	37846.5	30033	27816	42005.7	60603.1	64461.8	44741.8	59253.2	64417.1
Q9NZM3	ITSN2	Intersectin-2	N	238.73	194.19	219.386	447.35	587.74	641.623	802.635	799.345	647.759
Q9NZN3	EHD3	EH domain-containing protein 3	N	228.574	265.426	401.652	1600	3519.13	3552.25	2837.49	2623.99	2227.66
Q9NZN4	EHD2	EH domain-containing protein 2	N	192.277	225.408		789.217	1535.79	1828.48	689.147	763.039	775.026
Q9NZQ7	CD274	Programmed cell death 1 ligand 1	N				7598.32	32193	20948.5	3766.09	6757.92	6825.57
Q9NZU0	FLRT3	Leucine-rich repeat transmembrane protein FLRT3	N				11423.1	34810.2	27166	5409.33	10460.5	12522.7
Q9NZU1	FLRT1	Leucine-rich repeat transmembrane protein FLRT1	N				782.148	1554.61	1994.12	520.983	900.546	1272.61
Q9NZV1	CRIM1	Cysteine-rich motor neuron 1 protein	N				2199.29	9072.7	6515.34	1462.28	2371.03	2368.92
Q9P0K1	ADAM22	Disintegrin and metalloproteinase domain-containing protein 22	N	862.051	423.751	168.35	26498.7	75182.4	56524.4	13034	22068.2	26751.5
Q9P0K9	FRRS1L	DOMON domain-containing protein FRRS1L	N					557.017				403.012
Q9P0L0	VAPA	Vesicle-associated membrane protein-associated protein A	N	1754.23	1432.74	1970.16	3666.36	5356.71	5805.84	3249.24	6413.3	3553.94
Q9P0L2	MARK1	Serine/threonine-protein kinase MARK1	N	472.782			475.553	862.674	644.813	260.266	248.664	266.833
Q9P121	NTM	Neurotrimin	N	42632.9	44035.5		27344.9	82666.4	68081.6	23936.2	25627	39246
Q9P232	CNTN3	Contactin-3	N			687.295	888.89	2572.1	1996.49	588.449	1046.06	1237.55
Q9P258	RCC2	Protein RCC2	N	7361.47	6637.72	6071.66	10624.6	14301.5	18263.6	8619.52	12301.2	10764.6
Q9P273	TENM3	Teneurin-3	N	1603.58	1069.27	999.608	35368.5	101216	92832	19744.8	37048.8	48884.4
Q9P2E7	PCDH10	Protocadherin-10	N	1410.25	803.98	739.101	21040.6	35672.7	38349	13018.9	21233.5	30811.4
Q9P2J2	IGSF9	Protein turtle homolog A	N	83.4309			1347.45	4142.9	3586.39	600.346	867.548	1476.05
Q9P2S2	NRXN2	Neurexin-2	N				1003.07	2764.25	2617.79	759.283	1354.07	1840.68
Q9UBC2	EPS15L1	Epidermal growth factor receptor substrate 15-like 1	N	123.665		113.066	441.666	317.577	436.912		527.708
Q9UBH6	XPR1	Xenotropic and polytropic retrovirus receptor 1	N	1479.75	1267.36	1463.65	3138.26	3674.06	2740.14	2184.28	2442.67	3702.22
Q9UBI6	GNG12	Guanine nucleotide-binding protein G(I)/G(S)/G(O) subunit gamma-12	N	1173.15	1157	1174.54	1315.57	1327.34	1058.17	1141.66	1528.05	1525.18
Q9UBN1	CACNG4	Voltage-dependent calcium channel gamma-4 subunit	N				1412.04	4643.13	4459.11		1255.03	1211.03
Q9UDY2	TJP2	Tight junction protein ZO-2	N	1349.2	1876.48	960.912	4357.17	7204.21	8849.07	3654.94	5061.51	3433.73
Q9UEY8	ADD3	Gamma-adducin	N	1242.18	757.142	824.98	1648.54	2382.12	2365.77	1430.76	2794.62	1782.4
Q9UGH3	SLC23A2	Solute carrier family 23 member 2	N		167.003		714.009	1517.96	1194.81	110.002	480.007	820.014
Q9UGT4	SUSD2	Sushi domain-containing protein 2	N				596.626	2849.84	2245.85		764.847	894.418
Q9UH65	SWAP70	Switch-associated protein 70	N	114.117	484.821	358.373	1349.71	1752.14	2015.59	726.171	1307.98	1234.47
Q9UHB6	LIMA1	LIM domain and actin-binding protein 1	N	2495.49	1499.71	2220.7	9213.68	12067.8	15500.6	5317.28	8880.42	6227.14
Q9UHN6	CEMIP2	Cell surface hyaluronidase	N	277.58		600.189	4870.84	14516.6	11523.8	2857.14	4911.52	4933.84
Q9UIG8	SLCO3A1	Solute carrier organic anion transporter family member 3A1	N				493.016	843.025	550.014		516.014	557.017
Q9UIQ6	LNPEP	Leucyl-cystinyl aminopeptidase	N	257.465	716.789	355.002	5286.05	13018.8	12134.2	2919.61	5354.45	5835.87
Q9UIW2	PLXNA1	Plexin-A1	N	1131.67	688.251	633.167	21735.6	63566.2	50205.2	10366.7	19819.2	24896.5
Q9UJQ1	LAMP5	Lysosome-associated membrane glycoprotein 5	N		145.429	182.539	3889.02	7722.8	6075.67	2163.11	3254.53	2665.27
Q9UJU6	DBNL	Drebrin-like protein	N	1637.51	1261.84	1969.68	5910.21	9353.47	11156.8	3460.2	6275.74	4019.71
Q9UJZ1	STOML2	Stomatin-like protein 2, mitochondrial	N	1884.66	1307.24	2068.17	7038.47	11561.4	10752.5	4804.75	7000.04	6144.13
Q9UK41	VPS28	Vacuolar protein sorting-associated protein 28 homolog	N				923.156	1962.75	1498.9	687.792	903.592	814.527
Q9UKS6	PACSIN3	Protein kinase C and casein kinase substrate in neurons protein 3	N				149.005	410.014	277.012		224.008
Q9UL26	RAB22A	Ras-related protein Rab-22A	N	601.409	213.121	433.937	676.04	1218.64	1439.74	735.68	1291.57	941.477
Q9ULB1	NRXN1	Neurexin-1	N				40068.2	84351.4	84974.1	19723.3	34681.2	48647.3
Q9ULC3	RAB23	Ras-related protein Rab-23	N	344.868	345.001	434.902	978.085	1408.82	1283.44	926.776	989.498	831.816
Q9ULH4	LRFN2	Leucine-rich repeat and fibronectin type-III domain-containing protein 2	N				477.235	1126.85	1202.48	321.748	590.367	666.024
Q9ULI3	HEG1	Protein HEG homolog 1	N				1193.27	2499.35	1662.52	712.48	742.097	839.403
Q9ULL4	PLXNB3	Plexin-B3	N				1839.89	5470.22	4874.87	1541.5	1849.36	2339.23
Q9ULP9	TBC1D24	TBC1 domain family member 24	N	982.144	521.08	629.863	1497.44	1967.58	2738.29	1129.25	2695.3	1537.23
Q9ULV4	CORO1C	Coronin-1C	N	6106.07	5120.39	5569.93	10185.3	13302.4	17096	7035.41	11770.1	8956.23
Q9ULZ9	MMP17	Matrix metalloproteinase-17	N				1032.52	4451.94	3034.21	673.751	1519.89	1710.93
Q9UM47	NOTCH3	Neurogenic locus notch homolog protein 3	N	448.227	673.344		12288.7	30164.8	28645.9	6840.18	13121.7	14488.6
Q9UM73	ALK	ALK tyrosine kinase receptor	N	322.542		925.46	3154.57	7500.8	7615	2183.71	3953.24	4114.52
Q9UMX0	UBQLN1	Ubiquilin-1	N					336.009	408.012
Q9UN66	PCDHB8	Protocadherin beta-8	N	1082.15	1038.77	501.64	16781.5	23569.6	28338.8	12656.1	19427.2	28178.6
Q9UN67	PCDHB10	Protocadherin beta-10	N				908.314	1161.22	1376.99	594.271	898.063	1335.03
Q9UN70	PCDHGC3	Protocadherin gamma-C3	N	7560.09	3087.04	6302.62	215262	303421	381698	132288	210171	314610
Q9UN74	PCDHA4	Protocadherin alpha-4	N	385.745			8938.4	10860.2	14097.9	4628.62	7688.65	13112.9
Q9UNF0	PACSIN2	Protein kinase C and casein kinase substrate in neurons protein 2	N				766.097	1879.41	2575.94	859.457	924.183	809.219
Q9UP38	FZD1	Frizzled-1	N	1276.36			3368.82	6668.82	6561.58		3136.58	3353.89
Q9UP95	SLC12A4	Solute carrier family 12 member 4	N				998.534	1090.29	1413.8	671.145	2067.58	721.22
Q9UPN3	MACF1	Microtubule-actin cross-linking factor 1, isoforms 1/2/3/4/5	N	2003.15	1653.31	3244.25	3793.66	5269.79	6939.09	3094.4	4805.23	5257.71
Q9UPT5	EXOC7	Exocyst complex component 7	N	243.068	304.783		1153.2	2064	2015.34	1152.29	1870.01	1025.94
Q9UPW8	UNC13A	Protein unc-13 homolog A	N									646.03
Q9UPX0	IGSF9B	Protein turtle homolog B	N				2551.77	10432.9	7821.96	1181.54	2158.79	2759.27
Q9UPZ6	THSD7A	Thrombospondin type-1 domain-containing protein 7A	N	2427.12	2042.88	1842.53	89033.6	239156	193192	57452.6	89057.2	117095
Q9UQ52	CNTN6	Contactin-6	N				216.008	1153.04	760.024
Q9UQC2	GAB2	GRB2-associated-binding protein 2	N	278.988			471.954	784.082	934.479	438.878	960.018	531.75
Q9Y230	RUVBL2	RuvB-like 2	N	3743.45	2926.76	3496.67	19179.9	28132.4	29445.4	10839	17429.6	12813.2
Q9Y265	RUVBL1	RuvB-like 1	N	4191.76	3962.09	4731.64	22343.8	35807	36074.8	12824.4	17662.4	15463.9
Q9Y287	ITM2B	Integral membrane protein 2B	N	543.086	440.123	570.093	4350.96	6906.02	6877.98	4155.51	6026.32	7988.21
Q9Y289	SLC5A6	Sodium-dependent multivitamin transporter	N	399.912	537.512	403.361	4752.6	15118	12150.3	2326.86	3977.42	5366.54
Q9Y296	TRAPPC4	Trafficking protein particle complex subunit 4	N				351.259	627.81	668.626	198.733	769.208	448.03
Q9Y2A7	NCKAP1	Nck-associated protein 1	N	2313.12	1788.62	1550.71	4381.08	6160.56	7194.35	3793.64	5702.42	4279.08
Q9Y2H9	MAST1	Microtubule-associated serine/threonine-protein kinase 1	N	1269.05	1029.14	1066.71	1632.87	1829.59	1745.83	1771.43	2622.44	2104.05
Q9Y2I2	NTNG1	Netrin-G1	N	2205.86			1644.99	6205.62	3892.19	812.489	1394.09	2571.91
Q9Y2J0	RPH3A	Rabphilin-3A	N	255.708	259.34		636.844	1067.12	1527.97	333.077	812.716	629.726
Q9Y2J2	EPB41L3	Band 4.1-like protein 3	N	221.363			562.352	938.532	987.513	421.788	682.804	621.192
Q9Y2P4	SLC27A6	Long-chain fatty acid transport protein 6	N	501.504	413.904	882.064	1055.55	1722.89	1511.76	836.098	1496.89	1283.85
Q9Y2Q0	ATP8A1	Phospholipid-transporting ATPase IA	N	125.003	337.008	101.002	163.003	449.013	158.004	450.011	433.009	276.007
Q9Y3L3	SH3BP1	SH3 domain-binding protein 1	N	278.92	206.262	95.5851	756.512	1223.69	963.096	736.683	822.709	734.36
Q9Y3Q0	NAALAD2	N-acetylated-alpha-linked acidic dipeptidase 2	N				3056.38	12963.5	9232.37	1740.65	3360.56	4240.07
Q9Y3S1	WNK2	Serine/threonine-protein kinase WNK2	N					481.019	521.018		433.017
Q9Y487	ATP6V0A2	V-type proton ATPase 116 kDa subunit a 2	N	438.546			1334.43	1994.12	2174.63	1010.24	1535.75	1231.06
Q9Y4B5	MTCL1	Microtubule cross-linking factor 1	N	745.975		763.108	1267.8	1580.1	2689.2	652.805	1566.59	1199.77
Q9Y4C2	TCAF1	TRPM8 channel-associated factor 1	N	2857.41	2580.13	2285.35	4714.72	6981.83	8444.57	3687.22	6112.65	5818.63
Q9Y4D7	PLXND1	Plexin-D1	N					897.518	880.808	492.612	325.838	700.35
Q9Y4F1	FARP1	FERM, ARHGEF and pleckstrin domain-containing protein 1	N	848.303	644.69	674.13	1564.05	1884.22	2381.78	1079.84	2251.57	1899.29
Q9Y4G6	TLN2	Talin-2	N	2223.11	1848.89	1919.49	3475.84	5129.26	6094.25	3350.79	5119.57	4206.9
Q9Y4G8	RAPGEF2	Rap guanine nucleotide exchange factor 2	N	638.966	1166.2		720.492	1487.27	1785.23	542.071	1516.82	1282.65
Q9Y5E1	PCDHB9	Protocadherin beta-9	N	893.299	270.363		9193.16	13602.7	15446.1	6932.52	11171.2	15067.1
Q9Y5E2	PCDHB7	Protocadherin beta-7	N	611.209	269.16	3590.94	10113.8	13878.9	16658.8	8029.62	13202.3	17201
Q9Y5E3	PCDHB6	Protocadherin beta-6	N	2139.92	1069.13	856.909	52148.6	66864.2	81158.6	32143.3	51601.8	68229.7
Q9Y5E5	PCDHB4	Protocadherin beta-4	N	1155.38	518.289	412.112	21671.9	26403.2	29651	12237.9	20655.5	28538.9
Q9Y5E6	PCDHB3	Protocadherin beta-3	N	1814.89	915.518	728.3	29639.1	41459.8	44688.5	16060.2	28874.3	39179.6
Q9Y5E7	PCDHB2	Protocadherin beta-2	N	823.262	487.676	1042.18	11508.1	14084	16588.8	7362.93	13187	17047.3
Q9Y5E8	PCDHB15	Protocadherin beta-15	N	642.065	521.058	739.943	9059.26	11265	11760.3	4475.93	7523.97	10665
Q9Y5E9	PCDHB14	Protocadherin beta-14	N	12752.4	5457.57	4297.32	256850	317742	406210	155941	278021	376286
Q9Y5F0	PCDHB13	Protocadherin beta-13	N	541.028		420.35	5536.98	6972.14	7474.49	3248.95	6457.03	8794.13
Q9Y5F1	PCDHB12	Protocadherin beta-12	N	895.784	766.05	260.42	23237.2	28589.8	34717.5	13586.7	22765	32100.4
Q9Y5F2	PCDHB11	Protocadherin beta-11	N				2850.59	3407.62	4055.05	1461.26	2251.33	3077.23
Q9Y5F6	PCDHGC5	Protocadherin gamma-C5	N	4003.17	829.553	10392.9	27497.2	35775	42165.3	15050.2	30513.8	39788.4
Q9Y5F7	PCDHGC4	Protocadherin gamma-C4	N	1097.98	615.685	1082.45	17027.5	22537.5	22687.7	9966.68	15692.7	20410.5
Q9Y5F8	PCDHGB7	Protocadherin gamma-B7	N	6793.35	3830.87	6793	151532	215154	232824	89813.1	138716	205484
Q9Y5F9	PCDHGB6	Protocadherin gamma-B6	N		464.011	583.014	1009.02	1382.6	3400.07	687.186		1195.85
Q9Y5G0	PCDHGB5	Protocadherin gamma-B5	N				1702.36	2295.26	2358.04	995.295	1813.19	2101.35
Q9Y5G1	PCDHGB3	Protocadherin gamma-B3	N				797.559	1896.28	1986.36	856.708	1725.6	2625.26
Q9Y5G2	PCDHGB2	Protocadherin gamma-B2	N	1178.17	214.64	723.637	26396.2	33744.8	50786.7	15360.8	25411.8	42313.8
Q9Y5G3	PCDHGB1	Protocadherin gamma-B1	N	513.338		575.553	12005.1	16012.9	17908.6	6798.31	12426.9	16236.6
Q9Y5G4	PCDHGA9	Protocadherin gamma-A9	N				3407.14	5656.27	7523.55	1325.76	3590.18	5224.58
Q9Y5G6	PCDHGA7	Protocadherin gamma-A7	N	1232.22	528.298	834.173	33010.5	54739.9	58550.3	19364	33354.2	51054.5
Q9Y5G7	PCDHGA6	Protocadherin gamma-A6	N				5349.87	9465.89	11548.9	3292.03	5234.69	8758.84
Q9Y5G9	PCDHGA4	Protocadherin gamma-A4	N				9287.82	15013.7	16726.5	4592.81	6867.96	11410.6
Q9Y5H0	PCDHGA3	Protocadherin gamma-A3	N				373.606	1130.37	741.407			462.863
Q9Y5H1	PCDHGA2	Protocadherin gamma-A2	N				1915.21	2931.38	3338.41	1368.76	2532.97	3323.91
Q9Y5H3	PCDHGA10	Protocadherin gamma-A10	N	5856.66	10120.2	10245.2	7142.21	14529.5	14174	4409.52	7359.39	9310.29
Q9Y5H4	PCDHGA1	Protocadherin gamma-A1	N				1222.61	2204.46	2778.76	359.382	882.688	1271.78
Q9Y5H6	PCDHA8	Protocadherin alpha-8	N				1221.13	1884.51	1775.12	727.581	1198.73	2135.79
Q9Y5I3	PCDHA1	Protocadherin alpha-1	N		195.006		353.011	471.014	1086.03			684.021
Q9Y5I4	PCDHAC2	Protocadherin alpha-C2	N		457.281	108.095	13887.7	18176.3	21639.9	6968.67	13634.7	18866.6
Q9Y5R2	MMP24	Matrix metalloproteinase-24	N				2790.1	2779.1	4403.13	1369.04	2570.08	2978.11
Q9Y5S2	CDC42BPB	Serine/threonine-protein kinase MRCK beta	N	1979.68	1535.45	1367.82	2999.65	4353.5	4763.37	2624.04	4993.82	3820.07
Q9Y5V3	MAGED1	Melanoma-associated antigen D1	N				426.972	822.84	917.255	495.751	812.339	533.235
Q9Y5X1	SNX9	Sorting nexin-9	N	836.964			726.038	1272.57	1422.12	611.443	679.456	957.067
Q9Y5X3	SNX5	Sorting nexin-5	N				1022.63	1442.33	2367.84	766.585	971.925	863.135
Q9Y5Y0	FLVCR1	Feline leukemia virus subgroup C receptor-related protein 1	N	298.506	576.076	641.86	3671.79	6348.72	11478.6	1992.93	3251.19	5518.45
Q9Y624	F11R	Junctional adhesion molecule A	N				1378.17	4691.11	3824.42	679.267	1461.73	1871.32
Q9Y625	GPC6	Glypican-6	Y	1095.81	949.669	319.61	70824	204092	176920	45794.7	89626.1	107314
Q9Y639	NPTN	Neuroplastin	N	365.611	403.081	498.062	7883.68	20450.2	16584.8	3328.37	5479.51	6442.8
Q9Y696	CLIC4	Chloride intracellular channel protein 4	N	2079.64	1522.48	1397.89	3046.98	4525.33	4479.53	2050.07	3957.56	2734.26
Q9Y6D0	SELENOK	Selenoprotein K	N				1074.04	1310.05	4840.16		1024.04
Q9Y6I3	EPN1	Epsin-1	N	935.123			815.191	1730.18	1878.64	577.533	1019.81	606.755
Q9Y6M5	SLC30A1	Zinc transporter 1	N	897.779	690.215	1339.76	3537.5	9341.15	6941.59	2823.1	3453.32	3306.74
Q9Y6M7	SLC4A7	Sodium bicarbonate cotransporter 3	N	484.763			1007.84	1751.6	1504.97	884.07	860.905	889.063
Q9Y6N7	ROBO1	Roundabout homolog 1	N	912.406	2611.31	1084.62	19065.1	59772.2	47061.9	10379.1	19142.3	22586.2
Q9Y6W5	WASF2	Wiskott-Aldrich syndrome protein family member 2	N	225.953	239.951	397.915	1252.92	1902.93	3789.19	1177.41	2204.53	1428.75
