# Supplementary material for: Endogenous cell membrane interactome mapping for GLP-1 receptor via ligand-based proximity labeling
Source: Research Square preprint supplement (doi:10.21203/rs.3.rs-3449159/v1), 2023-10-27
Supplement: Supplementary file 2 [file 4c51fc198cadddc378c5ea34.xlsx]

## Sheet: Sheet1
Supplementary Table 3: Identification and quantification of cell membrane proteins in the time-resolved experiment
Protein.Group	Genes	First.Protein.Description	5 min-1 intensity	5 min-2 intensity	15 min-1 intensity	15 min-2 intensity	30 min-1 intensity	30 min-2 intensity	60 min-1 intensity	60 min-2 intensity
A0A096MJ31;A0A0G2K5G6	Magt1	Magnesium transporter protein 1	33303.7	25975.3	37314.7	40873.6	41118.8	38360.8	45296	46054
A0A096MJ54	Itprip	Inositol 1,4,5-trisphosphate receptor-interacting protein	3557.49	3071.18	3760.23	4618.04	4575.98	5809.79	3987.65	4236.97
A0A096MJE7;F1LNC9;Q499Q0	Slc19a2	Thiamine transporter 1	1386.26	1991.12	1798.3	541.188	1078.46	1426.21	1011.16	730.761
A0A096MJF7;A0A096MJV9;A0A8I6A560;A0A8I6GHN6;A0A8I6GK35;F1LLZ7	Phka1	Phosphorylase b kinase regulatory subunit	3427	4333.13	3475.78	5308.67	7799.85	3839.95	5725.84	6036.87
A0A096MJY1	Gpc6	Glypican 6	47349.5	49807.9	33607.8	35644.7	37874.9	47126.1	48833	43647.4
A0A0A0MY13	Gpr158	Probable G-protein-coupled receptor 158	2995.26	2940.93	2404.31	1853.78	1490.11	3471.68	3646.95	2246.54
A0A0G2JSI4;A0A8I5ZM38;A0A8I6G2Z6	Adgre5	Adhesion G protein-coupled receptor E5	11628.5	11356.4	5709.39	7221.99	7050.62	8761.26	5872.96	5394.77
A0A0G2JSK5;A0A8I6GKJ1	Itgb1	Integrin beta	122354	125080	118643	108447	99627.3	118868	78667.1	93238.4
A0A0G2JSM8	Cdc42	Cell division control protein 42 homolog	1946.7	1714.61	2412.09	3141.03	3046.31	3738.85	2587.06	2726.41
A0A0G2JTH4	Cd47	Leukocyte surface antigen CD47	26178.1	28322.4	13002.2	17708.3	13875.8	18163.6	20283.3	16003.6
A0A0G2JTL4;Q63116	Kit	Mast/stem cell growth factor receptor	102363	112575	79040.2	75841.8	66436	80319.6	84608	73916.7
A0A0G2JV00;D3ZKI8	Pgap6	Post-GPI attachment to proteins 6	3236.01	2378.56	2876.69	1679.72	381.661	2158.98	7060.28
A0A0G2JVR0;A0A8J8YBN3	Ptpra	Receptor-type tyrosine-protein phosphatase alpha	31068.2	21131.7	29018	29541.2	22887	21705.8	25753.4	18888.9
A0A0G2JXB5;A0A8I6GJA0;F1M3G8	Ano2	Anoctamin							566.419	107.683
A0A0G2JXG3;A0A8I6A2B0	Tmem30a	Cell cycle control protein	838.559	1247.87	389.863	578.234				417.502
A0A0G2JXJ7	Esyt1	Extended synaptotagmin-1	98725.7	84056	121718	116118	89558.9	120685	129166	127207
A0A0G2JYF7;D4A6H8	Ctnna2	Catenin alpha-2	12553	11891.4	12579.7	11475.6	10817.4	13839.4	11370	10504
A0A0G2JZ95	Hmgb3	High mobility group protein B1	1359720	1180260	1604990	2266800	2166350	1429420	1592910	2364510
A0A0G2JZR0;A0A8I6B5T2	Spire1	Spire-type actin nucleation factor 1	13717.8	13445.3	16297.1	17238.7	18843.7	16524.9	20094.5	17220.2
A0A0G2K095;A0A8I5ZR70;A0A8I6AIS5;E9PT65;Q5PQK5	Rdx	Radixin	13073.9	12681.8	16413.3	11723.8	13330.6	15989.7	13719.7	12383.2
A0A0G2K0I6;F1M7E5	Cdh5	Cadherin-5		2761.46	2257.89	1569.46	1518.57	2166.92	1874.88	2321.47
A0A0G2K0P8	Slc44a1	Choline transporter-like protein	1190.97	7754.63	5927.95	6904.64	4191.1	5126.86	6275.14	6666.31
A0A0G2K1J9;A0A8I5Y7V9;Q68FZ1	Slc2a2	Solute carrier family 2, facilitated glucose transporter member 2	88819.8	110031	41545.8	42078.7	23321.5	39323.2	40887.6	36783.9
A0A0G2K1M7;A0A8I5Y1S2;A0A8I5ZRU7;A0A8I6AA94;A0A8I6ASC3;A0A8I6G530	Ano6	Anoctamin	34612.1	39146.2	34073.5	34733.9	30494.4	36204	33168.2	29151.1
A0A0G2K1V7	Sgcb	Beta-sarcoglycan	3583.65	2958.56	6145.94	5709.06	6407.36	6445.41	7485.61	7163.56
A0A0G2K2P5	Tjp1	Tight junction protein ZO-1	33126.7	33247.1	31054.6	24309.3	23539.7	26661.1	21289.3	20691.4
A0A0G2K3C7	Fam126a	Family with sequence similarity 126, member A	27316.4	32055.1	30275.8	23864.3	29264.4	32647.4	29562.4	34680.3
A0A0G2K4B0;D4A3F5	Gprc5b	G protein-coupled receptor, class C, group 5, member B	20523.9	16457.2	17273.8	16658.3	18356.8	20553.1	21365.4	22699.3
A0A0G2K5B0;D4A3Z3	Tbc1d24	TBC1 domain family member 24	10595.1	8954.54	8797.48	10863.6	9934.64	9657.26	9818.81	10518.4
A0A0G2K5N6;A0A8I6AEW1;F1LQT3	Rock2	Rho-associated protein kinase	4545.55	7461.77	6501.72	6694.6	4805	5206.19	4438.78	4301.59
A0A0G2K663	Marveld2	MARVEL domain-containing 2	49659.7	55037.7	37361.9	33924.6	34216.7	41644	43409.2	34423
A0A0G2K728	Cdh4	Cadherin-4	210988	218347	124012	88402.8	108160	121815	118422	90248.1
A0A0G2K9C8;A0A8I5Y5Q0;A0A8J8YFM3	Phkb	Phosphorylase b kinase regulatory subunit	12205.5	11800.5	11970.5	11663.9	11492.6	11281.4	10361.2	11136.6
A0A0G2KA90;A0A8I6GE75	Dsc1	Desmocollin 1	3977.39	14435.2	8656.23	9063.96	4648.81	3085.3	2577.68	5355.1
A0A0G2KAK9;B1WC12	Mfsd5	Molybdate-anion transporter	19452.5	14968.1	23545.7	23690.7	20063.5	22623.2	26340.3	21637.9
A0A8I5Y0H3;A0A8I5YBX7;A0A8I6A923;A0A8L2UKX0;F1LR52	Abcc4	ATP-binding cassette subfamily C member 4	10817.1	27218.1	9605.58	7987.11	1535.38	3693.39	2154.36	1904.82
A0A8I5Y4Y3;A0A8I6ABL2;F1LV44	Tenm3	Teneurin transmembrane protein 3	118227	131595	88611.2	79454.9	72235.9	92548.3	75504.4	65473.4
A0A8I5Y5V9	Madd	MAP kinase-activating death domain protein	7850.03	5705.07	8724.88	8604.53	10635.1	6080.32	7142.38	9540.19
A0A8I5Y929;G3V7J1	Clstn3	Calsyntenin-3		3761.48
A0A8I5ZKS4	Fam126a	Family with sequence similarity 126, member A	6316.18	5144.03	3738.56	3529.33	3370.25	4862.91	3556.27	2480.98
A0A8I5ZKY9;A0A8I5ZPU7;A0A8I6GA69;C0KUC5;C0KUC6	Lims1	LIM and senescent cell antigen-like-containing domain protein	73473.3	68779.5	79922.6	62686.6	81030.4	79149.1	82399.1	87723.4
A0A8I5ZKZ0;A0A8I6A2Q1;A0A8I6B5C4	Znrf3	RING-type E3 ubiquitin transferase	1158.17	884.304	428.912	509.284	1131.52	967.938	1092.01	1019.58
A0A8I5ZLG9;A0A8I5ZWF0;A0A8I6A710	AABR07037995.1	Phosphorylase b kinase regulatory subunit	4921.08	5878.03	3678.72	5510.5	4909.82	5748.25	4261.94	4806
A0A8I5ZRZ0;A0A8I6AF48	Vangl1	Vang-like protein	7817.6	10467.5	10020.1	8239.61	10363.3	9272.76	11351.9	11838.4
A0A8I5ZS66;G3V9Y2	Plpp1	Phospholipid phosphatase 1	9980.88	10113.8	13382.7	14360.4	14793.7	16614.7	20086.1	16997.1
A0A8I5ZT89;A0A8I6A5B0;Q4V7D4	Fam126b	Family with sequence similarity 126, member B	5893.7	6225.18	6511.26	5734.71	6648.44	6514.64	6943.18	6616.48
A0A8I5ZUI2;A0A8I6A4Y6;D3ZF54	Ano10	Anoctamin	29941	30841.5	34121.3	36750.2	31318.4	36879.8	46992.1	43834.2
A0A8I5ZWG8;A0A8I6AIP3	Eef1a2	Elongation factor 1-alpha 2	4195.56	4248.57	4134.05	5974.83	6424.63	6500.87	7842.43	7668.15
A0A8I5ZXH4	Slc8a1	Sodium/calcium exchanger 1	34929.7	40217.3	31495.9	36053.6	47967.5	48593.9	53474.8	29073.4
A0A8I5ZZZ3;Q6DUV1	Prkce	Protein kinase C		2141.13	3289.49	4848.54	3234	2849.95	3901.32	4011.47
A0A8I6A177;A0A8I6A180;A0A8I6AKL5	Tenm4	Teneurin transmembrane protein 4	58947.1	55199.5	38390.7	36912.6	29170.2	34278	28590.2	30560.3
A0A8I6A411;A0A8I6AKI5;F1LNE2	Unc5b	Netrin receptor UNC5	5906.67	1998.57	1693.45	788.835	1618.25	845.343	1334	820.234
A0A8I6A660	Esyt2	Extended synaptotagmin 2	63964.9	66042.7	78294.4	83488.7	74886.4	78517.5	90753.3	85660.7
A0A8I6AF64	Gng4	Guanine nucleotide-binding protein subunit gamma	6719.38	14326.6	8918.3	7237.42	7406.31	8340.7	7651.04	6521.72
A0A8I6AGD6	Elapor2	Endosome-lysosome-associated apoptosis and autophagy regulator family member 2	55620.4	48228.1	55910.1	56979.3	59925	58742.6	71004.7	62748
A0A8I6AGW9;D3Z981	Plxna1	Plexin A1	74049.7	79870.6	54858.2	50388.7	49267.7	53696.8	48462.8	39381.5
A0A8I6G961;A0A8L2QQY0	Slc44a2	Choline transporter-like protein	1118.85	885.549	1352.1	1204.31	1540.27	1312.65	2265.66	1475.47
A0A8I6GAY3;G3V6P8	Gng12	Guanine nucleotide-binding protein subunit gamma	3001.72	4027.67		2531.01
A0A8I6GHR1;G3V875	Gabrq	Gamma-aminobutyric acid type A receptor subunit theta	2737.56	2291.96	2227.87	2627.26	1709.1	2199.98	2458.54	2286.45
A0A8J8YIL8;F1LM54	Fgfr1	Fibroblast growth factor receptor	7109.24	9107.89	4539.86	5998.86	5223.93	4298.59	3357.94	2743.94
A0A8L2QZI9	Marveld2	Occludin	529288	568666	259070	178532	232145	264307	306882	232221
A0A8L2UHD3	Alcam	CD166 antigen	12284.2	16445.1	5323.25	5062.35	6145.26	7472.82	6810.82	4316.61
A0A8L2ULZ0	Clcn3	Chloride channel protein	529.644	172.795	882.531	376.65	529.374	404.8	393.815	842.711
A1A5P9	Magee1	Melanoma-associated antigen E1	6629.39	5786.58	5908.37	7053.61	8794.35	6466.49	7923.53	9295.74
B0BNK7	Lrfn3	Leucine-rich repeat and fibronectin type-III domain-containing protein 3	30292.1	28730.3	10072.4	9385.89	8177.21	9996.84	7114.88	7054.15
B0BNL6	Arrdc1	Arrestin domain-containing protein 1	9212.17	9601.42	9649.9	9827.38	10757.7	11030.6	10910	11468.2
B1H234	Flrt3	Leucine-rich repeat transmembrane protein FLRT3	6597.97	5840.82	3803.18	3029.66	3458.77	3599.99	3716.88	3171.77
B1H267	Snx5	Sorting nexin-5	37415.3	40801.7	27453.7	25601.1	23194.6	25004.1	23814	25935.5
B1WC10	Wdpcp	WD repeat-containing and planar cell polarity effector protein fritz homolog					795.711	699.348	644.352	546.089
B1WC97	Kctd7	BTB/POZ domain-containing protein KCTD7	2168.66	2946.97	2690.62	2194.06	3560.3	2676.3	3688.35	2608.06
B2GV54	Nceh1	Neutral cholesterol ester hydrolase 1	240376	222282	270598	287251	271732	262352	284213	262853
B2GV87	Ptpre	Receptor-type tyrosine-protein phosphatase epsilon	16598.5	18325.4	12110.8	12175.4	10942.8	18078.3	16334.8	15672.1
B2RZ37	Reep5	Receptor expression-enhancing protein 5	56606	51086.4	48351.6	44641.9	36372.7	38668	30832.6	27239.5
B4F779	Appl2	DCC-interacting protein 13-beta	22563.8	24690	24812.2	24257.3	26433.2	26889.7	27643.1	23713.6
B4F795	Slc44a2	Choline transporter-like protein 2	7171.83	7602.61	10314.2	9884.9	11429.4	10386.6	11565.6	12213.2
B4F7C5	Lrrtm4	Leucine-rich repeat transmembrane neuronal protein 4	23699.6	24075.2	14621.1	13654.9	15337.1	18038.1	15579.5	12200.3
B4F7E7	Pals1	Protein PALS1	5950.71	6112.59	7185.71	6793.27	8521.52	8325.92	8787.11	8038.16
B4F7E8	Niban2	Protein Niban 2	15966.8	17748.8	22603.7	18291.3	20827	20309	20700.1	19876.7
B5D5N9	Slc7a2	Cationic amino acid transporter 2	1688970	1528150	1363790	1300930	1298720	1443300	1385250	1135680
B5DEL3	Ttc17	Tetratricopeptide repeat protein 17	25255.4	20100.5	25398.7	23891.9	21460.3	23248.2	22098.7	19845.7
B5DEN9	Vps28	Vacuolar protein sorting-associated protein 28 homolog	28744.5	36427.8	33656.1	33597	38407.6	37183.7	40420.9	41287.6
B5DFN2	Ahcyl1	S-adenosylhomocysteine hydrolase-like protein 1	301527	301876	364909	359493	345512	348545	332919	357898
B5MEV3	Slc52a2	Solute carrier family 52, riboflavin transporter, member 2	11959	14366.7	12134.8	11029.8	13110.1	16053.9	11474.9	10305.3
C0HL12	Adgrb1	Adhesion G protein-coupled receptor B1	13074.6	12861.8	10440.9	7669.54	9201.42	11137.5	9835.89	8154.72
D3Z8L7	Rras	Ras-related protein R-Ras	14811.2	12654.6	13860	15745.8	17129.5	13377.9	21241.7	19942.2
D3ZB51	Igsf9b	Protein turtle homolog B	21503.6	23428.7	11469.9	7230.11	5919.46	9896.63	7429.59	5714.57
D3ZBW5	LOC685203	Small membrane A-kinase anchor protein	595.245	422.097	1287.82	618.407	289.7		776.584	739.809
D3ZC04	Esyt3	Extended synaptotagmin 3	2845.68	1570.66	2497.8	2868.87	3807.11	4021.18	4212.55	4409.61
D3ZDX5	Plxnb1	Plexin B1	14555.9	14856.1	14060.3	12174.7	11608	14218.3	12105	10984.4
D3ZE85	Frrs1l	DOMON domain-containing protein FRRS1L	32792.7	29242.4	27098.8	32631.6	33627.2	32460	36649.2	27550
D3ZEH5	Sidt2	SID1 transmembrane family member 2	19657.2	17445.3	24691.2	19850.3	24564.9	26382.5	24608.4	22810.9
D3ZEN0	Micall2	MICAL-like protein 2	2966.41		4465.83			2155.16
D3ZES7	Plxna4	Plexin A4	5637.15	3596.03	2654.37	1989.73	2000.19	2849.15	2146.5	3074.27
D3ZEY4	Dgkq	Diacylglycerol kinase theta	3961.13	5380.51	4055.81	3812.35	4565.65	4208.85	3704.31	3793.17
D3ZHV2	Macf1	Microtubule-actin cross-linking factor 1	40673.4	42854.7	45486.4	39958.7	41174.4	41545.5	37376.8	38414
D3ZJP6	Myo10	Unconventional myosin-X	61229.3	72247.1	68755.3	49236.7	56712.1	59376.6	54180.6	45481.6
D3ZJR7	Dsc2	Desmocollin 2	71340.6	87716.1	59819.6	55050.8	49157.3	58960.8	62292.7	49897.5
D3ZM39	Dsg1	Desmoglein 1	8392.21	11682.4	10217.9	8535.76	6758.04	6976.44	6668.92	7873.2
D3ZNF5	Tmem63c	Calcium permeable stress-gated cation channel 1	1881.25	4794.83	2984.6	2688.93	3325.21	3222.15	3193.17	3180.77
D3ZPX4	Plxna3	Plexin-A3	64671.2	58597.4	52850.1	48758.2	46841.1	53271.3	46445.5	41851.9
D3ZQ55	Jph1	Junctophilin	6334.18	6489.98	7352.66	7289.66	7507.37	7690.71	6529.92	5754.52
D3ZSI8	Pip5k1a	Phosphatidylinositol 4-phosphate 5-kinase type-1 alpha	20696.1	20530.9	24791.8	22451.4	24460.1	23299.2	26703.5	26684.9
D3ZTI3	Cdh24	Cadherin 24		34737.7	18400.9	13996.3	9794.23	11464.4	10807.8	6921
D3ZTJ0	Rp2	Protein XRP2	34286	30305.2	35140.2	27642.6	29807.6	35854.9	33815.4	29166.4
D3ZTV3	Flrt2	Leucine-rich repeat transmembrane protein FLRT2	154697	142213	67078.2	71398.5	63277.6	89420.5	67752.5	76478.1
D3ZUI5	Cobl	Protein cordon-bleu	6070.78	5020.27	6850.95	5136.03	5099.56	5746.59	7255.83	6590.13
D3ZVR9	Pgm5	Phosphoglucomutase-like protein 5	1648.46	1357.61	995.367	1829.97	1896.59	1810.12	1709.91	2151.04
D3ZWP6	Plxna2	Plexin A2	16751.5	16042.3	12318.1	11731.1	12449.5	13304	10231.2	10316.1
D3ZWZ9	Gpr107	Protein GPR107	5104.17	4942.94	4353.01	4888.83	6878.73	6366.96	5739.45	5766.48
D3ZZX1	Inpp5a	Inositol polyphosphate-5-phosphatase A	14736.1	13315.8	14891.8	12637.5	12729.8	13209.6	12007.5	11739.7
D4A1R8	Cpne1	Copine-1	146171	155359	174539	177187	170257	164991	184263	194988
D4A208	Srgap2	SLIT-ROBO Rho GTPase-activating protein 2	13825.2	13709.4	14002.3	10347.5	12751.4	12992.3	11468.9	10304.7
D4A2F2	Pard6b	Par-6 family cell polarity regulator beta	11344.3	11710.6	8078.96	8068.01	8958.17	10855.5	10176.6	11118.7
D4A2W1;F1LTZ5	Enpp4	Bis(5'-adenosyl)-triphosphatase	34565.9	28047.4	19396.8	22743.7	21082.1	22921.2	22032.7	22249.7
D4A5F1	Pkd2	Polycystin 2, transient receptor potential cation channel	22102.8	22796.5	29018.1	26055	25623.9	29434.1	28394.1	25267
D4A6D8	Lrrtm1	Leucine-rich repeat transmembrane neuronal protein 1	13281.6	14681.2	9099.97	7751.82	10800.3	9961.22	10227.3	9625.09
D4A6L0	Gpr158	Probable G-protein coupled receptor 158	46549.8	48751.4	33058.3	28307.3	27302.5	32315.7	30627.9	29964.5
D4A740	Il17ra	Interleukin 17 receptor A	9461.82	10885.1	9648.89	8452.71	7816.86	9231.68	8507.34	8668.26
D4A758	Lrrc8b	Leucine-rich repeat-containing 8 VRAC subunit B	14099.8	15526.8	14648.5	12836.2	12311.6	14060	14861.7	12986.2
D4A7P2	Lrrtm2	Leucine-rich repeat transmembrane neuronal protein 2	5169.37	6439.27	3931.55	4484.07	3609.6	2656.07	2783.19	1812.27
D4AA47	Atp8b1	Phospholipid-transporting ATPase IC	28945.8	28851.7	30194.7	27550.3	27987	29464.5	29858.6	25373
D4ACN8	Plgrkt	Plasminogen receptor (KT)	41180.3	29530.9	28435.9	29634.5	34357.6	31890.7	34453.8	32461.2
D4ACT8	Pcdhga3	Protocadherin gamma a3					1560.22	25971.3		22875.3
E9PTA2	Trpm2	Transient receptor potential cation channel subfamily M member 2	3250.91	4200.57	3883.82	3510.44	3578.19	3566.2	3819.35	3431.92
E9PTG8	Stk10	Serine/threonine-protein kinase 10	2018.25	2757.26	2184.42	2359.1	2567.18	2615.84	2611.44	2876.33
E9PTT0	Zdhhc17	Palmitoyltransferase ZDHHC17	94915	89504.5	113483	105673	90717.2	104003	85357.6	93162.5
E9PTX9	Slc12a2	Solute carrier family 12 member 2	115272	113128	132251	111097	110436	123818	105662	96919.3
F1LN06;F1LNW0;F1LRU8;F1LSG7	Fgfr2	Fibroblast growth factor receptor	4593.53						1803.28	1712.55
F1LQP8	Cdh6	Cadherin-6	60933.3	99106.9	35542.3	31806.4	34241.2	47846.2	36221.8	17859
F1LR10	Lima1	LIM domain and actin-binding protein 1	23054.7	26932.6	20873.9	19955.4	17542.7	18777.3	17858.5	20061.8
F1LR98	Cdh10	Cadherin 10	9387.28	9582.09	4364.86	3209.43	3295.16	5248.22	4336.55	4036.13
F1LYQ8	Farp1	FERM, ARHGEF and pleckstrin domain-containing protein 1	50919.2	51198	60264.1	49980.1	58609.5	57967.7	51057.2	49958.4
F1LYX9	Dsg2	Desmoglein 2	118915	134437	71701	66265.4	64245.5	76904.9	77213.9	52620.8
F1LZ38	Tenm4	Teneurin transmembrane protein 4		152.735	130.696	82.4278	157.553	131.439		165.97
F1M067	Slc26a11	Solute carrier family 26 member 11	8264.14	7539.03	8353.84	7991.51	8452.82	11686.3	10588.5	10472.8
F1M1A2	Cdh12	Cadherin 12	19680.6	21288.1	12184.2	9150.63	11379.2	13653.3	6275.13	6909.32
F1M386	Rapgef2	Rap guanine nucleotide exchange factor 2	6810.21	6922.43	6540.91	4713.46	4865.21	4872.23	5114.14	5046.22
F1M391	Sting1	Stimulator of interferon genes protein	16343	13777.3	20455.6	13841.8	16130	22324.6	19528.5	15980.3
F1M3J4	Abcc4	ATP-binding cassette subfamily C member 4	89060.8	83858.9	87536.6	87631.4	86373.8	91485.8	92764.4	94950.9
F1M775	Diaph1	Protein diaphanous homolog 1	20001.2	18471.6	17032.8	12896.3	12803.3	14617	13449.7	12724.3
F1M8K0	Dag1	Dystroglycan 1	16551.9	18504.5	14709.4	12881.1	16279.6	18482.7	17861.7	13994.1
F1MA84	Cacna1c	Voltage-dependent L-type calcium channel subunit alpha	11674.2	12003.2	13767.8	10818.4	13984.9	15748.1	13761	10830.4
F1MAB2	Elapor1	Endosome-lysosome associated apoptosis and autophagy regulator 1	137723	116898	126472	139855	145643	131419	147657	127596
F1MAB7	Dgki	Diacylglycerol kinase iota	15328.3	19984.7	20167.8	20013.2	19036.7	21689	22479.7	22256.2
F1MAD2	Patj	InaD-like protein	6995.49	7018.93	8483.8	6903.59	6771.18	8012.44	7185.48	7029.33
F1MAH6	Cdh11	Cadherin 11	12371.8	14858.4	10879.7	8837.63	9426.76	11946.9	9832.27	8098.64
F8WG75	Snap25	Synaptosomal-associated protein	1362.95	989.92	1622.43	1484.27	2705.85	3315.2	3178.89	2972.94
G3V6L1	Fzd6	Frizzled-6	9258.86	6814.07	5785.55	5793.3	5620.07	5922.27	5971.89	4823.95
G3V7L1	Utrn	Utrophin	47779.1	49442.2	58685	49852.9	51636.5	54474.2	49798.2	48129.1
G3V8K2	Gng3	Guanine nucleotide-binding protein subunit gamma	15732.8	20306.9	16109.7	15239.1	17007.2	15546.5	15865.4	16886.1
G3V8P3	Celsr2	Cadherin EGF LAG seven-pass G-type receptor 2	14560.5	19023.2	12132.8	10187.7	9308.91	13956.8	10992.2	8029.15
G3V914	Gria2	Glutamate receptor		701.198		567.977	708.358
G3V928	Lrp1	Prolow-density lipoprotein receptor-related protein 1	63119.5	62489.5	44634.6	44037.6	36265.2	41678.9	38113.1	32410.3
G3V9H8	Ret	Proto-oncogene tyrosine-protein kinase receptor Ret	4389.02	5406.6	3158.84	3828.52	3403.95	3538.13	2791.73	3364.97
G3V9J2	Cdh7	Cadherin 7, type 2	5470.88	7489.72	3076.59	2837.95	1833.01	2933.39	2090.14	1565.07
H1UBN0	Cpne7	Copine-7	115954	138467	146920	166042	161352	128844	190700	176789
I6LBX7	Pcdhgb8	Protocadherin gamma b8	20433.6	27562.5	15804.4	16983.9	12849.9	17063.2	16035.6	14680.8
M0R5H4	Pcdhb10	Protocadherin beta 10	26125.1	21754.5	24870.6	20210.8	16847.8	20700.5	18527.2	15040.4
M0RC99	Rab5a	Ras-related protein Rab-5A	102784	118567	114898	118959	122570	145637	164257	159075
O08560	Dgkz	Diacylglycerol kinase zeta	7563.28	6110.49	8154.96	7890.28	8414.42	8423.3	8763.38	8698.52
O08564	Plpp1	Phospholipid phosphatase 1	5052.14	5746.31	7333.3	5563.28	9840.67	8457.57	12210.3	12810.1
O08565	Cxcr4	C-X-C chemokine receptor type 4	3540.57	6841.82	2776.81	3113.24	3073.4	4335.57	4569.72	3227.18
O08662	Pi4ka	Phosphatidylinositol 4-kinase alpha	114697	116000	127968	101598	94821.2	104138	91074.5	86102.9
O08678	Mark1	Serine/threonine-protein kinase MARK1	11544.4	12227.5	14887.7	13161.7	13069.7	14226.1	14058.3	14953.1
O08679	Mark2	Serine/threonine-protein kinase MARK2	92011.5	98055.5	101531	101492	97335.2	104316	95168.9	94443.9
O08721	Unc5a	Netrin receptor UNC5A	3925.56	4807.49	3965.76	3757.67	3012.45	2261.3	3407.58	2642.01
O08722	Unc5b	Netrin receptor UNC5B	12307.5	12732.9	7697.38	5917.22	7172.59	7046.59	8132.47	7968.93
O08839	Bin1	Myc box-dependent-interacting protein 1	19790.9	19717.2	15461.9	12354.1	13269.7	16383.4	12780.5	13147
O08873	Madd	MAP kinase-activating death domain protein	86630.9	90062.6	103710	97250.8	96971.7	96728	95181.8	93520.9
O08962	Kcnh2	Potassium voltage-gated channel subfamily H member 2	10907.3	11071	12419	11112.7	13729.5	14987	13068.8	12944.8
O35049	Smpd3	Sphingomyelin phosphodiesterase 3	75571.8	76351.1	81135.8	81488.9	68226.4	77080.9	67033.4	77612.7
O35112	Alcam	CD166 antigen	751675	717458	333321	289032	248494	316796	326830	225691
O35158	Cdon	Cell adhesion molecule-related/down-regulated by oncogenes	5761.8	5702.05	3322.48	3922.5	3875.34	4498.73	3830.26	2746.97
O35274	Ppp1r9b	Neurabin-2	25341.5	30227.9	35923.3	30471.4	31464.2	34149.2	33749.9	31398.9
O35346	Ptk2	Focal adhesion kinase 1	19371.6	20215.7	19692.3	21264.9	18316.7	18891.6	16338.1	15743.1
O35394	Rabac1	Prenylated Rab acceptor protein 1	11202.2	11404.1	1921.41	2302.44	4971.42	3189.08	4080.36
O35413	Sorbs2	Sorbin and SH3 domain-containing protein 2	23507.7	20954.6	21303.5	18451.6	17250.6	18704.4	14684.2	16110.5
O35433	Trpv1	Transient receptor potential cation channel subfamily V member 1	1573.41	678.6	792.939	1440.3	1324.24	2081.45	1350.06	1273.09
O35509	Rab11b	Ras-related protein Rab-11B	149695	141957	169607	158889	198792	204321	283300	253080
O35547	Acsl4	Long-chain-fatty-acid--CoA ligase 4	120318	114466	142027	142450	139898	140867	136211	129957
O35763	Msn	Moesin		52309.8	7336.94		6083.3	8684.08	3501.9	16075.4
O35777	Magt1	Magnesium transporter protein 1	52747.9	61175.3	56265.3	50585.1	53776.1	58065.1	67755.7	68798.1
O35796	C1qbp	Complement component 1 Q subcomponent-binding protein, mitochondrial	9536.46	8870.97	8991.96	15081.2	18201.8	15051.3	12748.5	14650.2
O35799	Hfe	Hereditary hemochromatosis protein homolog	14299	12878.3	12981	16837.8	19001.2	16816	21676.6	20208.3
O54698	Slc29a1	Equilibrative nucleoside transporter 1	16945.3	18363.2	11773.3	8844.73	7183.88	9530.44	9314.65	6967.98
O54701	Slc24a2	Sodium/potassium/calcium exchanger 2	14313	17494	16928.2	15450	13752.4	17177.9	18786.6	15706
O54800	Cdh8	Cadherin-8			607.215		648.281
O54861	Sort1	Sortilin	20936.2	19794.4	17704.2	19449.1	19342	22277.4	24047.2	19319.9
O54898	Cacna1g	Voltage-dependent T-type calcium channel subunit alpha-1G	2835.37	3396.43	3143.39	2947.22	2190.58	3139.22	2039.24	2444.3
O54902	Slc11a2	Natural resistance-associated macrophage protein 2	12113.5	13558.6	24789.5	21084.3	30258.6	26951.3	33176.4	29381.5
O54922	Exoc7	Exocyst complex component 7	47993.4	45952.7	50753.9	49981.9	44902.8	48309.1	47232.1	46407.9
O55005	Robo1	Roundabout homolog 1	63363.3	61759.2	40335.6	35597.5	30631.5	35896.1	37383.7	38159.2
O55012	Picalm	Phosphatidylinositol-binding clathrin assembly protein	33883.2	26516.7	17261.2	13192	14765.2	17871.9	14803.1	14741.1
O55159	Epcam	Epithelial cell adhesion molecule	141840	129941	83188.6	84148.5	93683.8	101087	123904	101465
O55164	Mpdz	Multiple PDZ domain protein	3560.31	5405.16	4636.93	3823.21	4430.04	4782	3937.9	5072.25
O55173	Pdpk1	3-phosphoinositide-dependent protein kinase 1	25183.6	25470.5	29707.1	29308.8	29845.3	29735.1	32752.4	31144.8
O70141	Sema6b	Semaphorin-6B	5374.93	8647.36	2014.18	3264.11	1537.82	3679.5	377.194	1917.14
O70239	Axin1	Axin-1	2173.29	1611.24	2347.26	2125.7	3278.93	2522.51	2251.82	3473.52
O70247	Slc5a6	Sodium-dependent multivitamin transporter	14629.2	12696.6	9815.31	9272.82	9590.95	10473.8	9633.33	7891.29
O70352	Cd82	CD82 antigen	47043.6	48628.4	63475.2	58889.9	63946.4	69655.9	72219.8	56427.2
O70377	Snap23	Synaptosomal-associated protein 23	20749.7	17016.4	27026.4	27174.6	29287.1	29679.1	36693.2	34995.5
O70511	Ank3	Ankyrin-3	28723.4	31850.7	29237	25647.8	23288.9	27512.3	24109.2	23452.3
O70531	Slc26a2	Sulfate transporter	56506.6	60169.8	61113.5	48647.1	59097.8	62650.6	55509.3	48598.3
O70595	Abcb6	ATP-binding cassette sub-family B member 6	138267	121649	189657	199710	215245	195538	229736	219290
O70610	Gjd2	Gap junction delta-2 protein	12976.5	15731.6	16252.9	16573.3	13728.4	16748.2	16333.7	12963.3
O88278	Celsr3	Cadherin EGF LAG seven-pass G-type receptor 3	8125.6	8829.96	8214.74	9699.43	7431.59	8309.6	7381.22	6774.64
O88339	Epn1	Epsin-1	8202.72	8132.28	7416.43	6798.56	6689.38	5916.88	6947.08	6434.44
O88377	Pip4k2b	Phosphatidylinositol 5-phosphate 4-kinase type-2 beta	14211.9	14357.5	14565.5	15357	15346.2	15724	16413.6	15650.5
O88397	Slco1a5	Solute carrier organic anion transporter family member 1A5	1521.93	1522.86	453.065	841.214	1105.77	706.944	532.623	859.797
O88563	Abcc3	ATP-binding cassette sub-family C member 3	51249.3	49581.5	50904.1	47808.5	48203.9	49861.8	48398.1	44459.4
O88767	Park7	Parkinson disease protein 7 homolog	20035	18789.9	17925.2	17883.3	16924.4	18372.5	18120.3	16146.5
O88775	Emb	Embigin	112455	106147	116472	110201	125445	120684	132875	110048
O88788	Alg10b	Putative Dol-P-Glc:Glc(2)Man(9)GlcNAc(2)-PP-Dol alpha-1,2-glucosyltransferase	354110	231636	498438	410563	535026	434917	508346	473433
O88813	Acsl5	Long-chain-fatty-acid--CoA ligase 5	44387	45081.5	57968.2	58650.9	57805	56116.4	66759.6	63206
O88871	Gabbr2	Gamma-aminobutyric acid type B receptor subunit 2	34201.6	38620.1	24813.2	26709.3	26386.7	29241.5	29835.3	22870.2
O88917	Adgrl1	Adhesion G protein-coupled receptor L1	12839.5	11471.5	8898.81	9702.94	8774.48	9106.79	9419.6	7545.19
P00507	Got2	Aspartate aminotransferase, mitochondrial	73078	76126.5	79099.8	76864.1	69546.5	78150.9	77780.2	75702.6
P00787	Ctsb	Cathepsin B	5575.89	6139.44	4563.35	5731.79	5167.8	3113.95	4438.25	5877.09
P04218	Cd200	OX-2 membrane glycoprotein	388957	433634	199819	203608	207051	227920	247727	206909
P04764	Eno1	Alpha-enolase	165069	193678	182397	241769	185175	192261	200247	191958
P04785	P4hb	Protein disulfide-isomerase	417883	397945	539558	518960	494649	535921	556836	515366
P04897	Gnai2	Guanine nucleotide-binding protein G(i) subunit alpha-2	309057	353050	358081	334024	328369	335913	367526	362621
P05696	Prkca	Protein kinase C alpha type	81771.2	72758.4	89044.8	95621	83167.4	80935.9	94895.8	88520.4
P05714	Rab4a	Ras-related protein Rab-4A	34205.7	36591.7	34549.1	37806.4	30758.1	33945	36594.1	37828
P06494	Erbb2	Receptor tyrosine-protein kinase erbB-2	1725.88	1861.02		1855.98	2877.7	3004.54		2139.47
P06685	Atp1a1	Sodium/potassium-transporting ATPase subunit alpha-1	1470890	1411110	1585600	1499930	1387560	1550850	1527960	1428570
P06686	Atp1a2	Sodium/potassium-transporting ATPase subunit alpha-2	2452.07	2672.01	3647.07	3221.94	2204.15	3207.31	3029.34	3078.51
P06687	Atp1a3	Sodium/potassium-transporting ATPase subunit alpha-3	206353	168564	229935	216627	219761	233748	250524	219310
P07154	Ctsl	Procathepsin L	6731.42	6676.22	6270.81	8135.23	7738.8	7719.29	8176.75	8120.2
P07174	Ngfr	Tumor necrosis factor receptor superfamily member 16	233524	216126	117499	77854.7	134652	165017	147485	136209
P07314	Ggt1	Glutathione hydrolase 1 proenzyme	5503.12	6778.66	2101.54		2210.18		2257.7	1471.9
P07323	Eno2	Gamma-enolase	13659.2	13556.7	12487.6	17558.2	12634	15612.4	11800.8	10950.4
P07340	Atp1b1	Sodium/potassium-transporting ATPase subunit beta-1	1753230	1752590	1114070	1079070	1176380	1316940	1380640	1066350
P07936	Gap43	Neuromodulin	460.608	315.624			461.736		276.054	308.587
P08104	Scn3a	Sodium channel protein type 3 subunit alpha	5810.57	6629.2	7121.3	5670.2	6432.37	6543.84	5945.81	5513.46
P08289	Alpl	Alkaline phosphatase, tissue-nonspecific isozyme	5572.62	5753.46	2780.47	4705.99	3064.26	3831.86	3413.87	3703.41
P08592	App	Amyloid-beta precursor protein	89091	87344.5	88685.8	102156	116707	99091.7	98971.9	108711
P08644	Kras	GTPase KRas	20821.6	21557.4	27054.5	23172.6	25121.6	26237.8	28300.8	24385.2
P08753	Gnai3	Guanine nucleotide-binding protein G(i) subunit alpha-3	55882.5	52679.3	64892.6	49971	43463	48607.9	55908.6	56528.3
P08909	Htr2c	5-hydroxytryptamine receptor 2C	2690.77		2563.16		1748.08	2042.63
P09215	Prkcd	Protein kinase C delta type	49289.7	49220.3	50469.7	53514.2	51042.9	56709.8	54090.2	56316
P09216	Prkce	Protein kinase C epsilon type	8541.74	8601.88	8871.09	8374.27	8248.82	8929.26	8362.95	7614.95
P09456	Prkar1a	cAMP-dependent protein kinase type I-alpha regulatory subunit	94374.5	96519.1	113549	109615	114568	126369	134798	131448
P09606	Glul	Glutamine synthetase	77801.7	80243.1	98439.9	94014.6	108584	102635	89163.2	97406.8
P09626	Atp4a	Potassium-transporting ATPase alpha chain 1	104185	93056.9	101274	100908
P09760	Fer	Tyrosine-protein kinase Fer	16422.6	14192.7	18843	16547.6	15300.6	16539.2	16174	16217.9
P0C0A9	Svip	Small VCP/p97-interacting protein	5607.79	6320.63	4792.07	4612.07	3617.3	4550.27	3723.2	3444.87
P0C152	Tmem67	Meckelin	32549.7	27576.7	18809.8	18095	16772	20544.4	18208.2	14397.9
P0C1Q3	Lpcat2	Lysophosphatidylcholine acyltransferase 2	7506.81	5652.21	5621.68	6593.36	7321.84	8188.98	7640.23	8229.43
P0C1S9	Daglb	Diacylglycerol lipase-beta	16864.6	13968.7	20442.5	21792.8	20402.9	21808	21837.1	20120.8
P0C1X8	Aak1	AP2-associated protein kinase 1	33610.1	39839.1	37063.8	30821.7	29717.1	31709	29241.8	27332.8
P0C219	Slmap	Sarcolemmal membrane-associated protein	42699.6	38590.8	51850	56516.4	55687	57786.9	63985.1	61375.9
P0C548	Pnpla2	Patatin-like phospholipase domain-containing protein 2	3293.53	1783.28	3155.4	3568.24	3836.66	3463.24	1372.75	3330.5
P0C588	Cnnm4	Metal transporter CNNM4	26173.4	24068.3	26456.8	25983.1	28263.1	29810	29858.7	28043
P0C5H6	Igsf9	Protein turtle homolog A	2940.53	3097.55	1431.3	1411.2	1553.05	2053.97	1829.52	1210.86
P0C643	Rasgrp2	RAS guanyl-releasing protein 2	2534.07	2850.6	1956.5	1279.87	4048.68	2989.03	2117.75	2857.6
P0C644	Ppip5k1	Inositol hexakisphosphate and diphosphoinositol-pentakisphosphate kinase 1	34019.8	33506.5	36925	39319.6	38857.7	38591.8	34072.5	35119.3
P0C6P5	Arhgef28	Rho guanine nucleotide exchange factor 28		2849.38	2317.14	2563.97	3514.26	2071.9	2253.95	2592.02
P0C6T3	Prr7	Proline-rich protein 7	2669.41	1734.62	838.117	1505.4	3532.66	1364.5	1532.78	3061.43
P0C8E4	Map3k7	Mitogen-activated protein kinase kinase kinase 7	9985.19	10186.1	10976	11939.8	11958.8	12391.3	11721.6	11410.2
P0CC10	Lrrc4b	Leucine-rich repeat-containing protein 4B	160478	156317	100373	93100.1	95141.3	112578	98624	79364.6
P0CE46	Slc30a8	Zinc transporter 8	124886	109114	170850	148391	177677	186618	238521	183570
P0CH38	Fbxo45	F-box/SPRY domain-containing protein 1 (Fragment)	10496.2	8738.5	8132.79	10292.5	10838.7	10891.6	12239.9	12332.2
P0DSP1	Sorl1	Sortilin-related receptor	18002.4	19563.4	18772.7	17549.8	17362.5	17870.7	16268.7	13320.3
P10824	Gnai1	Guanine nucleotide-binding protein G(i) subunit alpha-1	40790.5	46339.5	54427.3	48900.8	35104.9	36511.6	36037.5	29018.1
P11167	Slc2a1	Solute carrier family 2, facilitated glucose transporter member 1	3811.45	4468.32	3482.29	3454.48	3629.87	3169.72	4028.7	3593.54
P11345	Raf1	RAF proto-oncogene serine/threonine-protein kinase	58126.6	61688.6	69626.4	82156.4	69404.1	68012.8	66562.2	64888.4
P11505	Atp2b1	Plasma membrane calcium-transporting ATPase 1	250636	265921	258120	249176	190954	238155	218257	200864
P11506	Atp2b2	Plasma membrane calcium-transporting ATPase 2	91941.1	78537.3	105045	96947.9	103527	108877	106767	92035.6
P11530	Dmd	Dystrophin	7706.98	10935.9	10914.3	9495.15	10913.3	9219.79	8867.66	9898.25
P12336	Slc2a2	Solute carrier family 2, facilitated glucose transporter member 2	654335	669313	336276	319846	321789	432448	385963	306591
P12368	Prkar2a	cAMP-dependent protein kinase type II-alpha regulatory subunit	18144	18196	21393.5	19702	22056.8	22909.4	26141.7	25443.4
P12369	Prkar2b	cAMP-dependent protein kinase type II-beta regulatory subunit	23711.8	24378.7	29935.3	29129	30539.9	30784.7	35736.7	33509.5
P12390	Chrnb2	Neuronal acetylcholine receptor subunit beta-2	3414.72	2336.22	1653.43	1990.46	2670.76	2774.52	2108.74	2236.07
P13265	Gpc3	Glypican-3	5223.9	4827.85	5230.4	4227.23	3296.06	4687.38	3792.61	4726.24
P13596	Ncam1	Neural cell adhesion molecule 1	840069	874641	433640	402223	362520	436805	473186	345185
P13852	Prnp	Major prion protein	92769.3	113897	55943.7	59386.7	56073.4	65394.3	66541.1	55141.6
P14056	Araf	Serine/threonine-protein kinase A-Raf	113055	112018	115248	128470	124371	127919	124801	115165
P14270	Pde4d	cAMP-specific 3',5'-cyclic phosphodiesterase 4D	4003.38	4358.34	3998.7	3609.65	4509.96	3929.77	3814.35	4215.82
P14562	Lamp1	Lysosome-associated membrane glycoprotein 1	172301	179063	254099	256325	266497	319571	415116	346868
P14659	Hspa2	Heat shock-related 70 kDa protein 2	298316	278923	322518	341798	288308	311103	345798	326330
P15127	Insr	Insulin receptor	30210.6	31705.8	20683	20025.6	17789.4	20645.9	19079	15957.8
P15304	Lipe	Hormone-sensitive lipase	3540.25	3727.52	3904.9	4537.3	4491.52	3938.86	3775.27	3700.07
P15384	Kcna3	Potassium voltage-gated channel subfamily A member 3	7511.08	7701.6	7704.53	7296.23	3996.91	8520.89	6443.34	5996.93
P15385	Kcna4	Potassium voltage-gated channel subfamily A member 4	5123.74	2645.72	4717.74	4146.02	2954.48	5376.86	6129.24	6289.88
P15387	Kcnb1	Potassium voltage-gated channel subfamily B member 1	4016.21	4415.47	4035.6	4085.1	4228.29	5392.57	4505.18	4220.38
P15791	Camk2d	Calcium/calmodulin-dependent protein kinase type II subunit delta	27723.5	28729	29835.2	27827.5	25940.8	28240.4	27870.1	29240.9
P15999	Atp5f1a	ATP synthase subunit alpha, mitochondrial	1277310	930519	990160	1470670	1096870	1000900	787267	882225
P16310	Ghr	Growth hormone receptor	10516.7	14330	4024.12	4767.17	5632.63	7928.33	7069.77	6729.14
P16573	Ceacam1	Carcinoembryonic antigen-related cell adhesion molecule 1	49814	60877.4	34643.5	35200.2	29983.1	35838	39498.4	30114.5
P17046	Lamp2	Lysosome-associated membrane glycoprotein 2	113171	117080	104698	117081	130829	125743	146789	154892
P18266	Gsk3b	Glycogen synthase kinase-3 beta	34386.6	34925	40687.7	37021.2	45846.4	45271.5	47986.8	45650.3
P18484	Ap2a2	AP-2 complex subunit alpha-2	41923	40603.9	37015.1	30409.6	28829.2	34116	25417.1	26315.7
P19332	Mapt	Microtubule-associated protein tau	13650.1	17767.8	14918.7	11791.6	11404.8	14216.4	10270.3	10053.6
P19491	Gria2	Glutamate receptor 2	5264.09	5408.99	8559.29	7368.81	6319.75	7081.58	6687.2	6668.48
P20171	Hras	GTPase HRas	33217.4	40700.4	47074.6	40011.4	25146.3	32481.8	43187.8	42738.2
P20417	Ptpn1	Tyrosine-protein phosphatase non-receptor type 1	124001	126161	151892	160890	173511	159550	181915	175742
P20695	Ifrd1	Interferon-related developmental regulator 1	2227.49	3070.61	2841.45	4374.81	3550.51	1959.57	3119.53	4388.69
P20786	Pdgfra	Platelet-derived growth factor receptor alpha	4533.35	4691.34	3448.58	3455.49	3164.76	3055.23	3270.13	3409.31
P21588	Nt5e	5'-nucleotidase	33562.6	28506.6	18089	20147.3	24170.1	22489.8	27806.1	19826.9
P21932	Adcy3	Adenylate cyclase type 3			374.935			782.435	792.558
P22002	Cacna1c	Voltage-dependent L-type calcium channel subunit alpha-1C	29135.7	33470.9	31410.2	31283.9	31750.3	32460	31403.4	28098.2
P22273	Il6r	Interleukin-6 receptor subunit alpha	2702.94	3261.48	1851.66	1908.51	1965.28	2140.95	2510.69	2796.16
P22734	Comt	Catechol O-methyltransferase	121990	122300	175347	170836	157210	164060	201578	200516
P22909	Adra2a	Alpha-2A adrenergic receptor	19544.6	15952.8	15320.7	13990.9	18140.3	15584.8	17570.4	12614
P23377	Furin	Furin	5103.79	6269.58	6357.54	7011.73	5854.77	6159.9	5522.43	5601.99
P23385	Grm1	Metabotropic glutamate receptor 1	4151.03	3289.28	6234.47	5156.63	7913.91			5963.78
P23514	Copb1	Coatomer subunit beta	308347	273108	365913	325279	336503	361324	330777	321255
P23897	Gucy2c	Guanylyl cyclase C	24714.6	24770.3	25255.2	24679.9	24335.4	27797.1	24306.4	22512.9
P24062	Igf1r	Insulin-like growth factor 1 receptor	138179	163173	103349	92330	104935	114431	107245	92349.1
P24942	Slc1a3	Excitatory amino acid transporter 1	3443.07	3085.96			4457.47	4191.81		5098.33
P25304	Agrn	Agrin	20424	16238.4	25763.4	32409.1	30429.9	30924.8	35410.2	35034.9
P26342	Tgfbr3	Transforming growth factor beta receptor type 3	4497.06	5340.87	3869.19	3366.18	4553.4	3804.83	3461.57	3640.06
P26431	Slc9a1	Sodium/hydrogen exchanger 1	80309.2	86256.6	58133.4	54532.3	68685.5	67732.5	69937.9	60018.9
P26453	Bsg	Basigin	20395	15344.6	11276.3	12337.3	14311.9	15633.3	15384.7	12905.1
P26794	Pim1	Serine/threonine-protein kinase pim-1	33231.3	31771.5	39182.1	37976.6	36340.6	37315.5	38651.8	33925.3
P26817	Grk2	Beta-adrenergic receptor kinase 1	75051.5	78810.3	92684.2	101484	91783.9	87412	94483.5	99136.6
P27274	Cd59	CD59 glycoprotein	1477.87	11976.1		5806.59		9117.79		5754.02
P27791	Prkaca	cAMP-dependent protein kinase catalytic subunit alpha	7960.2	8457.13	4651.56	3221.95		744.61	1395.7
P28471	Gabra4	Gamma-aminobutyric acid receptor subunit alpha-4	3738.85	2320.96	1241.55	2290.89	2648.14	1317.42	2501.99
P28570	Slc6a8	Sodium- and chloride-dependent creatine transporter 1	17543.8	16964.7	13231.8	13012.3	13825.9	14503.9	14668	12938.8
P28572	Slc6a9	Sodium- and chloride-dependent glycine transporter 1	76587.9	71239.9	59004.3	54856.6	59235.9	66302.9	65520.8	56156.9
P28648	Cd63	CD63 antigen	37966.4	31546.3	41106	41834.8	42822	43153.6	44880.1	43159.3
P29066	Arrb1	Beta-arrestin-1	2313.93	2195.38	2234.65	3072.87	2836.81	2798.19	3418.35	3292.92
P29067	Arrb2	Beta-arrestin-2	6896.44	6537.08	8686.05	8238.62	8769.53	9099.57	9150.91	8903.41
P29321	Epha8	Ephrin type-A receptor 8 (Fragment)	1831.24	2468.79	1969.38	1286.11	2027.07	2714.81	1797.79	1757.75
P30680	Sstr2	Somatostatin receptor type 2	21331.9	22749.7	14794.6	11639.6	17733.7	15031.1	13922.1	10255
P30823	Slc7a1	High affinity cationic amino acid transporter 1	185706	177369	164622	180908	165648	192371	211509	186796
P31000	Vim	Vimentin	5583.34	6922.19	3450.24	2433.1	1264.62	1834.65	1853.18
P31016	Dlg4	Disks large homolog 4	5564.7	5292.63	5300.67	5593.72	4127.21	5164.91	4702.02	4267.2
P31596	Slc1a2	Excitatory amino acid transporter 2	42289.6	60906	72580.3	38601.3	56212.4	51044	47974	35507.2
P31643	Slc6a6	Sodium- and chloride-dependent taurine transporter	51602.2	53220.3	56256.5	43899.4	54473.1	57342.3	51489.6	51211.6
P31977	Ezr	Ezrin	18514.6	20420.3	23365.8	18984.9	24171.3	25841	25893.1	22958.9
P32215	Adcyap1r1	Pituitary adenylate cyclase-activating polypeptide type I receptor	1931.69	2005.81	1374.15	1286.81	717.27	2730.02	971.372	797.09
P32301	Glp1r	Glucagon-like peptide 1 receptor	6639.35	7138.29	6593.75	6558.61	5805.42	6335.91	6102.74	5628.81
P32577	Csk	Tyrosine-protein kinase CSK	35461.1	43046.4	41101.4	44517.4	41781.1	44978.5	44881.4	46751
P32736	Opcml	Opioid-binding protein/cell adhesion molecule	883.695	1597.63	804.301	510.415	1583.06	1013.1	1456.04	1203.19
P32851	Stx1a	Syntaxin-1A	63613	54871.6	93740	83764.5	106315	105951	125901	116223
P34058	Hsp90ab1	Heat shock protein HSP 90-beta	303985	299421	335401	333183	336847	323676	308637	302049
P34980	Ptger3	Prostaglandin E2 receptor EP3 subtype	9553.83	12706.3	5842.07	3612.42	3421.1	4430.11	2499.08	2446.69
P35233	Ptpn2	Tyrosine-protein phosphatase non-receptor type 2	98442.3	89849.7	107275	120942	112272	104808	120746	126856
P35280	Rab8a	Ras-related protein Rab-8A	30719	36508.3	35013	35140.7	27783.3	31273.1	34653.7	35558.9
P35286	Rab13	Ras-related protein Rab-13	12798.2	14962.3	14086	14526.2	12185.4	14100.8	11598.1	13639.3
P35289	Rab15	Ras-related protein Rab-15	38528.4			64089.6
P35353	Crhr1	Corticotropin-releasing factor receptor 1	100324	110935	29591.2	37846.8	44846.9	56152.3	48106.2	20024.2
P35400	Grm7	Metabotropic glutamate receptor 7	10327	9661.22		10821.3	9129.55	11703.8	4433.99	8988.79
P35465	Pak1	Serine/threonine-protein kinase PAK 1	5178.98	4221.59	3161.07	2561.7	2872.61	3186.97	2586.78	2674.69
P35525	Clcn2	Chloride channel protein 2	4845.55	3835.02	5753.13	3583.66	4366.74	4670.12	4819.56	3970.95
P35559	Ide	Insulin-degrading enzyme	45998.7	51411.2	56444.2	48356.7	47136.2	52336.4	42634.3	40238.7
P35739	Ntrk1	High affinity nerve growth factor receptor	3007.72	2268.67	1971.66	1784.03	3271.88	3065.62	2360.9	1532.03
P35952	Ldlr	Low-density lipoprotein receptor	34540.4	36652.6	25436.7	28444.2	25618	29062.9	29192.5	29100.2
P36860	Ralb	Ras-related protein Ral-B	53137.3	41020	66491.6	61732.9	65476.3	72840.3	96582	100898
P38444	Acvr2a	Activin receptor type-2A	4917.97	6443.82	3544.72	3583.65	3791.79	4212.86	3430.08	3536.82
P38983	Rpsa	40S ribosomal protein SA	160003	200958	204616	245134	197576	185753	321469	330000
P39052	Dnm2	Dynamin-2	47345	47996.4	52408.3	48121.4	48579.5	43808.6	50636.9	49989.8
P40146	Adcy8	Adenylate cyclase type 8	1968.34	1929.44	2064.73	1849.09	1149.98	1378.94	1414	1112.23
P40190	Il6st	Interleukin-6 receptor subunit beta	50435.8	52062.9	33586.8	36222.3	29002.4	30153.9	32211.8	27536.6
P40748	Syt3	Synaptotagmin-3	2213.85	4068.62	2842.51	3414.67	3782.83	3127.74	3663.23	2897.77
P42264	Grik3	Glutamate receptor ionotropic, kainate 3	7813.93	8624.62	7461.01	6519.95	4932.6	7424.65	6979.04	6284.41
P42893	Ece1	Endothelin-converting enzyme 1	132235	131198	87330	89509.4	88942.8	90990.1	110221	84501
P43219	Gipr	Gastric inhibitory polypeptide receptor	88848.2	72376.4	50647.1	46783.6	40299.4	51080	47502.7	36145.1
P43245	Abcb1	ATP-dependent translocase ABCB1	2639.99	3002.41	3652.54	2490.61	3322.22	3213.97	2428.39	3116.4
P43322	Nrg1	Pro-neuregulin-1, membrane-bound isoform	979.055
P43427	Slc2a5	Solute carrier family 2, facilitated glucose transporter member 5	2740.48	5380.14	4658.83	4910.43	5267.19	5803.79	4941.22	4467.58
P46101	Dpp6	Dipeptidyl aminopeptidase-like protein 6	51437.7	55075	34280.2	36913.6	37324.5	39486	41685.6	31487.6
P46933	Apbb1	Amyloid beta precursor protein binding family B member 1	13015.5	17650.3	18709.6	20536.9	22971.7	23619.2	21258.7	19692.2
P47196	Akt1	RAC-alpha serine/threonine-protein kinase	17571.5	17899.3	22800.2	21623.9	23410.5	24229.7	25669.9	24067.9
P47197	Akt2	RAC-beta serine/threonine-protein kinase	9176.31	7668.52	9052.8	9595.22	10395.9	11476.7	10367.2	11303.4
P47709	Rph3a	Rabphilin-3A	1993.05	1844.18	1646.05	1119.31	1092.47		481.491
P47820	Ace	Angiotensin-converting enzyme	3792.27	3820.65			2018.48	3318.08	2202.54	1943.4
P48442	Casr	Extracellular calcium-sensing receptor	71343.6	70623.7	53812.4	46110.1	50281.8	61445.4	58035.6	52650
P48768	Slc8a2	Sodium/calcium exchanger 2	12518.4	12377.9	8994.73	9229.61	11466.5	10953.8	11762.3	9743.41
P49134	Itgb1	Integrin beta-1	447299	445812	363076	338627	348589	359499	387105	321230
P49651	P2ry1	P2Y purinoceptor 1	16480.9	15979.9	17572.5	18888.5	13311.3	13759.9	15995.7	10775.4
P49803	Rgs7	Regulator of G-protein signaling 7	11877.4	14536.8	13919.4	14215.3	13538.2	13456.2	12139.5	14300.1
P50545	Hck	Tyrosine-protein kinase HCK	1982.97	3016.32	5119.77	3003.46	2203.78	4855.7	4999.73	4464.82
P51146	Rab4b	Ras-related protein Rab-4B	23500	19640.3	18162.8	24038.3	26887.5	23503.7	30416.3	28346.9
P51158	Rab28	Ras-related protein Rab-28	10704.8	8687.85	10372	14507.5	12321.3	12272.8	13256.6	13722
P51577	P2rx4	P2X purinoceptor 4	64746.7	47605.8	73539.4	79123.4	78412.5	76658.9	88366.3	86177.1
P51635	Akr1a1	Aldo-keto reductase family 1 member A1	52140.4	56700.8	51763.9	61289.4	48953.9	48628.4	41157.5	49571.1
P51792	Clcn3	H(+)/Cl(-) exchange transporter 3	55710.6	58718.5	66199.4	72411.4	52445.1	61991.1	61349.9	55710.6
P51796	Clcn5	H(+)/Cl(-) exchange transporter 5	23018.8	23337.9	23947.4	29481.4	26519.8	29907.8	30814.5	27381.4
P51907	Slc1a1	Excitatory amino acid transporter 3	4335.87	4384.45	2575.37	4311.62	4051.68	6119.99	4431.36	5709.73
P52188;P52190	Kcnj12;Kcnj4	ATP-sensitive inward rectifier potassium channel 12	6326.16	5019.14	2953.62	4542.75	8257.64	7184.54	7390.5	5746.26
P52796	Efnb1	Ephrin-B1	69882.6	84383.9	43427.2	37799.8	29438.4	34742.8	42500.2	31553.2
P52925	Hmgb2	High mobility group protein B2	161413	109229	192460	282852	343081	209404	200665	247298
P53042	Ppp5c	Serine/threonine-protein phosphatase 5	8444.94	11269.7	11811.9	11085.5	10375.7	11340.4	10647.4	10751.5
P53987	Slc16a1	Monocarboxylate transporter 1	57583.9	56395.8	54392.8	58906.1	56185.4	75575.5	75686.8	52937
P54282	Cacna1a	Voltage-dependent P/Q-type calcium channel subunit alpha-1A	8562.59	8998.79	6738.9	6712.64	6018.45	6903.59	8101.89	6167.65
P54283	Cacnb1	Voltage-dependent L-type calcium channel subunit beta-1	922.03	806.646		1157.31		733.911	1054.11	708.04
P54313	Gnb2	Guanine nucleotide-binding protein G(I)/G(S)/G(T) subunit beta-2	282473	369958	407503	335694	291767	301832	352762	321237
P54757	Epha5	Ephrin type-A receptor 5	3415.81	5503.86	2012.31	2767.77	1970.41	4020.93	2430.52	1921.33
P54759	Epha7	Ephrin type-A receptor 7	7986.74	8235.4	4948.07	4277.48	3210.92	4811.03	5443.54	4027.77
P54921	Napa	Alpha-soluble NSF attachment protein	43149.5	44837.8	41058.1	42653.9	34934.6	39522.3	41901.1	42822
P55043	Rrad	GTP-binding protein RAD	2297.89	1086.34	1904.58	1342.89	1325.61	1413.3	818.57	956.995
P55161	Nckap1	Nck-associated protein 1	57858.4	61671.3	62795.2	53694.9	58917.6	60725.6	54113.6	51733.8
P55280	Cdh6	Cadherin-6	87426.4	126859	53820.6	43689.3	49654.4	65524.8	59139.6	30378.4
P55314	C8b	Complement component C8 beta chain						2881.42
P55926	Asic1	Acid-sensing ion channel 1	3802.48	5387.5	4590.81	3061.97	4450.25	5779.49	4524.23	3605.83
P56558	Ogt	UDP-N-acetylglucosamine--peptide N-acetylglucosaminyltransferase 110 kDa subunit	89442.9	98297.2	99979.9	95811.4	91140.4	92191.6	82166.7	89221.7
P56819	Bace1	Beta-secretase 1	9177.67	8576.37	8658.01	9179.34	7632.15	9249.45	7047.93	8118.87
P59215	Gnao1	Guanine nucleotide-binding protein G(o) subunit alpha	966610	948566	1184500	1063680	1008210	1072770	1108050	1096710
P59241	Aurka	Aurora kinase A	5115.62	5319.84	7514.1	7982.87	8245.6	8231.48	7758.39	8278.74
P59798	Selenok	Selenoprotein K	25925.9	28449.5	42283.9	36466.5	36627	42511.5	49646.9	40016.9
P60123	Ruvbl1	RuvB-like 1	263866	248093	332631	350151	353994	380772	415524	406388
P60881	Snap25	Synaptosomal-associated protein 25	33159.9	32266.9	42835.5	36946.2	45738.6	44686.1	61886.6	53047.3
P60905	Dnajc5	DnaJ homolog subfamily C member 5	72693.5	43121.1	71077.5	78828.9	140156	146978	160608	147548
P61023	Chp1	Calcineurin B homologous protein 1	2965.54	2733.07	3526.24	4215.72	5590.22	5577.61	8231.67	5909.45
P61078	Ube2d3	Ubiquitin-conjugating enzyme E2 D3	78187.6	71468.2	76367	78742	71843.7	69399.1	78971.7	71070.5
P61589	Rhoa	Transforming protein RhoA	23900.1	28250.3	29814.3	26015.9	30601.3	35555	44458.5	47790.4
P62332	Arf6	ADP-ribosylation factor 6	91962.9	92050.2	104508	99363.8	123174	122100	126299	136522
P62483	Kcnab2	Voltage-gated potassium channel subunit beta-2	30934.3	32749.1	37403.4	39060.6	38088.9	38669.8	43197	40604.7
P62630	Eef1a1	Elongation factor 1-alpha 1	2184540	2279740	2315220	2343970	1924400	1789920	1999930	2235570
P62744	Ap2s1	AP-2 complex subunit sigma	40385.5	36408.4	36199.9	28699	35821.6	36081.3	28321.7	33754.6
P62747	Rhob	Rho-related GTP-binding protein RhoB	36490.3	42280.6	44867.4	40635.8	47843.9	50709.2	60487.4	50459.2
P62815	Atp6v1b2	V-type proton ATPase subunit B, brain isoform	187543	181484	262542	278984	255282	274473	369048	323548
P62824	Rab3c	Ras-related protein Rab-3C	470360	391994	607095	549107	503505	534475	568832	575556
P62836	Rap1a	Ras-related protein Rap-1A	21895.8	33470	20128.1	18191	14245	33152.1	43529.1	32590.5
P62944	Ap2b1	AP-2 complex subunit beta	85036.2	89973.9	97956.5	82536.8	84147.3	92529.7	91676.2	87959.1
P62957	Cacng7	Voltage-dependent calcium channel gamma-7 subunit	6367.3	4489.59	6043.04	6646.88	8070.79	6638.23	6272	7278.05
P63012	Rab3a	Ras-related protein Rab-3A	348119	308671	341197	400836	247824	254746	316316	279350
P63018	Hspa8	Heat shock cognate 71 kDa protein	733931	699343	710996	692455	552329	630234	602902	582032
P63025	Vamp3	Vesicle-associated membrane protein 3	7890.39	8920.13	11365.9	12090.4	9397.16	9507.83	13546.8	9330.12
P63035	Cyth2	Cytohesin-2	5835.01	6269.23	6512.12	8232.25	6885.29	6712.8	7508.89	8686.31
P63045	Vamp2	Vesicle-associated membrane protein 2	5993.96	7516.64	1340.08	1281.13	554.683	2286.12	698.017
P63079	Gabrb3	Gamma-aminobutyric acid receptor subunit beta-3	9942.45	10634.2	9277.36	7873.61	6218.74	7395.81	9642.38	9359.55
P63095	Gnas	Guanine nucleotide-binding protein G(s) subunit alpha isoforms short	185665	177385	238674	210354	168844	149645	178229	86622.8
P63144	Kcnab1	Voltage-gated potassium channel subunit beta-1			540.289	932.553	413.62		955.975	1109.08
P63245	Rack1	Receptor of activated protein C kinase 1	276907	250556	303792	388770	344850	307604	425362	451633
P63322	Rala	Ras-related protein Ral-A	147754	137455	146646	129145	137091	141783	171233	170093
P63329	Ppp3ca	Protein phosphatase 3 catalytic subunit alpha	41680.3	47391.5	46997.9	35297.8	40899.3	41758.1	35882.9	33279
P67779	Phb1	Prohibitin 1	297897	284887	369648	429764	446230	441957	563842	583024
P68182	Prkacb	cAMP-dependent protein kinase catalytic subunit beta	30945.3	33025.3	37651.4	42725.7	45483.3	35737.5	46744.5	49798
P69682	Necap1	Adaptin ear-binding coat-associated protein 1	12003.7	8861.81	6083.12	3402.55	4149.92	4664.59	4497.96	4904.61
P70470	Lypla1	Acyl-protein thioesterase 1	30444.7	40902.3	23866.4	32201.2	26932.4	26973.6	35262.2	36759.2
P70478	Apc	Adenomatous polyposis coli protein	15482.6	16277.9	16186.4	14654	13957.5	14383.2	13370.6	12972.1
P70498	Pld2	Phospholipase D2	4038.04	6305.1	6392.82	5891.94	5197.88	5424.99	5299.72	5182.07
P70500	Cdipt	CDP-diacylglycerol--inositol 3-phosphatidyltransferase	105059	72971.9	78779.3	66826.4	63544	70093.6	45046	36112.3
P70549	Slc8a3	Sodium/calcium exchanger 3	1953.92	2380.43		938.065
P70550	Rab8b	Ras-related protein Rab-8B	3843.23	4926.58	5044.61	6372.09	5658.4	6303.93	8785.6	7718.86
P70585	Gpr19	Probable G-protein coupled receptor 19	8075.87	5225.21	6011.73	5326.17	6332.35	4921.42	5202.55	5486.27
P70600	Ptk2b	Protein-tyrosine kinase 2-beta	19780.3	19012.1	18136.9	17609.5	17067.3	17659.6	16562.4	16139.7
P70617	Ninj1	Ninjurin-1	5049.68	4666.94	8308.44	7355.6	12044.3	8981.35	11265.8	13430.9
P70705	Atp7a	Copper-transporting ATPase 1	16259.7	16674.2	17644.6	16126	14211.8	16036.6	14228.9	13386.2
P80202	Acvr1b	Activin receptor type-1B	9272.53	17197.6	8712.24	10288	12868.6	15648.9	10823.2	11058.3
P80204	Tgfbr1	TGF-beta receptor type-1	24727.8	31283.4	34726.5	30856.2	29855.7	34475.8	33234.5	31634.2
P81128	Arhgap35	Rho GTPase-activating protein 35	47687.5	52477.8	57308.4	50656.7	44282.2	50864.8	41959.8	40980.1
P81377	Prkar1b	cAMP-dependent protein kinase type I-beta regulatory subunit	58871	62830.2	66752	78550.9	71984.3	76314.6	83055.3	78005.1
P82471	Gnaq	Guanine nucleotide-binding protein G(q) subunit alpha	258249	299532	280699	272763	194729	223243	240935	229174
P82995	Hsp90aa1	Heat shock protein HSP 90-alpha	210453	200488	211264	194749	200876	193659	170035	170598
P84060	Dtnb	Dystrobrevin beta	14596.2	18431.1	15368	12031.5	10716.4	12636.8	12114.2	10997
P84092	Ap2m1	AP-2 complex subunit mu	131600	117881	137725	106896	117301	112905	110442	107566
P84889	Vangl2	Vang-like protein 2	10544.9	11563	13623	9456.32	14437.7	15015.5	18998.2	14330.4
P84903	Stim1	Stromal interaction molecule 1	60252.4	52521.1	85597	76327.9	90269.7	86796	102391	94105.4
P85972	Vcl	Vinculin	14973.8	16529.2	14616.1	10383.5	11257.5	12961.4	10355.9	9942.05
P97544	Plpp3	Phospholipid phosphatase 3	11000	10879.4	12725.8	10648.7	11260.6	14046.8	15449	14178.1
P97546	Nptn	Neuroplastin	46105.2	48018.5	25919.6	22721.8	31096.2	32839.2	31565.7	30151.7
P97570	Pla2g6	85/88 kDa calcium-independent phospholipase A2	34398.3	31890.7	39771.3	44738.5	47827.2	44563.8	45562.8	47254.4
P97603	Neo1	Neogenin (Fragment)	103794	110732	65138.3	63651.8	65902.8	71419.6	61359.2	50323.1
P97605	Efna5	Ephrin-A5	4666.84	4923.17		1638.35
P97629	Lnpep	Leucyl-cystinyl aminopeptidase	233225	218443	212662	216830	224409	224090	229291	201448
P97675	Enpp3	Ectonucleotide pyrophosphatase/phosphodiesterase family member 3	29933.9	32793	17607.2	18958.2	13269.1	15725.3	17648	15433.3
P97677	Dll1	Delta-like protein 1	15501.1	15656.2	9628.55	8777.21	9925.96	10480.6	11586.5	7802.16
P97685	Nfasc	Neurofascin	571815	618553	313349	301851	282127	350697	269040	206429
P97686	Nrcam	Neuronal cell adhesion molecule	252447	258783	136346	115601	112289	129317	127248	111841
P97694	Cyth1	Cytohesin-1	63327.9	63669.7	75581.9	74355.3	81762.7	82797.6	88452.1	82562.9
P97696	Cyth3	Cytohesin-3	5568.33	5612.7	5694.03	6811.76	5761.06	5426.41	7192.65	6314.79
P97829	Cd47	Leukocyte surface antigen CD47	4400.58	9266.44	4866.92	7630.99	2121.36	3947.06	5815.02	1906.24
P97836	Dlgap1	Disks large-associated protein 1	3089.15	3315.68	2952.41	2973.44	1782.26	3701.01	3358.53	2940.18
P97837	Dlgap2	Disks large-associated protein 2	7208.67	8963.16	12682.1	8463.54	13123.2	15031.8	15957.2	12170.1
P97838	Dlgap3	Disks large-associated protein 3	1671.2	3037.31	3499.01	2816.04	2949.69	3002.27	2241.7	2211.76
P97849	Slc27a1	Long-chain fatty acid transport protein 1	32295.4	34859.9	34516.5	37020.4	38720.6	36935.8	38046.9	36349.6
P97879	Grip1	Glutamate receptor-interacting protein 1	16366.5	20323	20374.4	17935.9	18616.9	19646.3	18935	16575.4
P97881	Muc13	Mucin-13	12075.4	11457.7	15194.2	14032.3	11893.3	9950.54	11797.9	11499.2
P97887	Psen1	Presenilin-1	25047.7	24053.6	34532.7	36312.4	39563.9	39792.3	51717.7	47069.2
P97943	Scarb1	Scavenger receptor class B member 1	92814.5	92065.6	62114.7	72927.7	91034.8	78721.9	85960.5	70463.1
P98105	Sele	E-selectin	3661.32		6455.81
Q01062	Pde2a	cGMP-dependent 3',5'-cyclic phosphodiesterase	6563.94	5804.56	6685.85	5508.58	7650.4	7898.17	5780.67	5536.58
Q01728	Slc8a1	Sodium/calcium exchanger 1	60257.9	75265.2	55885.3	57730.7	57893.6	61012.6	61081.7	55300.6
Q02294	Cacna1b	Voltage-dependent N-type calcium channel subunit alpha-1B	9963.47	11295.9	9349.9	8819.63	8119.99	9378.48	8771.86	8543.57
Q02955	Il1r1	Interleukin-1 receptor type 1	74449	72121.9	45516.2	45429.6	49141.1	54151	56238.1	37042.9
Q03114	Cdk5	Cyclin-dependent kinase 5	51846.9	55317	68703.7	82045	82960.9	78053.9	81735.4	77245.3
Q03343	Adcy6	Adenylate cyclase type 6	36550.3	36277.8	38014.4	34143.9	39021.5	39703.2	37585.8	35062.4
Q03348	Ptpra	Receptor-type tyrosine-protein phosphatase alpha	55799.8	57367.9	60857.4	53741.1	62774.9	68473.7	58365.2	58317.2
Q03555	Gphn	Gephyrin	21618.8	18529.8	18791.2	18153.4	18068	21545.9	20164.2	20426.9
Q04400	Adcy5	Adenylate cyclase type 5	2207.76	2309.14	2831.63	1960.18	1484.9	2063.99	1570.97	1526.1
Q04589	Fgfr1	Fibroblast growth factor receptor 1	1684.44	7144.05	3068.82	3735.36	2281.44	2849	4850.31	4142.98
Q04970	Nras	GTPase NRas	121959	126872	117547	100966	95926.2	134601	130260	133084
Q05140	Snap91	Clathrin coat assembly protein AP180	5866.4	6137.92	4303.65	4086.31	3353.79	4817.09	2666.39	2920.77
Q05175	Basp1	Brain acid soluble protein 1	28999.4	22555.2	47655.4	22751.1	42433.7	47142.9	46736	30603.1
Q05695	L1cam	Neural cell adhesion molecule L1	24439.7	23248.2	12579.2	12882.5	11560.6	12529.1	10959	8036
Q05764	Add2	Beta-adducin	64488.4	77379.9	76804.3	68267.2	66752.3	80188.6	68783.2	65344.6
Q06000	Lpl	Lipoprotein lipase	49109.5	51547.3	64216.9	64586.3	74437.3	59080.8	79474.9	89200.9
Q06486	Csnk1d	Casein kinase I isoform delta	46698.6	52987.9	51684.6	58697.3	53001.4	53478.7	59108.7	56171
Q07008	Notch1	Neurogenic locus notch homolog protein 1	8092.43	8636.28	6668.14	5154.41	5720.2	6659.45	4129.3	3597.94
Q07009	Capn2	Calpain-2 catalytic subunit	53752.1	44117.6	56198.1	48429.3	56000	59563	53364	54629.3
Q07014	Lyn	Tyrosine-protein kinase Lyn	65104.2	68160.4	75264.8	76491.4	72522.3	80048	79364.9	69663.5
Q07310	Nrxn3	Neurexin-3		6175.07	7543.68	8815.4		7670.94		11205.4
Q08163	Cap1	Adenylyl cyclase-associated protein 1	84097.6	84318.2	76043.9	60367.7	60290.4	65646.3	69455.7	66988.3
Q08201	Abcb4	Phosphatidylcholine translocator ABCB4	28123.9	30139.7	29187	27854	26952.8	28424.9	27302.5	26477.3
Q08406	Cntfr	Ciliary neurotrophic factor receptor subunit alpha	70806	69118.9	40251.4	39308.5	36324.9	41477.3	36906.6	24427
Q08464	Fzd2	Frizzled-2	8832.19	11276.7	7977.13	5717.29	8512.8	7291.96	6600.37	4972.03
Q08850	Stx4	Syntaxin-4	30570.7	31871.4	40088.4	40971.2	42692.7	47570.1	49248.2	47775.8
Q09429	Abcc8	ATP-binding cassette sub-family C member 8	99186.1	100700	103332	97983.2	95690.6	101362	88302.8	87815.6
Q0KL00	Piezo1	Piezo-type mechanosensitive ion channel component 1	2485.34	1785.66	2471.62	2982.03	1866.91	2308.33	3080.19	2392.66
Q0PMD2	Antxr1	Anthrax toxin receptor 1	4962.41	5612.93	4013.94	3408.93	4231.89	3347.25	4645.37	3457.42
Q10743	Adam10	Disintegrin and metalloproteinase domain-containing protein 10	203696	239040	175740	175856	185242	192138	200982	176065
Q1HAQ0	Lpcat1	Lysophosphatidylcholine acyltransferase 1	57684.8	52256.6	95487.3	95776.5	116579	107559	128494	114646
Q1WIM2	Cadm2	Cell adhesion molecule 2	29906.7	29255.5	15351.6	12681.3	13125.9	15150.8	12358.5	9700.8
Q1WIM3	Cadm3	Cell adhesion molecule 3	42712.3	40985.2	29052.3	22596.2	23212	25539.9	30573.7	27610.3
Q2HWF0	Fnbp1l	Formin-binding protein 1-like	80726.2	61940.7	48365	50650.2	44797.7	52462	47630.3	51354.1
Q2LC84	Numb	Protein numb homolog	26466.1	25767	21432.6	22838.8	24131.5	23571.1	27255.8	21794.6
Q2TA63	Tmem147	Transmembrane protein 147	3487.89	3629.62	6098.05	4520.38	2633.6	3533.86	6241.7	5173.92
Q2THW7	Zdhhc5	Palmitoyltransferase ZDHHC5	42058.4	42701.8	35695.9	32115.3	32070.5	38718.5	29283.4	25577.2
Q3C2P8	Spred2	Sprouty-related, EVH1 domain-containing protein 2	9499.82	9841.8	9919.49	8604.21	9996.21	10363.8	9312.4	9783.97
Q3KR56	Gramd1a	Protein Aster-A	7901.18	7671.01	8591.05	9459.93	8479.73	9008.07	8828.95	7686.27
Q3KRC4	Gprc5c	G-protein coupled receptor family C group 5 member C	51270.9	50084.6	62859.9	59986.1	45838	54403.2	45501.3	40391
Q3SWT0	Pecam1	Platelet endothelial cell adhesion molecule		8642.75		8994.99	4585.09	5548.97	4550.14	5442.11
Q45R42	Lrrc4	Leucine-rich repeat-containing protein 4	14882.4	16467	9710.3	8410.08	9402.3	9947.68	11940	8086.51
Q498D6	Fgfr4	Fibroblast growth factor receptor 4	31903.9	36326.7	20750.2	21598.3	21267.7	24401.5	23497.3	22377.3
Q498T9	Lrrc8c	Volume-regulated anion channel subunit LRRC8C	8588.79	9177.58	9525.51	9124.86	8162.56	10265.8	8414.83	11406.4
Q499Q7	Cldn8	Claudin	2469.46	1494.61	3173.82	1842.08	4238.68	5179.52	4568.19	4543.68
Q499R4	Yrdc	Threonylcarbamoyl-AMP synthase	8110.53	8284.92	8455.35	9751.51	10537.4	9267.63	11632.8	8942.35
Q4FZT0	Stoml2	Stomatin-like protein 2, mitochondrial	132521	84601.1	85349.8	123162	116321	105058	80135.5	86904.5
Q4FZZ1	Pxk	PX domain-containing protein kinase-like protein		2336.95	1291.24		1765.87	1041.73	1229.73	1507.39
Q4G017	Nisch	Nischarin	45787.8	45619.7	44206.8	41431	39725.9	43034.8	37228.4	38496.8
Q4JM44	Sgms2	Phosphatidylcholine:ceramide cholinephosphotransferase 2	1937.48		1086.47	2949.66			4225.16	3659.95
Q4QQS1	Tmem184a	Transmembrane protein 184A	16332	24604.8	32328.7	31870.2	28070.3	33060.4	33057.6	37947.5
Q4QQS3	Oscp1	Protein OSCP1	12888.4	7741.7	5858.36	7580.45	7935.54	7434.6		9030.68
Q4TU93	Mrc2	C-type mannose receptor 2	23584.5	24573.2	13914.4	14706.6	13700.2	13603.4	13919.4	11588.8
Q4V887	Slc39a6	Zinc transporter ZIP6	63049.2	69955.7	67171.6	60476.4	58953.3	67665.6	70673.5	58209.7
Q4V888	Pip4p2	Type 2 phosphatidylinositol 4,5-bisphosphate 4-phosphatase	77772.5	68694.9	84349	91211.2	85761.5	93873.4	93095	90017.9
Q4V8B2	Dcun1d3	DCN1-like protein 3	5676.38	4455.74	5367.29	4058.6	4398.7	4372.51	4334.3	3668.42
Q4V8I7	Lrrc8a	Volume-regulated anion channel subunit LRRC8A	47843.6	49225.1	44828.8	42070.3	45858.6	47515.9	46705	41415.9
Q505J9	Atad1	Outer mitochondrial transmembrane helix translocase	103064	87145.2	128920	133755	162694	166537	175874	151340
Q53AQ4	Tmub1	Transmembrane and ubiquitin-like domain-containing protein 1	29768.8	20059.7	16827.9	16998.1	10522.9	14723.7	13850.9	18888.7
Q562C9	Adi1	Acireductone dioxygenase	26511.5	24257.6	25967.4	26923.2	34294.7	32082.6	39023.7	37740.3
Q566R0	Them4	Acyl-coenzyme A thioesterase THEM4	2453.77	1582.98	1094.36	974.556	1165.81	2033.11	891.156	663.811
Q569C0	Tmem100	Transmembrane protein 100	32761.8	29419.3	41744.1	43388.2	38217.2	39388	40876.9	36959.5
Q5BJQ5	Rit2	GTP-binding protein Rit2	1710.18	1306.67	1462.31	1844.11	1236.61	1356.56	1528.56	1273.31
Q5BJT2	Ubl3	Ubiquitin-like protein 3	3042.97	2830.96	2728.19	2851.14	2121.06	2221.74	2232.17	4055.53
Q5BJU5	Cnih2	Protein cornichon homolog 2	2491.83	3749.59	4317.92	4557.53	5376.9	5834.88	6220.66	6503.07
Q5BJY4	Josd1	Josephin-1	1952.56	2313.82	1949.6	1787.86	3290.17	1914.95	2357.71	2872.03
Q5BK85	Tmed1	Transmembrane emp24 domain-containing protein 1	15156.7	12172	14290.2	15189.1	19537.2	17033.1	19791.1	17884.8
Q5CZZ9	Pip5k1b	Phosphatidylinositol 4-phosphate 5-kinase type-1 beta	7050.08	9040.65	9748.62	10072	7559.63	10278.7	9814.18	9316.65
Q5DWV2	Cdh7	Cadherin-7	39337.1	44900.7	29214.9	19976.4	26218.7	31500.4	24231.2	17316.1
Q5EB77	Rab18	Ras-related protein Rab-18	124342	123991	148553	173465	158572	161691	182820	145472
Q5FVF4	Tm7sf3	Transmembrane 7 superfamily member 3	9467.44	9878.5	9777.18	10517.5	12111.6	12318.8	12101.8	10259.7
Q5FVG2	Epb41l5	Band 4.1-like protein 5	13788.9	17146.1	15428.3	16618.5	18404.8	16639.2	19162.3	15948.7
Q5FVH4	Aktip	AKT-interacting protein	4465.58	6592.93	6884.56	6645.3	8577.8	8344.42	10364.7	9793.9
Q5FVN1	Stbd1	Starch-binding domain-containing protein 1	11470.4	12836.8	10566.5	10317.5	11565.2	11573.2	16308.3	14360.2
Q5GH56	Xkr7	XK-related protein 7	34053	40845	31851.2	25968.4	19986	25606.1	24334	21231.5
Q5GH59	Xkr4	XK-related protein 4	5429.17	3973.77	5590.21	4825.59	7711.75	6005.46	4880.41	6754.43
Q5HZE2	Tmem120a	Ion channel TACAN	34052.2	32069.3	43874.3	48641.9	46192.7	46314.4	52735	46875.6
Q5I0D6	Nostrin	Nostrin	4900.24	2793.16	3944.54	2684.14		2242.15	2228.28
Q5I0H3	Sumo1	Small ubiquitin-related modifier 1	11741.4	9601.58	7518.16	3874.38	3908.28	4845.24	5965.62	11783.2
Q5I6B8	Pip5k1c	Phosphatidylinositol 4-phosphate 5-kinase type-1 gamma	14322.4	15160.4	18846.1	18301.8	19663	20889.7	20832.3	19745.1
Q5M7U5	Rab19	Ras-related protein Rab-19	6663.11	7622.69	6642.96	8839.52	7657.5	8755.21	9294.54	8955.31
Q5M807	Rnf5	E3 ubiquitin-protein ligase RNF5	4268.58	5837.86	3485.88	6250.07	2334.02	3775.37	2195.32	2747.21
Q5M834	Dtnbp1	Dysbindin	5089.42	5470.02	4851.27	4414.9	3982.96	4449.85	4110.92	4622.38
Q5M836	Lysmd3	LysM and putative peptidoglycan-binding domain-containing protein 3	15455.8	7158.23	11638.8	10652.6	11873.2	13749.3	14901	13480
Q5PPM8	Pip4p1	Type 1 phosphatidylinositol 4,5-bisphosphate 4-phosphatase	45959.3	39901	53336.5	54574.6	51340.1	52971.2	52103.1	50934.4
Q5PQL3	Sppl2b	Signal peptide peptidase-like 2B	1000.3	800.981	791.072	1746.57	1937.37	1295.4	2563.26	2109.28
Q5PQL7	Itm2c	Integral membrane protein 2C	13004	12614.7	10981	12234.9	14858.1	11808.7	12324.5	12865.6
Q5PQV5	Tpbg	Trophoblast glycoprotein	24812.3	19227.4	15700.8	17226.1	14830.2	16616.6	19174.6	15138.9
Q5PT50	Slc10a7	Sodium/bile acid cotransporter 7	4602.86	1899.59	2564.98	4135.49	5205.17	5469.91	4872.94	5731.33
Q5RK27	Slc12a7	Solute carrier family 12 member 7	41230.7	45825.1	55677.8	53636	51157.7	57226.7	58893.9	54022.8
Q5RKJ1	Maea	E3 ubiquitin-protein transferase MAEA	16580.9	16655.4	20881.3	22310.7	24196.8	22512	25567.2	25158.8
Q5SGD7	Cnksr3	Connector enhancer of kinase suppressor of ras 3	9379.03	9487.57	10776.5	13023.1	11184.6	11540.1	12141.6	11966.2
Q5U2P1	Cnnm2	Metal transporter CNNM2	59621.4	55240.6	47649.3	46562.6	49321.1	46900.4	50676.4	46321.6
Q5U2R3	Frmd8	FERM domain-containing protein 8	9865.86	8526.75	10440.9	11271.1	11773.9	10247.5	11845.7	12016.8
Q5U2T1	Tlcd1	TLC domain-containing protein 1	19142	17910.1	24550.3	21987.5	29113.3	34367.8	32770.5	32671.1
Q5U2W6	Ptov1	Prostate tumor-overexpressed gene 1 protein homolog	12576.8	10935	13262	14436	17761.5	14870	16368.4	16563.9
Q5U2X5	Tnk2	Activated CDC42 kinase 1	12101.8	12870.5	16856.3	14774.8	15410.8	16607.1	16210.3	14383.3
Q5U2Y3	Mpp7	MAGUK p55 subfamily member 7	41199	42129.7	50590	42464.5	43624.9	48707.2	45306.3	41844.4
Q5U302	Ctnna1	Catenin (Cadherin associated protein), alpha 1	60324	58527.5	68312.3	52211.2	53979.4	62653	53483.6	46983.8
Q5U308	Lrrc8d	Volume-regulated anion channel subunit LRRC8D	30361.9	28958.2	20472.8	18936.4	21640.1	23842.9	21576.7	18432.8
Q5U316	Rab35	Ras-related protein Rab-35	171860	162344	192494	206871	200311	187072	204432	220975
Q5U3Y7	Tmem97	Sigma intracellular receptor 2	21871	8647.45	10340.2	22220.1	19156.4	15859.7	19088.9	15188.7
Q5XHY1	Carmil3	Capping protein, Arp2/3 and myosin-I linker protein 3	3580.67	4269.2	4730.31	4513.14	4315.77	4543.41	4260.45	4452.71
Q5XI43	Mxra8	Matrix remodeling-associated protein 8		2528.28		2374	943.057	1677.14	1321.01	3240.42
Q5XI52	Vezt	Vezatin	26522	24016	30997.9	31775.9	32579.9	32502.1	34335.4	32468.6
Q5XIE8	Itm2b	Integral membrane protein 2B	21773.9	22292.9	16051.3	15296	14510.9	21060.7	20214.7	16493.6
Q5XIH7	Phb2	Prohibitin-2	391040	285917	342059	446821	456109	396838	469317	442587
Q5XIJ5	Abhd17a	Alpha/beta hydrolase domain-containing protein 17A	18904.9	24124.3	24186.6	29355.5	25996.1	27036	30342.9	29235.9
Q5XIL0	Rnf167	E3 ubiquitin-protein ligase RNF167	3826.07	5052.87	2912.61	3258.66	2200.13	1886.06	2799.47	3730.87
Q5XIL2	Pi4k2b	Phosphatidylinositol 4-kinase type 2-beta	15353.7	14214.9	15920.7	16842.7	19303.6	18141.8	21758.4	20634.6
Q5XIM7	Kars1	Lysine--tRNA ligase	39234.6	42654.8	37433.1	46181.3	40717.1	41826.8	46791.3	49435.6
Q5XIQ4	Mgrn1	E3 ubiquitin-protein ligase MGRN1	24031.2	25889.2	32202.7	26993.9	26019.4	30787.2	30749.9	28324.5
Q5XIS9	Prkd2	Serine/threonine-protein kinase D2	14752.7	15701.6	17197.2	18445.5	19256.8	20109.6	21767.1	21176.3
Q5YLM1	Dagla	Diacylglycerol lipase-alpha	10191.7	8624.2	8690.23	10470.7	11397.3	10846.3	11783.3	10722.9
Q62634	Slc17a7	Vesicular glutamate transporter 1	10334.1	10438.2	15540.5	14787.8	17329.6	17704.4	17502.8	14456.4
Q62636	Rap1b	Ras-related protein Rap-1b	170086	167177	220294	225026	214389	215402	274182	259720
Q62640	Grid1	Glutamate receptor ionotropic, delta-1	18323.6	20318.7	16109	15144.5	15290.8	16464.8	15741.1	13716.2
Q62656	Ptprz1	Receptor-type tyrosine-protein phosphatase zeta	207725	190416	175668	148385	151224	176946	160369	133642
Q62682	Cntn3	Contactin-3	32133.2	31741	11875.3	15554.1	12906.4	16802.4	14142.3	11132.5
Q62696	Dlg1	Disks large homolog 1	62152.8	69035.8	67070.6	51677.8	52020.1	57446.4	51157.4	47943.6
Q62718	Ntm	Neurotrimin	3369.56	4117.47	3205.5	3763.68	3645.9	3340.7	3770.1	2909.18
Q62720	Slc30a1	Zinc transporter 1	17505.7	19563.3	15350.5	13987.9	13990.8	15509.3	13446.7	14209.4
Q62745	Cd81	CD81 antigen	187165	317502	188818	106366	66512.4	45177	92470.4	67051.3
Q62747	Syt7	Synaptotagmin-7	55131.7	57819.8	72272.7	68489.4	65929.3	77230.7	84515.7	72506.2
Q62769	Unc13b	Protein unc-13 homolog B	12170.6	14443.9	13980.7	15244.7	12156.8	14523	13535	12275.9
Q62784	Inpp4a	Inositol polyphosphate-4-phosphatase type I A	21256.4	20796.1	21340.9	21120	15993.5	19205.2	19390.5	19789.9
Q62796	Ralbp1	RalA-binding protein 1	12372.6	13889.3	14425.5	11315.7	14356.9	14901.3	12085.2	13444.1
Q62833	Grk5	G protein-coupled receptor kinase 5	10665.8	11675.5	12441.7	11987.6	11689.4	11405.6	12787.8	11707.8
Q62844	Fyn	Tyrosine-protein kinase Fyn	77045.2	68604.3	80757.9	78516.9	88942.2	85943.2	88404.5	97739.3
Q62847	Add3	Gamma-adducin	20381.6	19558.1	24989.8	22302	21811.1	24557.3	21858.6	20542.2
Q62866	Slc19a1	Reduced folate transporter	3063.11	2381.59	4468.96	2942.79	7629.51	3755.22	7346.74	5556.63
Q62868	Rock2	Rho-associated protein kinase 2	21628.2	24966.6	21902.9	18409.5	17481	19659.2	16994.6	16253.8
Q62888	Nlgn2	Neuroligin-2	27841.6	31318.6	17346.8	21983.2	17388.8	18339.8	19053.9	12842
Q62889	Nlgn3	Neuroligin-3	6034.21	5547.82	4568.78	4177.07	3454.04	5179.88	4785.9	4091.05
Q62897	Kcnd3	Potassium voltage-gated channel subfamily D member 3	4455.17	5208.63	6894.14	6341.82	5688.83	6039.96	7156.84	5880.95
Q62915	Cask	Peripheral plasma membrane protein CASK	81299.8	90599.9	97161.5	67792	74958.4	78446	72934.3	66054.9
Q62940	Nedd4	E3 ubiquitin-protein ligase NEDD4	64788.6	69387.2	69835.7	68482.3	71084.8	67834.7	67597.6	67295.5
Q62976	Kcnma1	Calcium-activated potassium channel subunit alpha-1	32652.7	34681	38182.9	40493.2	35795.4	40229.7	40655.2	40441.6
Q63016	Slc7a5	Large neutral amino acids transporter small subunit 1	93186.4	91838.1	65136.2	77018.7	80520.8	81997.4	90186.2	81071.5
Q63028	Add1	Alpha-adducin	88454.5	82701.9	96660.7	84692	81330.9	91162.3	81220.6	77420.7
Q63081	Pdia6	Protein disulfide-isomerase A6	650095	583096	597471	533321	420294	549970	538992	532819
Q63099	Kcnb2	Potassium voltage-gated channel subfamily B member 2	3201.94	2468.93	4164.07	4530.89	4640.1	3889.16	4551.91	4027.21
Q63132	Ros1	Proto-oncogene tyrosine-protein kinase ROS	1120.72			2271.14	2081.92		1147.45
Q63149	Cdh4	Cadherin-4 (Fragment)	399625	411538	230607	202810	212076	239325	228675	170533
Q63175	Serinc5	Serine incorporator 5	1540.56	1895.17	2861.1	3535.61	3040.99	2850.28	2412.29	3693.93
Q63198	Cntn1	Contactin-1	376705	399718	252218	226385	221393	253321	215427	156886
Q63199	Fas	Tumor necrosis factor receptor superfamily member 6	7085.71	4317.41	7274.17	7566.26	8444.98	5416.44	8648.95	6733.75
Q63210	Gna12	Guanine nucleotide-binding protein subunit alpha-12		6261.7	6198.98	4804.29	5801.67	5996.75	5603.22	5639.15
Q63257	Il4r	Interleukin-4 receptor subunit alpha	466.814	1179.52	651.168	584.531	912.536	407.666	905.593	373.485
Q63259	Ptprn	Receptor-type tyrosine-protein phosphatase-like N	53392.5	49205.8	55644.3	53191.9	63197	61656.7	74121.8	70788.5
Q63355	Myo1c	Unconventional myosin-Ic	384849	367369	404689	400130	384368	404651	361644	383069
Q63364	Pja2	E3 ubiquitin-protein ligase Praja-2	2553.81	4306.03	2575.76	2533.15	2998.15	2507.89	2659.34	3066.09
Q63372	Nrxn1	Neurexin-1	101864	100808	72968	69705.3	66966.7	73472.2	67182.6	57340.1
Q63377	Atp1b3	Sodium/potassium-transporting ATPase subunit beta-3	184596	177070	111704	107844	101038	127967	126291	90708.4
Q63406	Mcf2l	Guanine nucleotide exchange factor DBS	18837.8	18509.2	20972.3	21221.4	20747.8	21612.8	20740.5	20268.9
Q63433	Pkn1	Serine/threonine-protein kinase N1	18738.4	18628.9	18632.6	19788	20323	19510.7	19818.6	18952.3
Q63474	Ddr1	Epithelial discoidin domain-containing receptor 1	30315.7	28771.9	20016.5	17971.1	15115.1	21510.4	21377.3	21001.2
Q63475	Ptprn2	Receptor-type tyrosine-protein phosphatase N2	125628	123170	141805	160527	164846	161790	176394	167777
Q63481	Rab29	Ras-related protein Rab-7L1	7005.27	6290.76	7659.25	6170.04	7720.15	6221.24	8380.24	7160.73
Q63488	Slc20a2	Sodium-dependent phosphate transporter 2	24840.8	28183.6	32674.1	27877.6	31393.2	33869.7	35410.3	28061.8
Q63493	Cd1d	Antigen-presenting glycoprotein CD1d	22080.9	20491.9	22738.6	24129	32564.6	26762.2	37658.9	32904.6
Q63584	Tmed10	Transmembrane emp24 domain-containing protein 10	915532	785544	980372	908668	842420	1036330	982370	1000790
Q63604	Ntrk2	BDNF/NT-3 growth factors receptor	23397.1	23973.2	12007.4	11312.6	9475.62	10859.6	12344.1	10675
Q63622	Dlg2	Disks large homolog 2	11059.5	9626.73	8082.77	7058.04	8940.76	6722.31	7640.65	9383.97
Q63644	Rock1	Rho-associated protein kinase 1	50605.2	51219.5	54743.6	44390.6	42173	48000.7	39973.3	39497
Q63648	Nf2	Merlin (Fragment)	3243.84	2551.83	2766.2	2752.25	2950.43	2726.49	2701.78	2650.03
Q63713	Rasa2	Ras GTPase-activating protein 2	12765.8	15028.4	14794.5	13422.7	13198.3	14198.5	12773.9	12085.3
Q63722	Jag1	Protein jagged-1	2357.39	1900.36	832.088	1136.51	515.406	577.969	635.575	606.949
Q63768	Crk	Adapter molecule crk	4181.12	3767.43	2883.31	2357.98	2577.86	3894.75	3074.67	3197.93
Q63796	Map3k12	Mitogen-activated protein kinase kinase kinase 12	2599.5	2715.35	1908.7	2273.09	2459.09	1750.37	2168.49	2588.49
Q63803	Gnas	Guanine nucleotide-binding protein G(s) subunit alpha isoforms XLas	185602	186789	235533	224395	216258	203074	204047	210974
Q63881	Kcnd2	Potassium voltage-gated channel subfamily D member 2	2891.89	2425.66	3764.67	2860.69	2469.25	4029.18	2645.72	2691.31
Q63941	Rab3b	Ras-related protein Rab-3B	25269.8	22491.1	26343.1	32324.5	28304.3	26101	31705.4	30812.3
Q63942	Rab3d	GTP-binding protein Rab-3D	295089	233727	336178	357176	336835	338286	369031	354694
Q641Z6	Ehd1	EH domain-containing protein 1	174008	167685	217944	218542	214363	207984	238782	228237
Q64240	Ambp	Protein AMBP		3442.63	4589.31	4210.49	4100.78	2501.41	3640.77	3525.3
Q64259	Vhl	von Hippel-Lindau disease tumor suppressor	7120.08	7737.23	7393.17	10454.4	9647.49	9121.07	11660.8	10028.8
Q642B0	Gpc4	Glypican 4	185278	198815	163787	187147	203787	190009	219629	190353
Q64303	Pak2	Serine/threonine-protein kinase PAK 2	55154.7	64777.4	50001.8	48937.5	43386.4	49898.6	50004.7	53158.4
Q64537	Capns1	Calpain small subunit 1	33207.7	33633.6	39862	39016	32157.2	45900.1	52095.4	50922.3
Q64541	Atp1a4	Sodium/potassium-transporting ATPase subunit alpha-4	34036	18058.5	28377.6	26468.8	22991.2	23703.5	24896.6	20471.3
Q64542	Atp2b4	Plasma membrane calcium-transporting ATPase 4	34736.2	31592	41367.8	37567.8	43371.1	38964.8	43433.1	40978.1
Q64568	Atp2b3	Plasma membrane calcium-transporting ATPase 3	46133.3	37298.6	45498.4	43084.1	40793.8	43610.8	41820.5	41846.9
Q64605	Ptprs	Receptor-type tyrosine-protein phosphatase S	20016	22334.7	17425.7	19740.6	18077.6	19950.8	19179.3	17546.3
Q64649	Phka1	Phosphorylase b kinase regulatory subunit alpha, skeletal muscle isoform	20385	19502.1	20974.3	21904.4	21739.2	22759	22029.5	21454.5
Q64725	Syk	Tyrosine-protein kinase SYK	7862.5	8805.59	6117.73	5480.35	4990.28	6917.39	6851.5	8231.66
Q66H28	Pacc1	Proton-activated chloride channel	280824	247068	285631	304807	346439	325316	392355	346854
Q66H62	Cyld	Ubiquitin carboxyl-terminal hydrolase CYLD	14917.9	15932.6	15044.3	15005.9	13347.4	15012.4	12478.8	13171.7
Q66HL2	Cttn	Src substrate cortactin	32643	39259.5	30279.1	25872.7	19596.8	23249.6	17599	18205.5
Q66HR0	Slc12a9	Solute carrier family 12 member 9	96587.9	70918.2	112212	114035	128029	115851	122806	122909
Q68FQ2	Jam3	Junctional adhesion molecule C	65509	86430.6	51784.4	42950.9	52831.9	57379.2	61774.9	52987.8
Q68VK5	Tspan5	Tetraspanin-5	182.19	518.186	1180.82	791.29	891.357	221.233	1470.1	918.106
Q69BT7	Trappc4	Trafficking protein particle complex subunit 4	8621.38	9565.49	14195.9	13748.7	17820.2	20086.6	23929.1	20944.3
Q6AXQ4	Mtm1	Myotubularin	4910.98	5696.16	6205.41	6134.45	5508.47	7123.61	6922.07	7307.4
Q6AY17	Abhd17b	Alpha/beta hydrolase domain-containing protein 17B	50661.5	48278.5	59001.6	67124.3	62105.8	60144.4	67975.4	67191.6
Q6AY19	Coq8b	Atypical kinase COQ8B, mitochondrial	15539.1	12323.2	10224.1	14120.3	15633.6	11466.1	9598.38	9504.77
Q6AY41	Tmem30a	Cell cycle control protein 50A	14858.9	12225.5	15960.1	15277.4	20357.8	20848.6	23134.6	17514.7
Q6AY92	Slc44a3	Choline transporter-like protein 3	1865.37	1367.09	1378.16	955.495	948.343	1116.36	1582.04	1046.92
Q6AYC2	Irgm	Immunity-related GTPase family M protein	41610.2	40913.7	49581.9	56269.8	52077.4	54213.2	57910.2	56154.2
Q6AYF1	Mapkap1	Target of rapamycin complex 2 subunit MAPKAP1	22082.8	19982.4	15904.1	20329	18127	20747.6	20669.7	21906.6
Q6AYF7	Mfap3	Microfibril-associated glycoprotein 3	3308.86	4166.14	3712.32	3164.07	4164.08	4663.68	4157.04	4212.39
Q6AYH3	Rnf34	E3 ubiquitin-protein ligase RNF34	5973.96	7392.62	6143.19	6015.24	6667.88	5391.03	6150.6	6984.19
Q6AYP5	Cadm1	Cell adhesion molecule 1	245238	251214	117598	114026	123313	136610	138609	102624
Q6AZ61	Lmbrd1	Lysosomal cobalamin transport escort protein LMBD1	5516.97	6336.29	4858.82	6223.84	4071.04	4292.99	3805.91	6917.53
Q6IE75	Bace2	Beta-secretase 2	11610.4	9838.88	6762.52	6526.87	5513.96	6803.85	7728.02	6246.08
Q6IMF3	Krt1	Keratin, type II cytoskeletal 1	189393	273681	202606	222857	136109	129760	86494.2	123135
Q6IMY1	Mtus1	Microtubule-associated tumor suppressor 1 homolog		1854.57	1270.99	1136.39	1561.32	2067.63	1554.91	1138.45
Q6JE36	Ndrg1	Protein NDRG1	56370.5	60867.7	64322.3	56078.6	66709.8	67937.5	73022.4	66947.2
Q6JP77	Akap7	A-kinase anchor protein 7 isoforms delta and gamma	5491.4	4777.38	5138.78	4284.61	3182.62	3798.94	3623.1	3934.01
Q6MG61	Clic1	Chloride intracellular channel protein 1	57700.5	60506.1	67818.6	56668	56006.3	63535	66624.2	66080.9
Q6MG71	Slc44a4	Choline transporter-like protein 4	18812.4	15457.4	14514.8	15335.8	17276.4	16320.4	18502	17809.5
Q6MG82	Prrt1	Proline-rich transmembrane protein 1	102382	99303.9	112526	107141	92929.5	110554	110361	78217
Q6NX65	Pdcd10	Programmed cell death protein 10	16139.2	14220.9	15412.2	12069.7	18423.4	19770.9	19089.3	25198.4
Q6P689	Wls	Protein wntless homolog	12475.4	10427.2	14069.3	14342.1	19326.2	16371.3	21765.9	21846.7
Q6P6S2	Slc39a11	Zinc transporter ZIP11	10886.5	14430.1	14610.8	10821.3	7980.51	11909.8	12452.3	15016.8
Q6P730	Dab2ip	Disabled homolog 2-interacting protein	13499.4	13068.3	14386.4	12682.8	12533	12781.8	12444.7	12853
Q6P767	Pttg1ip	Pituitary tumor-transforming gene 1 protein-interacting protein	32966.9	31910.5	35058	25748.4	22450.3	30970.6	33013.4	34620.8
Q6P791	Lamtor1	Ragulator complex protein LAMTOR1	81651.9	93867	133079	136791	134802	142503	150411	128514
Q6P7C7	Gpnmb	Transmembrane glycoprotein NMB	3082.89			1275.05
Q6PCU2	Atp6v1e1	V-type proton ATPase subunit E 1	168024	145869	198060	216453	245073	245210	336139	310746
Q6Q0N0	Clstn1	Calsyntenin-1	11586.5	11678.1	11099.6	12101.6	8941.69	12165.9	10308.9	9790.6
Q6Q629	Dpp10	Inactive dipeptidyl peptidase 10	6181.81	5434.32	2873.97	3607.66	2310.55	3892.07	3666.95	3041.61
Q6QBQ4	Plscr3	Phospholipid scramblase 3	107196	96748.3	133344	102964	102667	127536	109767	94245.1
Q6RFZ7	Plekhg5	Pleckstrin homology domain-containing family G member 5	5441.8	3781.16	8024.53	6411.1	8096.9	7719.93	7731.59	8641.77
Q6RUV5	Rac1	Ras-related C3 botulinum toxin substrate 1	240925	197822	200263	215294	165643	157745	200562	197824
Q6TUD4	Yipf3	Protein YIPF3	24586.5	18080.9	25996.8	17342	32235	33448.7	29642.2	32533.6
Q6WAY2	Plppr1	Phospholipid phosphatase-related protein type 1	4788.63	5450.27	4810.94	2947.9	3621.24	3112.67	5038.66	4966.76
Q6WN19	Rtn2	Reticulon-2	2846.04		1115.06	2538.02	2685.23	3000.69	3808.95	3842.26
Q6X936	Kirrel1	Kin of IRRE-like protein 1	49576.3	65500.7	31546.8	29161.2	30094.8	34659.5	32612.2	26945.8
Q6XUX2	Dstyk	Dual serine/threonine and tyrosine protein kinase	36623.5	36330.8	41126.5	40192.4	44518.8	40642.2	40800.4	41488.4
Q71RP1	Hpse	Heparanase	27812.6	22633.7	26849	31188.2	33931.1	27361.7	27316.6	28961.4
Q761X5	Unc5c	Netrin receptor UNC5C	3158.27	7535.27	3839.81	5307.01	3905.83	4879.12	5410.95	5393.99
Q767H7	Pcdhac2	Cadherin-related neuronal receptor c2	3216.74	3279.03	2825.37	1953.65	2188.76	1823.79	2469.88	2366.32
Q767I1	Pcdha11	Cadherin-related neuronal receptor 11	14029.5	17017.4	14988.7	16542.2	16270.2	17064	17338	15582.3
Q767I6	Pcdha6	Cadherin-related neuronal receptor 6	10349.4	10543.3	7737.87	8555.77	7986.75	10028.8	9176.32	8224.96
Q78EA7	Bmpr1a	Bone morphogenetic protein receptor type-1A	13588.4	11383.9	9383.72	9179.64	10668.9	11585.4	11261.3	9087.92
Q78EG7	Ptp4a1	Protein tyrosine phosphatase type IVA 1	7010.47	6358.51	6146.61	7106.1	7091.3	3487.1	5312.65	4847.88
Q792I0	Lin7c	Protein lin-7 homolog C	8348.89	10027.9	8815.7	7137.17	9928.5	11187	8067.59	9327.12
Q794F9	Slc3a2	4F2 cell-surface antigen heavy chain	385167	450055	327327	302636	341229	350044	366788	330243
Q7TNJ2	Abca7	ATP-binding cassette sub-family A member 7	4692.12	4861.96	2776.43	3189.06	2360.68	3065.97	2486.76	1481.97
Q7TNJ4	Amigo2	Amphoterin-induced protein 2	20312	23078.4	12253.2	13252.7	12494.6	14239.6	15204.7	11449.9
Q7TP36	Shroom2	Protein Shroom2	13359.3	12966.5	13179.4	11400.7	10801.6	12230.7	9344.93	9806.76
Q7TP54	Ripor2	Rho family-interacting cell polarization regulator 2	4215.09	2658.86	2759.97	2814.69	3517.67	2476.17	3132.83	3150.06
Q7TSE9	Hax1	HCLS1-associated protein X-1	16207.5	15257.4	23707.4	26612.3	34393.8	28085.7	41115.8	39039.5
Q7TSY2	Lhfpl4	LHFPL tetraspan subfamily member 4 protein	1805.3	2717.3	2561.99	2041.1	2704.27	346.966	1411.35	2446.36
Q7TT49	Cdc42bpb	Serine/threonine-protein kinase MRCK beta	40339	40684.5	45760.2	40291.7	37275.2	42341.1	37667.8	36997.3
Q80W57	Abcg2	Broad substrate specificity ATP-binding cassette transporter ABCG2	3605.48	4804.42	4454.68	3017.53	4022.69	5217.82	5384.64	4092.57
Q80WD0	Rtn4rl1	Reticulon-4 receptor-like 1	5884.41	5227.22	3189.81	4018.85	3647.14	4205.17	5156.92	5177.41
Q80WD1	Rtn4rl2	Reticulon-4 receptor-like 2	4964.18	5878.3	3492.61	3218.69	2505.9	3649.06	2534.98	2826.14
Q80WE1	Fmr1	Fragile X messenger ribonucleoprotein 1	63900.3	69039	73483.7	65251.8	56080.4	73111	66566	68165
Q80X08	Washc2	WASH complex subunit 2	12299.4	11007.3	6591.36	7690.94	7836.2	9078.77	7319.27	5773.14
Q80ZD7	Amigo1	Amphoterin-induced protein 1	11428.8	11398.2	6079.93	7103.03	6092.71	7342.79	6614.2	5381.3
Q80ZG1	Ric8a	Synembryn-A	12972.3	12892.1	16606.5	16237.6	15502	16134.9	15408.5	16497.9
Q810W7	Mast1	Microtubule-associated serine/threonine-protein kinase 1	42885.1	43061.7	48070.3	44096.3	48046.7	47328.1	42853.7	41105
Q811A2	Bst2	Bone marrow stromal antigen 2	5912.52	5004.19	7581.8	8374.09	6204.22	9441.2	11826.3	11219.5
Q8CF82	Abca5	Cholesterol transporter ABCA5	17396.3	15528.3	17172.7	16253.4	13850.5	15836.1	15608.4	13555.1
Q8CFC9	Lzts1	Leucine zipper putative tumor suppressor 1		973.153	445.583	538.498	815.684	473.286	296.259	297.848
Q8CFN2	Cdc42	Cell division control protein 42 homolog	213614	221547	259600	257433	251619	233707	263101	273331
Q8CG09	Abcc1	Multidrug resistance-associated protein 1	49696.8	51310.9	57543.4	53073.1	54514.6	54814.3	54443.4	49259.8
Q8CHL0	Fzd5	Frizzled-5	4135.1	5531.18	2818.91		2989.19		1457.51
Q8CIN9	Rffl	E3 ubiquitin-protein ligase rififylin	2047.93	2098.07	1465.61	2060.93	2927.64	1689.12	2324.5	2307.76
Q8CIY2	Duox1	Dual oxidase 1	10636.8	8280.04		8184.8			10449.7
Q8JZQ0	Csf1	Macrophage colony-stimulating factor 1	1980.23	1922.81	1118.28	1743.62	1765.11	1658.41	2335.96	1954.85
Q8K3V3	Adgrg1	Adhesion G-protein coupled receptor G1	5273.81	6305.16	3208.03	4121.9	3860.01	2483.47	4081.14	4193.17
Q8K4C8	Fzd9	Frizzled-9	2815.14	2615.28	3090.12	1765.35	2604.83	2398.65	2920.24	2941.96
Q8K5A9	Nradd	Death domain-containing membrane protein NRADD	47383	60701.3	27144.9	27418.3	26949.5	26694.5	31333.5	18651.1
Q8R1R5	Cd99l2	CD99 antigen-like protein 2	34320.3	29920.2	20833.9	15696.3	24667.5	26297.7	37436	29169.3
Q8R2H2	Itgb3	Integrin beta-3	8563.19	7683.21	8128.09	6827.22	7769.17	9115.64	8341.09	6320.99
Q8R3Z7	Ehd4	EH-domain-containing 4	36177.2	36695.7	40838.9	42129.7	40215.2	42068.8	47040.8	43828.9
Q8R491	Ehd3	EH domain-containing protein 3	85044	79430.3	110275	97992.6	95241.5	102142	117274	111627
Q8R4C1	Atp2c2	Calcium-transporting ATPase type 2C member 2	1211.06		2995.41	2087.26	809.365	2782.52
Q8R4E1	Itfg1	T-cell immunomodulatory protein	19930.6	23185.6	19680	21756.2	16785.5	12715.4	21231.8	22698.5
Q8R511	Fnbp1	Formin-binding protein 1	6644.53	9130.81	8660.69	8035.54	7517.06	10085.5	8661.78	9400.6
Q8R553	Clstn3	Calsyntenin-3	17587.8	14742.6	17180.9	18252.5	17518.5	17937.1	17669.9	15828.6
Q8VDA1	Clstn2	Calsyntenin-2	8621.51	7422.93	6945.69	7796.81	6532.1	7102.94	5510.94	8189.33
Q8VGC3	Cacnb2	Voltage-dependent L-type calcium channel subunit beta-2	19446.4	21104.9	21501.7	20608.7	17937.1	21130.7	20482.5	19964.7
Q8VHF0	Mark3	MAP/microtubule affinity-regulating kinase 3	60229.2	69716.9	75603.7	70727.8	68517.2	73528.7	73472.6	71924.5
Q8VHW9	Cacng4	Voltage-dependent calcium channel gamma-4 subunit	7555.02	7838.14	8851.72	7002.3	9992.31	9437.73	12386.2	7659.03
Q8VHZ8	Dscam	Cell adhesion molecule DSCAM	5532.35		4576.02	6862.43	7822.97	7770.03	4868.87	4924.5
Q8VII6	Slc44a1	Choline transporter-like protein 1	89358.8	102647	77953.8	73856.7	80054.9	88742.3	95862.8	83168.3
Q91XS8	Stk17b	Serine/threonine-protein kinase 17B	1375.51	2037.2	3243.1	1431.66	2293.9	1815.96	3764.32	3331.76
Q91XT9	Asah2	Neutral ceramidase	702.846				501.558
Q91Y77	Slc16a10	Monocarboxylate transporter 10	20209.6	21335.1	15990.5	14456.4	11626.6	10006	10987.2	9888.49
Q91ZQ0	Vmp1	Vacuole membrane protein 1	15824.2	11009.2	17535.1	17237.7	21553	20745.6	25959.4	20580.3
Q920G2	Slc9a3r2	Na(+)/H(+) exchange regulatory cofactor NHE-RF2	2261.93	2741.09	994.424		1568.69			835.466
Q920Q0	Palm	Paralemmin-1	17527.2	15127.4	19148.6	15183.8	20965.9	22138.8	23031.8	21309
Q921A2	Slc2a13	Proton myo-inositol cotransporter	12240.8	11577.8	13208.9	12984	13268.4	17313.2	16213.7	14058.9
Q923U9	Slc40a1	Solute carrier family 40 member 1	56363.2	83891.4	44768.2	34293.1	28685.6	45874.4	34213.6	22663.7
Q924A5	Slc36a1	Proton-coupled amino acid transporter 1	7690.71	6493.32	11248.1	7808.46	21218.9	20699.4	21771.9	18889.8
Q924C3	Enpp1	Ectonucleotide pyrophosphatase/phosphodiesterase family member 1	414144	430883	254341	234572	273918	271606	263618	226572
Q924N5	Acsbg1	Long-chain-fatty-acid--CoA ligase ACSBG1	5744.2	6001.22		4520.59			2991.04	2414.99
Q925N7	Ocil	C-type lectin domain family 2 member D5		11039.8		14677.5	17074.5	16315.2	16671
Q99376	Tfrc	Transferrin receptor protein 1	745495	741564	424165	422444	363024	418279	422274	330661
Q99J82	Ilk	Integrin-linked protein kinase	93387.7	92705.8	94736.4	96418.5	111296	92047	104738	113354
Q99J86	Atrn	Attractin	23771	24525.9	21215.6	19824.2	18742.5	21321.9	18411.3	16741.6
Q99JD4	Clasp2	CLIP-associating protein 2	49428.4	55052.2	48836.6	46895.6	43472.3	46804	46903.9	46791.1
Q99M64	Pi4k2a	Phosphatidylinositol 4-kinase type 2-alpha	106762	101079	140502	144087	138510	148639	156312	148495
Q99M75	Rtn4r	Reticulon-4 receptor	16088.3	15954.2	8145.3	7717.69	6883.74	8450.2	9903.01	6271.54
Q99N01	Slco4a1	Solute carrier organic anion transporter family member 4A1	6765.07	7273.58	6633.62	7517.04	5359.52	5816.87	6930.6	5570.53
Q99N02	Slco3a1	Solute carrier organic anion transporter family member 3A1	55135.5	38368	64998.5	49800.3	61491.8	58346	66307.2	58353.5
Q99P55	Sgpp1	Sphingosine-1-phosphate phosphatase 1	11881.6	8731.63	8068.65	8010.31	8130.45	9569.7	11060.9	9709.86
Q99P75	Rab9a	Ras-related protein Rab-9A	62382.7	54995.7	89284.5	96004.7	123153	105505	122501	124239
Q99P84	Plce1	1-phosphatidylinositol 4,5-bisphosphate phosphodiesterase epsilon-1	1573.06	2989.68	2512.39	4490.78	1375.45	2573.44	2678.52	464.899
Q99PW3	Neu1	Sialidase-1	33901.1	39722.5	40047.8	46411.9	42900.7	43013.7	47297.8	50798
Q99PW5	Neu3	Sialidase-3	3310	4864.85	4920.44	4123.68	4941.4	5441.39	4186.83	4631.51
Q9EPH2	Marcksl1	MARCKS-related protein	7021.38	8697.16	2931.84	482.947			894.465	2619.61
Q9EPT8	Clic5	Chloride intracellular channel protein 5	12131.9	12112.5	12090.8	12867.5	11622.9	12430.7	10806.1	11923.5
Q9EQ25	Slc38a4	Sodium-coupled neutral amino acid transporter 4	237912	260178	123613	132092	194309	198206	186107	175392
Q9EQ60	Cacna1h	Voltage-dependent T-type calcium channel subunit alpha-1H	7228.08	8264.05	5901.68	7028.94	5790.25	6353.94	5585.22	5222.24
Q9EQH1	Gab2	GRB2-associated-binding protein 2	15837.3	15234.2	18498.3	16032	12038.2	14411	12812.6	11925.2
Q9ER31	Entpd6	Ectonucleoside triphosphate diphosphohydrolase 6		2201.28		1445.78	1312.24	1694.42	977.018	1631.8
Q9ERE4	Golph3	Golgi phosphoprotein 3	14729.3	16911.1	13510.4	16625.9	11795.3	9622.57	10870.8	11576
Q9ERQ6	Cspg5	Chondroitin sulfate proteoglycan 5	14102.8	14334.4	9484.46	9554.23	10240.6	11944.5	11886.1	10114.3
Q9ES19	Atf4	Cyclic AMP-dependent transcription factor ATF-4	454.6			455.618			1031.42	896.361
Q9ES40	Arl6ip5	PRA1 family protein 3	84338.9	68508.6	117721	123614	143014	110462	172191	150548
Q9ES73	Maged1	Melanoma-associated antigen D1	24492.7	32669.9	32888.7	34346.9	39101.1	33690.4	38849.8	33315.8
Q9ESQ5	Trpm4	Transient receptor potential cation channel subfamily M member 4	5829.37	3959.21	3139.62	3316.49	2740.55	3372.88	3143.48	1601.14
Q9ESQ7	Psd	PH and SEC7 domain-containing protein 1	7726.38	8623.23	6839.22	6452.81	7167.03	7432.11	7358.24	6907.91
Q9HB97	Parva	Alpha-parvin	6106.16	3968.91	2448.33	2736.43	3746.16	4559.06	2674.33	3944.22
Q9JHE5	Slc38a2	Sodium-coupled neutral amino acid symporter 2	80495.4	55413.5	81898.3	74392.2	76013.9	69946.2	66887.6	62130.2
Q9JHL4	Dbnl	Drebrin-like protein	92215.5	103263	111613	99644.6	95338.2	101370	84862.1	93197.3
Q9JHW1	Cpd	Carboxypeptidase D	179186	151488	194769	195304	168237	186604	174145	165471
Q9JHY1	F11r	Junctional adhesion molecule A	135695	168754	94893.9	88871.2	94793.2	112511	117254	86120.6
Q9JI66	Slc4a4	Electrogenic sodium bicarbonate cotransporter 1	180046	161663	111346	93055.6	120288	127096	120084	91138.5
Q9JI92	Sdcbp	Syntenin-1	8504.64	9194.77	7608.65	9038.56	7992.79	8414.28	8294.09	7501.73
Q9JID2	Gna11	Guanine nucleotide-binding protein subunit alpha-11	94619.4	96206.3	132971	121729	125399	126484	141349	145103
Q9JIR1	Rimbp2	RIMS-binding protein 2	4437.53	4355.54	5383.17	3775.07	4205.15	4999.57	6208.16	6147.08
Q9JIS1	Rims2	Regulating synaptic membrane exocytosis protein 2	13797.8	13664.9	13962.5	11885	13390.6	12251.4	11995.2	11685.6
Q9JJ19	Slc9a3r1	Na(+)/H(+) exchange regulatory cofactor NHE-RF1	4284.84	3613.54	1439.8	3346.12	4095.71	2794.59	2772.06	3280.75
Q9JJ40	Pdzk1	Na(+)/H(+) exchange regulatory cofactor NHE-RF3	6818.99		5252.27	7825.69	10352.4	6857.6	4130.17	3900.16
Q9JJ79	Dync2h1	Cytoplasmic dynein 2 heavy chain 1	9300.49	12243	17619.8	14696	26185.6	26200.5	55608.5	45558.8
Q9JJK1	Gpm6b	Neuronal membrane glycoprotein M6-b	3807.95	5941.19	3003.86	2723.26	4571.33	5440.24	4848.98	4143.75
Q9JJP9	Ubqln1	Ubiquilin-1	2575.77	1054.79	2808.22	2243.44	4218.48	2661.28	5542.07	5460.93
Q9JJZ1	Slc2a8	Solute carrier family 2, facilitated glucose transporter member 8	1672.19	1592.51	1012.85	1879.56	2116.5	1718.91	2502.51	1868.91
Q9JK11	Rtn4	Reticulon-4	326311	312222	334440	279006	245110	291794	242394	217085
Q9JK41	Slc31a1	High affinity copper uptake protein 1	10647.9	8119.66	10217.8	10499.6	11150.3	9837.69	12830	13861.4
Q9JK71	Magi3	Membrane-associated guanylate kinase, WW and PDZ domain-containing protein 3	12061.8	11865	10951	9044.83	9183.39	11372.7	8853.6	9420.18
Q9JKA7	Hcn4	Potassium/sodium hyperpolarization-activated cyclic nucleotide-gated channel 4	19686.4	19482.1	18497.7	17061.4	17476.6	19087.1	17299.4	14872.6
Q9JKA9	Hcn2	Potassium/sodium hyperpolarization-activated cyclic nucleotide-gated channel 2	3466.63	2981.23	3278.24	3085.63	3096.44	3687.7	3461.5	2351.25
Q9JKE3	Scamp5	Secretory carrier-associated membrane protein 5	92761.2	66598.9	113523	143975	127378	135484	129901	124302
Q9JKR5	Zdhhc2	Palmitoyltransferase ZDHHC2	11632.4	13910.9	16296.4	15701.3	13211.9	14483.9	14866	14384.1
Q9JL55	Gde1	Glycerophosphodiester phosphodiesterase 1	35894.8	40210.6	38694.3	38255.4	34494	35506.7	25081.4	26174
Q9JM15	Slc38a1	Sodium-coupled neutral amino acid symporter 1	14235.8	15083.6	19094.8	16169.6	20501.4	22454.1	23345.9	21566.4
Q9JM80	Pag1	Phosphoprotein associated with glycosphingolipid-enriched microdomains 1	8895.76	13337.7	7942.35	6880.65	6502.33	9757.47	6848.14	5814.5
Q9JMI9	Trpc3	Short transient receptor potential channel 3	15579.4	13975.5	21120.5	19119	16430	12140.1	16841.8	15592.6
Q9P290	Slc22a17	Solute carrier family 22 member 17	4451.79	3442.71	4322.33	4021.91	3064.98	4213.36	4554.61	3804.5
Q9QW30	Notch2	Neurogenic locus notch homolog protein 2	9715.16	9462.65	8401.07	6512.19	6776.16	7805.89	6406.33	5933.17
Q9QWJ9	Nrp1	Neuropilin-1	24710	28293.3	21179	20331.4	18435	20478	19143.2	16161.5
Q9QX69	Lancl1	Glutathione S-transferase LANCL1	49288.3	59799.9	53251.5	62971	57060	56819.4	63731.1	66307.6
Q9QX74	Shank2	SH3 and multiple ankyrin repeat domains protein 2	23080.7	25256.8	23390.8	20452.9	20332.5	20652.8	19182.5	17994.7
Q9QY17	Pacsin2	Protein kinase C and casein kinase substrate in neurons 2 protein	10336.1	12169.2	10178.6	11309.2	11557.8	11529.7	10459.5	11444.3
Q9QYM0	Abcc5	ATP-binding cassette sub-family C member 5	10690.6	13750.5	12058.2	12777.6	12434.8	11112.6	10918.9	12472
Q9QYP1	Lrp4	Low-density lipoprotein receptor-related protein 4			1065.37	707.19	664.042	1004.48	875.783
Q9QYP2	Celsr2	Cadherin EGF LAG seven-pass G-type receptor 2 (Fragment)	27257.9	29542.8	20838.2	16967.4	18619.3	21872.3	17884.3	13899.6
Q9QYV1	Tmeff1	Tomoregulin-1	2772.1	3601.19	977.724	569.337	834.439	1519.94	1069.8	682.389
Q9QZC5	Grb7	Growth factor receptor-bound protein 7	19968.4	23882.9	23223.4	26416.6	24225.6	24807	27285.4	26363
Q9QZK5	Htra1	Serine protease HTRA1	6043.56	6001.39	7229.7	9353.04	10266.5	10630.7	11610.5	12393.5
Q9R066	Cxadr	Coxsackievirus and adenovirus receptor homolog	322326	378268	220222	181933	213439	256569	273091	187846
Q9R080	Gpsm1	G-protein-signaling modulator 1	48070.1	46325.7	47747.3	47023.7	49858.8	53298.3	49328.2	48615.3
Q9R0C9	Sigmar1	Sigma non-opioid intracellular receptor 1	26568.8	36208.5	31332.4	31841.4	36180.4	38222.4	37813.7	37831.1
Q9R0I8	Pip4k2a	Phosphatidylinositol 5-phosphate 4-kinase type-2 alpha	14694.8	15072.6	14510.8	17873.1	19794.6	17290.4	17634.1	14881.6
Q9R0T4	Cdh1	Cadherin-1	444968	548531	331099	273795	241249	326134	293192	221558
Q9R172	Notch3	Neurogenic locus notch homolog protein 3	14283.7	17225.8	19395.2	19562.5	15603.4	14548.6	15450.3	12566
Q9R175	Ifitm2	Interferon-induced transmembrane protein 2	210422	176306	131447	209829	183653	234118	203172	179355
Q9R1K2	Tenm2	Teneurin-2	23213.7	23487.6	16820.9	15555.1	14115.7	16848.5	15479.8	13287.1
Q9R1N3	Slc4a7	Sodium bicarbonate cotransporter 3	19824.8	23007.4	25297.6	19967.3	22918.4	23362.2	23462.7	21476.9
Q9WTQ1	Prkd1	Serine/threonine-protein kinase D1	10919.9	9015.67	10900.8	9913.81	9512.38	9960.93	10893.3	9306.63
Q9WTQ2	Podxl	Podocalyxin	473.544	988.349	857.111	927.886	1275.92	1028.02	1656.41	433.274
Q9WTR8	Phlpp1	PH domain leucine-rich repeat protein phosphatase 1	11747.7	11506.3	14144.8	10893	11721.7	13645.5	11617.9	10689.7
Q9WTW8	Slc23a2	Solute carrier family 23 member 2	19720.1	26852.2	34301.6	28269.1	27177	28975.5	28684.3	25224.9
Q9WTY2	Rem2	GTP-binding protein REM 2	6036.25	7300.88	7960.43	7989.28	11164.8	11075.9	10073.2	13243.8
Q9WU70	Stxbp5	Syntaxin-binding protein 5	43846.2	51131.2	52407.9	52597.8	47998.9	57557.7	52023.5	54268.6
Q9WU74	Lsr	Lipolysis-stimulated lipoprotein receptor	88729.2	98697.9	86709.9	78402.4	82847.3	83855.6	89059.4	79491.6
Q9WU82	Ctnnb1	Catenin beta-1	79390.1	86106.4	96838.1	77574.8	72365.4	86286.4	68169.7	63223.4
Q9WUD2	Trpv2	Transient receptor potential cation channel subfamily V member 2	7937.81	9040.42	9443.35	8869.13	10659.3	9289.63	10170.7	8806.65
Q9WUD9	Src	Proto-oncogene tyrosine-protein kinase Src	49794.3	45364.4	53553.3	53965.9	51382.9	51869.4	60321.4	57383.6
Q9WUF4	Vamp8	Vesicle-associated membrane protein 8	23435.3	14193.7	15401.7	16405.3	20273.3	17369.1	24121.7	23694
Q9WVB9	Dvl1	Segment polarity protein dishevelled homolog DVL-1	43740.1	44668.5	47603.8	50410.3	49194	53720.7	46160.9	39133.1
Q9WVE9	Itsn1	Intersectin-1	11540.9	11704.9	10451.1	8878.7	9451.25	9272.47	9034.48	9226.58
Q9WVJ6	Tgm2	Protein-glutamine gamma-glutamyltransferase 2	13624.2	15417.5	13710.4	12087.1	10838.7	11111	9850.26	10281.8
Q9WVR1	Inpp5e	Phosphatidylinositol polyphosphate 5-phosphatase type IV	10255.9	11332.5	12717.7	11944.9	12809.1	13856.2	13822.2	14940.8
Q9WVR3	Inppl1	Phosphatidylinositol 3,4,5-trisphosphate 5-phosphatase 2	42561.6	44152	45433.3	43613.6	39907.3	42644	35430.4	37549.7
Q9Z0J8	Negr1	Neuronal growth regulator 1	31481	31482.4	9487.16	9681.99	10349.8	14364.7	14632.2	8951.2
Q9Z0U4	Gabbr1	Gamma-aminobutyric acid type B receptor subunit 1	3377.45	4383.8	3388.85	3328.66	3604.92	3662.47	2257.73	3729.72
Q9Z0W5	Pacsin1	Protein kinase C and casein kinase substrate in neurons protein 1	6028.28	8122.34	7473.9	7079.56	5873.16	6055.5	5951.57	5326.15
Q9Z0W7	Clic4	Chloride intracellular channel protein 4	16355.4	18617.5	19941.7	23359.3	24694.3	22629.9	21966.4	22554
Q9Z143	Sema4f	Semaphorin-4F	3857.87	6644.29	5990.73	6024.52	5329.21	5702.56	5736.37	3523.99
Q9Z173	Adgrl3	Adhesion G protein-coupled receptor L3	19812.1	20200.6	10767.9	10322	10364.6	11249.8	10932.9	7871.3
Q9Z1A5	Nae1	NEDD8-activating enzyme E1 regulatory subunit	10036.5	11230.5	10821.1	9569.47	10287.9	10215.9	9906.5	10534.9
Q9Z1E1	Flot1	Flotillin-1	44667.6	44725.6	57666.8	57094.4	58107.2	61184.5	74422.3	63053
Q9Z1L1	Cldn7	Claudin-7	4573.58	6843.45	8342.26	6509.39	5306.8	7634.24	6476.63	5877.78
Q9Z1P2	Actn1	Alpha-actinin-1	49164.3	50626.5	56734.3	48931.4	51082.7	56371.8	49504.6	45089.7
Q9Z1X1	Esyt1	Extended synaptotagmin-1	151431	134212	206988	212749	190487	206302	220319	211149
Q9Z1Y3	Cdh2	Cadherin-2	146587	146976	87657.5	73518.9	66822.3	80852.1	82446	64591.8
Q9Z270	Vapa	Vesicle-associated membrane protein-associated protein A	109162	89632.5	114337	146435	127437	128444	145850	150650
Q9Z2H4	Lgr4	Leucine-rich repeat-containing G-protein coupled receptor 4	34115.1	36978.8	21822.2	16352	12931.9	17391.7	17310.3	12496.7
Q9Z2L0	Vdac1	Voltage-dependent anion-selective channel protein 1	324262	201558	306637	315473	404200	344282	475320	442320
Q9Z2S9	Flot2	Flotillin-2	56200	53447.7	59951.2	60227	57621.5	59075.4	80229.5	64972.8
Q9Z2T2	Kcnk1	Potassium channel subfamily K member 1	1451.53		2888.72	2751.37	2994.67	2527.17	2444.75	3946.56
Q9Z2Y9	Kl	Klotho	2233.87	1203.29	3889.88	3674.69		2220.59	3317.91	4102.16
Q9Z340	Pard3	Partitioning defective 3 homolog	23496	21777.6	21237.6	19325	20393.9	19655.7	19295.4	18495.5
