# Supplementary material for: Endogenous cell membrane interactome mapping for GLP-1 receptor via ligand-based proximity labeling
Source: Research Square preprint supplement (doi:10.21203/rs.3.rs-3449159/v1), 2023-10-27
Supplement: Supplementary file 3 [file 6e35f56052e74a2038eb1870.xlsx]

## Sheet: qPCR primer
Supplementary Table 5: Lists of plasmid primer, qPCR primer and siRNA sequences
Target names	Forward Primers	Reverse primers
Gipr	TGACCGAGGAACAGGCTGAAGG	CAGTAGAGCACACTCACGAGGAAAC
Atp1b3	TGGCTGCACTCTTCACATTCACC	GAATCTGGTCTCGGTACTTCGGAAC
Slc4a4	AATCCAGCAGCAGCATCCTCAAG	CTTCCATTCCATCTCCTGTCCATCC
Efnb1	GTGCTGGCTGCGTCATCTTCC	CTGTGTATGCTTGCGATGTCGTTTG
Gabbr2	AGGTGAAGGTCGGCGAATACAAC	CGGACAGGATGCTATACAGTGGAAG
Enpp1	CACCAGAGTCATCCGCAGTCAAG	GTGAGGCAAGAGGAAGGCTGAAG
Gpc4	AAGCGGAAGCGGATGTGAATATCAG	CAGAGGGCAGCGAGGAGATAGG
Prnp	TCACCATCAAGCAGCATACAGTCAC	CCACCACACGCTCCATCATCTTC

## Sheet: Plasmid primer
Plasmid names	Forward Primers	Reverse primers
Glp1r-3×FLAG	TCTGTCCTACATCTTCTGCCTCGTGTTCGCCGGCCCCCGCCCCCAGGGTGCCACGGTGT	TCCTTGTAGTCGCCAGAGCCCCCTCCGGATCCGCCGCTGCAGGAATTTTGGCAGGT
GLP1R-3×FLAG	TCTGTCCTACATCTTCTGCCTCGTGTTCGCCAGGCCACAGGGAGCAACCGTGTCTCTGT	CAGAGCCCCCTCCGGATCCGCCGGAACAGCTGGCCTGGCATGTGGCGGTGT
FLAG-Glp1r	GACTACAAGGACGATGATGACGCCGGATCCGGCCCCCGCCCCCAGGGTGCCA	CGGGTTTAAACGGGCCCTCTAGATCAGCTGCAGGAATTTTGGCAGGTGGCTGCATACAC
HA-Gipr	TCCCAGACTACGCCGGATCCGAGGGCGGAGACAGATTCTGAG	GTTTAAACGGGCCCTCTAGACTAGCAGTAACTTTCCAAGACCTCATCTC
Atp1b3-HA	CCCTGAGCTACATCTTCTGCCTGGTATTCGCCACGAAGACTGAGAAGAAATCCTTC	CGTAGTCTGGGACGTCGTAGGGATAGGATCCGGCATGTGCTATGACTTTAAATGAAAC
HA-Slc4a4	ATCCCTACGACGTCCCAGACTACGCCGGATCCATGGAGGATGAAGCTGTCCTGGACAGA	GCGGGTTTAAACGGGCCCTCTAGATCAGCATGATGTGTGGCGTTCAAGGAATGTT
HA-Efnb1	CCCTACGACGTCCCAGACTACGCCGGATCCGCCACGCCGTTGGCCAAGAACCTGGAGCC	CAGCGGGTTTAAACGGGCCCTCTAGATCAGACCTTGTAGTAGATGTTCGCCGGGCTCTG
HA-Gabbr2	CCTACGACGTCCCAGACTACGCCGGATCCTGGACGCGGGGCGCCCCCCGG	AGCGGGTTTAAACGGGCCCTCTAGACTACAGGCCCGAGACCATGACTCGGAAGGAGGGT
Enpp1-HA	CCCTGAGCTACATCTTCTGCCTGGTATTCGCCGAGCGCGACGGCGAACAGGCAGGGCA	GTAGTCTGGGACGTCGTAGGGATAGTCTTCTTGGCTGAAGATTGGTAAGTGTGTTTTCA
HA-Gpc4	CGACGTCCCAGACTACGCCGGATCCGCGGAGCCCAAGTCGAAAAGTTGTTCGGAAGTGC	CAGCGGGTTTAAACGGGCCCTCTAGATTATCTCCACTCTCCCTGCACAGCGAGGAACAG
HA-Prnp	CGTCCCAGACTACGCCGGATCCCGGAGGGTGGAACACTGGTGGAAGCCGGTAC	GTTTAAACGGGCCCTCTAGATCATCCCACGATCAGGAAGATGAGGAAGGAGATGAGGAG
HA-NECTIN3	GGTTTAAACGGGCCCTCTAGACTAAACATACCACTCCCTCCTGGAAATTACGGAA	TACGACGTCCCAGACTACGCCGGATCCGGACCAATTATTGTGGAGCCACATGT
HA-SCGE	CTACGACGTCCCAGACTACGCCGGATCCCAATTGCCCCGGTGGTGGGAG	TCAGCGGGTTTAAACGGGCCCTCTAGATCAGGGATACCATTTACCTGTAG
STX-HA	GCCCTGAGCTACATCTTCTGCCTGGTATTCGCCCGGGACAGGACCCACGAGC	GACGTCGTAGGGATAGCCAGAGCCCCCTCCGCTTCCGCCTCCAACCACTGTGACGCCAA

## Sheet: siRNA
siRNA	Sense（5'-3'）	Antisense（5'-3'）
Gipr-siRNA-1	CCACACUCAAUGUGAGAAU(dT)(dT)	AUUCUCACAUUGAGUGUGG(dT)(dT)
Gipr-siRNA-2	GCUUCACUGCACUCGUAAU(dT)(dT)	AUUACGAGUGCAGUGAAGC(dT)(dT)
Gipr-siRNA-3	CUACUGCUUCAUCAACAAA(dT)(dT)	UUUGUUGAUGAAGCAGUAG(dT)(dT)
Atp1b3-siRNA-1	GGAAGCUGUUCAUCUACAA(dT)(dT)	UUGUAGAUGAACAGCUUCC(dT)(dT)
Atp1b3-siRNA-2	GGCCGAUGCUACCAAGAAA(dT)(dT)	UUUCUUGGUAGCAUCGGCC(dT)(dT)
Atp1b3-siRNA-3	GUCUCAUCUUGCUCUUCUA(dT)(dT)	UAGAAGAGCAAGAUGAGAC(dT)(dT)
Slc4a4-siRNA-1	GCAGAACGUAUCCGAUUCA(dT)(dT)	UGAAUCGGAUACGUUCUGC(dT)(dT)
Slc4a4-siRNA-2	GACGAGGUGUUCCACGAUA(dT)(dT)	UAUCGUGGAACACCUCGUC(dT)(dT)
Slc4a4-siRNA-3	GUGGAUACUCCGAAGCUAA(dT)(dT)	UUAGCUUCGGAGUAUCCAC(dT)(dT)
Efnb1-siRNA-1	GCUUGGUGAUCUACCCGAA(dT)(dT)	UUCGGGUAGAUCACCAAGC(dT)(dT)
Efnb1-siRNA-2	CGGCGAACAUCUACUACAA(dT)(dT)	UUGUAGUAGAUGUUCGCCG(dT)(dT)
Efnb1-siRNA-3	CUAUGAAGAUUGUUAUGAA(dT)(dT)	UUCAUAACAAUCUUCAUAG(dT)(dT)
Gabbr2-siRNA-1	CGCCUGUUCUUGCGGAUAA(dT)(dT)	UUAUCCGCAAGAACAGGCG(dT)(dT)
Gabbr2-siRNA-2	GGUCAAGUUGUGUUCCGGA(dT)(dT)	UCCGGAACACAACUUGACC(dT)(dT)
Gabbr2-siRNA-3	CCUCAUGCUAUUCGGUUGU(dT)(dT)	ACAACCGAAUAGCAUGAGG(dT)(dT)
Enpp1-siRNA-1	CGAUCAUGGACUUCGAGAA(dT)(dT)	UUCUCGAAGUCCAUGAUCG(dT)(dT)
Enpp1-siRNA-2	GACUGUUGCAUCAACUACA(dT)(dT)	UGUAGUUGAUGCAACAGUC(dT)(dT)
Enpp1-siRNA-3	GGCUACAGCUUCCUAGCUA(dT)(dT)	UAGCUAGGAAGCUGUAGCC(dT)(dT)
Enpp1-siRNA-4	CAAGAUGUAUGAUCCUAAA(dT)(dT)	UUUAGGAUCAUACAUCUUG(dT)(dT)
Enpp1-siRNA-5	GAGUCUCACGUCAAAUAUA(dT)(dT)	UAUAUUUGACGUGAGACUC(dT)(dT)
Gpc4-siRNA-1	CGGAAGUGCGACGUCUCUA(dT)(dT)	UAGAGACGUCGCACUUCCG(dT)(dT)
Gpc4-siRNA-2	CUUCAGAGUUUGAGUACAA(dT)(dT)	UUGUACUCAAACUCUGAAG(dT)(dT)
Gpc4-siRNA-3	CACUGCUGAAGAUGAUCUA(dT)(dT)	UAGAUCAUCUUCAGCAGUG(dT)(dT)
Prnp-siRNA-1	GACCGCUACUACCGAGAAA(dT)(dT)	UUUCUCGGUAGUAGCGGUC(dT)(dT)
Prnp-siRNA-2	CGUGCACGACUGUGUCAAU(dT)(dT)	AUUGACACAGUCGUGCACG(dT)(dT)
Prnp-siRNA-3	CCCAUAAUCAGUGGAACAA(dT)(dT)	UUGUUCCACUGAUUAUGGG(dT)(dT)
