# Supplementary material for: Endogenous cell membrane interactome mapping for GLP-1 receptor via ligand-based proximity labeling
Source: Research Square preprint supplement (doi:10.21203/rs.3.rs-3449159/v1), 2023-10-27
Supplement: Supplementary file 4 [file 6f41954928fb043587996a38.xlsx]

## Sheet: Sheet1
Supplementary Table 4: Kinetic profiles of the enrichment intensity for putative Glp-1r cell membrane interactors
Protein.Group	Genes	First.Protein.Description	5 min-1 intensity	5 min-2 intensity	15 min-1 intensity	15 min-2 intensity	30 min-1 intensity	30 min-2 intensity	60 min-1 intensity	60 min-2 intensity	Cluster
A0A096MJ54	Itprip	Inositol 1,4,5-trisphosphate receptor-interacting protein	3557.49	3071.18	3760.23	4618.04	4575.98	5809.79	3987.65	4236.97	4
A0A0A0MY13	Gpr158	Probable G-protein-coupled receptor 158	2995.26	2940.93	2404.31	1853.78	1490.11	3471.68	3646.95	2246.54	3
A0A0G2JSI4;A0A8I5ZM38;A0A8I6G2Z6	Adgre5	Adhesion G protein-coupled receptor E5	11628.5	11356.4	5709.39	7221.99	7050.62	8761.26	5872.96	5394.77	2
A0A0G2K663	Marveld2	MARVEL domain-containing 2	49659.7	55037.7	37361.9	33924.6	34216.7	41644	43409.2	34423	1
A0A0G2K728	Cdh4	Cadherin-4	210988	218347	124012	88402.8	108160	121815	118422	90248.1	1
A0A8J8YIL8;F1LM54	Fgfr1	Fibroblast growth factor receptor	7109.24	9107.89	4539.86	5998.86	5223.93	4298.59	3357.94	2743.94	2
A0A8L2QZI9	Marveld2	Occludin	529288	568666	259070	178532	232145	264307	306882	232221	1
A0A8L2UHD3	Alcam	CD166 antigen	12284.2	16445.1	5323.25	5062.35	6145.26	7472.82	6810.82	4316.61	1
B4F7C5	Lrrtm4	Leucine-rich repeat transmembrane neuronal protein 4	23699.6	24075.2	14621.1	13654.9	15337.1	18038.1	15579.5	12200.3	2
D3ZTV3	Flrt2	Leucine-rich repeat transmembrane protein FLRT2	154697	142213	67078.2	71398.5	63277.6	89420.5	67752.5	76478.1	1
F1LQP8	Cdh6	Cadherin-6	60933.3	99106.9	35542.3	31806.4	34241.2	47846.2	36221.8	17859	2
F1LR98	Cdh10	Cadherin 10	9387.28	9582.09	4364.86	3209.43	3295.16	5248.22	4336.55	4036.13	1
F1LYX9	Dsg2	Desmoglein 2	118915	134437	71701	66265.4	64245.5	76904.9	77213.9	52620.8	1
O08565	Cxcr4	C-X-C chemokine receptor type 4	3540.57	6841.82	2776.81	3113.24	3073.4	4335.57	4569.72	3227.18	2
O35112	Alcam	CD166 antigen	751675	717458	333321	289032	248494	316796	326830	225691	1
O55159	Epcam	Epithelial cell adhesion molecule	141840	129941	83188.6	84148.5	93683.8	101087	123904	101465	2
O88775	Emb	Embigin	112455	106147	116472	110201	125445	120684	132875	110048	4
O88871	Gabbr2	Gamma-aminobutyric acid type B receptor subunit 2	34201.6	38620.1	24813.2	26709.3	26386.7	29241.5	29835.3	22870.2	2
P04218	Cd200	OX-2 membrane glycoprotein	388957	433634	199819	203608	207051	227920	247727	206909	1
P06494	Erbb2	Receptor tyrosine-protein kinase erbB-2	1725.88	1861.02		1855.98	2877.7	3004.54		2139.47	4
P07174	Ngfr	Tumor necrosis factor receptor superfamily member 16	233524	216126	117499	77854.7	134652	165017	147485	136209	2
P07340	Atp1b1	Sodium/potassium-transporting ATPase subunit beta-1	1750000	1750000	1110000	1080000	1180000	1320000	1380000	1070000	2
P0C5H6	Igsf9	Protein turtle homolog A	2940.53	3097.55	1431.3	1411.2	1553.05	2053.97	1829.52	1210.86	2
P12336	Slc2a2	Solute carrier family 2, facilitated glucose transporter member 2	654335	669313	336276	319846	321789	432448	385963	306591	1
P13596	Ncam1	Neural cell adhesion molecule 1	840069	874641	433640	402223	362520	436805	473186	345185	1
P13852	Prnp	Major prion protein	92769.3	113897	55943.7	59386.7	56073.4	65394.3	66541.1	55141.6	1
P16573	Ceacam1	Carcinoembryonic antigen-related cell adhesion molecule 1	49814	60877.4	34643.5	35200.2	29983.1	35838	39498.4	30114.5	1
P26431	Slc9a1	Sodium/hydrogen exchanger 1	80309.2	86256.6	58133.4	54532.3	68685.5	67732.5	69937.9	60018.9	2
P35353	Crhr1	Corticotropin-releasing factor receptor 1	100324	110935	29591.2	37846.8	44846.9	56152.3	48106.2	20024.2	2
P35952	Ldlr	Low-density lipoprotein receptor	34540.4	36652.6	25436.7	28444.2	25618	29062.9	29192.5	29100.2	2
P40190	Il6st	Interleukin-6 receptor subunit beta	50435.8	52062.9	33586.8	36222.3	29002.4	30153.9	32211.8	27536.6	1
P42893	Ece1	Endothelin-converting enzyme 1	132235	131198	87330	89509.4	88942.8	90990.1	110221	84501	1
P43219	Gipr	Gastric inhibitory polypeptide receptor	88848.2	72376.4	50647.1	46783.6	40299.4	51080	47502.7	36145.1	1
P49134	Itgb1	Integrin beta-1	447299	445812	363076	338627	348589	359499	387105	321230	2
P52796	Efnb1	Ephrin-B1	69882.6	84383.9	43427.2	37799.8	29438.4	34742.8	42500.2	31553.2	1
P54757	Epha5	Ephrin type-A receptor 5	3415.81	5503.86	2012.31	2767.77	1970.41	4020.93	2430.52	1921.33	2
P54759	Epha7	Ephrin type-A receptor 7	7986.74	8235.4	4948.07	4277.48	3210.92	4811.03	5443.54	4027.77	2
P97603	Neo1	Neogenin (Fragment)	103794	110732	65138.3	63651.8	65902.8	71419.6	61359.2	50323.1	2
P97675	Enpp3	Ectonucleotide pyrophosphatase/phosphodiesterase family member 3	29933.9	32793	17607.2	18958.2	13269.1	15725.3	17648	15433.3	1
P97677	Dll1	Delta-like protein 1	15501.1	15656.2	9628.55	8777.21	9925.96	10480.6	11586.5	7802.16	2
P97685	Nfasc	Neurofascin	571815	618553	313349	301851	282127	350697	269040	206429	1
Q02955	Il1r1	Interleukin-1 receptor type 1	74449	72121.9	45516.2	45429.6	49141.1	54151	56238.1	37042.9	2
Q04589	Fgfr1	Fibroblast growth factor receptor 1	1684.44	7144.05	3068.82	3735.36	2281.44	2849	4850.31	4142.98	3
Q0PMD2	Antxr1	Anthrax toxin receptor 1	4962.41	5612.93	4013.94	3408.93	4231.89	3347.25	4645.37	3457.42	2
Q1WIM3	Cadm3	Cell adhesion molecule 3	42712.3	40985.2	29052.3	22596.2	23212	25539.9	30573.7	27610.3	1
Q45R42	Lrrc4	Leucine-rich repeat-containing protein 4	14882.4	16467	9710.3	8410.08	9402.3	9947.68	11940	8086.51	1
Q498D6	Fgfr4	Fibroblast growth factor receptor 4	31903.9	36326.7	20750.2	21598.3	21267.7	24401.5	23497.3	22377.3	1
Q5PQV5	Tpbg	Trophoblast glycoprotein	24812.3	19227.4	15700.8	17226.1	14830.2	16616.6	19174.6	15138.9	1
Q5U308	Lrrc8d	Volume-regulated anion channel subunit LRRC8D	30361.9	28958.2	20472.8	18936.4	21640.1	23842.9	21576.7	18432.8	2
Q62682	Cntn3	Contactin-3	32133.2	31741	11875.3	15554.1	12906.4	16802.4	14142.3	11132.5	1
Q62718	Ntm	Neurotrimin	3369.56	4117.47	3205.5	3763.68	3645.9	3340.7	3770.1	2909.18	3
Q62888	Nlgn2	Neuroligin-2	27841.6	31318.6	17346.8	21983.2	17388.8	18339.8	19053.9	12842	2
Q62889	Nlgn3	Neuroligin-3	6034.21	5547.82	4568.78	4177.07	3454.04	5179.88	4785.9	4091.05	2
Q63149	Cdh4	Cadherin-4 (Fragment)	399625	411538	230607	202810	212076	239325	228675	170533	1
Q63199	Fas	Tumor necrosis factor receptor superfamily member 6	7085.71	4317.41	7274.17	7566.26	8444.98	5416.44	8648.95	6733.75	4
Q63377	Atp1b3	Sodium/potassium-transporting ATPase subunit beta-3	184596	177070	111704	107844	101038	127967	126291	90708.4	2
Q63474	Ddr1	Epithelial discoidin domain-containing receptor 1	30315.7	28771.9	20016.5	17971.1	15115.1	21510.4	21377.3	21001.2	2
Q63604	Ntrk2	BDNF/NT-3 growth factors receptor	23397.1	23973.2	12007.4	11312.6	9475.62	10859.6	12344.1	10675	1
Q642B0	Gpc4	Glypican 4	185278	198815	163787	187147	203787	190009	219629	190353	4
Q66H28	Pacc1	Proton-activated chloride channel	280824	247068	285631	304807	346439	325316	392355	346854	4
Q68FQ2	Jam3	Junctional adhesion molecule C	65509	86430.6	51784.4	42950.9	52831.9	57379.2	61774.9	52987.8	2
Q6AYF7	Mfap3	Microfibril-associated glycoprotein 3	3308.86	4166.14	3712.32	3164.07	4164.08	4663.68	4157.04	4212.39	4
Q6AYP5	Cadm1	Cell adhesion molecule 1	245238	251214	117598	114026	123313	136610	138609	102624	1
Q6AZ61	Lmbrd1	Lysosomal cobalamin transport escort protein LMBD1	5516.97	6336.29	4858.82	6223.84	4071.04	4292.99	3805.91	6917.53	3
Q6Q629	Dpp10	Inactive dipeptidyl peptidase 10	6181.81	5434.32	2873.97	3607.66	2310.55	3892.07	3666.95	3041.61	2
Q794F9	Slc3a2	4F2 cell-surface antigen heavy chain	385167	450055	327327	302636	341229	350044	366788	330243	2
Q80WD0	Rtn4rl1	Reticulon-4 receptor-like 1	5884.41	5227.22	3189.81	4018.85	3647.14	4205.17	5156.92	5177.41	3
Q80WD1	Rtn4rl2	Reticulon-4 receptor-like 2	4964.18	5878.3	3492.61	3218.69	2505.9	3649.06	2534.98	2826.14	1
Q80ZD7	Amigo1	Amphoterin-induced protein 1	11428.8	11398.2	6079.93	7103.03	6092.71	7342.79	6614.2	5381.3	1
Q8CHL0	Fzd5	Frizzled-5	4135.1	5531.18	2818.91		2989.19		1457.51		2
Q8K5A9	Nradd	Death domain-containing membrane protein NRADD	47383	60701.3	27144.9	27418.3	26949.5	26694.5	31333.5	18651.1	1
Q8R1R5	Cd99l2	CD99 antigen-like protein 2	34320.3	29920.2	20833.9	15696.3	24667.5	26297.7	37436	29169.3	3
Q8R4E1	Itfg1	T-cell immunomodulatory protein	19930.6	23185.6	19680	21756.2	16785.5	12715.4	21231.8	22698.5	3
Q8VHW9	Cacng4	Voltage-dependent calcium channel gamma-4 subunit	7555.02	7838.14	8851.72	7002.3	9992.31	9437.73	12386.2	7659.03	4
Q924C3	Enpp1	Ectonucleotide pyrophosphatase/phosphodiesterase family member 1	414144	430883	254341	234572	273918	271606	263618	226572	1
Q99376	Tfrc	Transferrin receptor protein 1	745495	741564	424165	422444	363024	418279	422274	330661	1
Q99M75	Rtn4r	Reticulon-4 receptor	16088.3	15954.2	8145.3	7717.69	6883.74	8450.2	9903.01	6271.54	1
Q9EQ25	Slc38a4	Sodium-coupled neutral amino acid transporter 4	237912	260178	123613	132092	194309	198206	186107	175392	2
Q9JHY1	F11r	Junctional adhesion molecule A	135695	168754	94893.9	88871.2	94793.2	112511	117254	86120.6	1
Q9JI66	Slc4a4	Electrogenic sodium bicarbonate cotransporter 1	180046	161663	111346	93055.6	120288	127096	120084	91138.5	2
Q9R066	Cxadr	Coxsackievirus and adenovirus receptor homolog	322326	378268	220222	181933	213439	256569	273091	187846	2
Q9Z0J8	Negr1	Neuronal growth regulator 1	31481	31482.4	9487.16	9681.99	10349.8	14364.7	14632.2	8951.2	1
Q9Z1Y3	Cdh2	Cadherin-2	146587	146976	87657.5	73518.9	66822.3	80852.1	82446	64591.8	1
