# Supplementary material for: Endogenous cell membrane interactome mapping for GLP-1 receptor via ligand-based proximity labeling
Source: Research Square preprint supplement (doi:10.21203/rs.3.rs-3449159/v1), 2023-10-27
Supplement: Supplementary file 5 [file 8dd77388d92b3a9b92f25307.xlsx]

## Sheet: INS-1E
Supplementary Table 2: Putative cell membrane interactors for the GLP-1 receptor in two cell types
Note: Y indicates the protein was only detected in the GLP-1-APEX2 (GA) group.
Protein.Group	Genes	First.Protein.Description	log10(GA/PBS)	P.value-(GA/PBS)	log2(GA/(GA+GLP-1))	P.value-(GA/(GA+GLP-1))	GPCR	Ion channel	Transporter	Cell membrane protein
A0A0G2JSI4;A0A8I5ZM38;A0A8I6G2Z6	Adgre5	Adhesion G protein-coupled receptor E5		Y	3.65115	6.7763e-05	FALSE	FALSE	FALSE	TRUE
A0A0G2K663	Marveld2	MARVEL domain-containing 2		Y	3.2975	0.000237614	FALSE	FALSE	FALSE	TRUE
A0A0G2K728	Cdh4	Cadherin-4	3.13974	Y	3.07599	0.000271154	FALSE	FALSE	FALSE	TRUE
A0A8I6A609	Gpc6	Glypican 6		Y	3.28934	0.000144115	FALSE	FALSE	FALSE	TRUE
A0A8J8YIL8;F1LM54	Fgfr1	Fibroblast growth factor receptor		Y	3.03746	0.000129182	FALSE	FALSE	FALSE	TRUE
A0A8L2QZI9	Marveld2	Occludin	2.84317	3.77966e-06	3.43593	0.000311919	FALSE	FALSE	FALSE	TRUE
A0A8L2UHD3	Alcam	CD166 antigen		Y	3.66718	0.000175921	FALSE	FALSE	FALSE	TRUE
B4F7C5	Lrrtm4	Leucine-rich repeat transmembrane neuronal protein 4		Y	3.14964	3.79478e-05	FALSE	FALSE	FALSE	TRUE
D3ZTV3	Flrt2	Leucine-rich repeat transmembrane protein FLRT2		Y	3.38592	1.49846e-05	FALSE	FALSE	FALSE	TRUE
F1LQP8	Cdh6	Cadherin-6	3.06417	3.9037e-08	3.18337	3.7997e-05	FALSE	FALSE	FALSE	TRUE
F1LR98	Cdh10	Cadherin 10		Y	3.19415	0.0412869	FALSE	FALSE	FALSE	TRUE
F1LYX9	Dsg2	Desmoglein 2	2.57631	9.88241e-07	3.30538	0.000251795	FALSE	FALSE	FALSE	TRUE
O08565	Cxcr4	C-X-C chemokine receptor type 4		Y	3.21309	0.00410446	TRUE	FALSE	FALSE	TRUE
O35112	Alcam	CD166 antigen	2.83757	6.67218e-08	3.44506	2.58744e-05	FALSE	FALSE	FALSE	TRUE
O55159	Epcam	Epithelial cell adhesion molecule	2.49107	0.000388664	3.26162	0.0154308	FALSE	FALSE	FALSE	TRUE
O70535	Lifr	Leukemia inhibitory factor receptor		Y	3.11642	0.00123463	FALSE	FALSE	FALSE	TRUE
O88775	Emb	Embigin	2.47946	1.40056e-07	3.0374	5.04634e-05	FALSE	FALSE	FALSE	TRUE
O88871	Gabbr2	Gamma-aminobutyric acid type B receptor subunit 2	2.02934	3.46786e-07	3.10633	3.35062e-05	TRUE	FALSE	FALSE	TRUE
P04218	Cd200	OX-2 membrane glycoprotein	2.75354	3.16925e-07	3.56485	8.07504e-05	FALSE	FALSE	FALSE	TRUE
P06494	Erbb2	Receptor tyrosine-protein kinase erbB-2		Y	3.21308	0.000700538	FALSE	FALSE	FALSE	TRUE
P07174	Ngfr	Tumor necrosis factor receptor superfamily member 16	2.68681	1.33312e-07	3.44481	3.69586e-05	FALSE	FALSE	FALSE	TRUE
P07340	Atp1b1	Sodium/potassium-transporting ATPase subunit beta-1	2.27305	1.91547e-07	3.24857	2.79944e-05	FALSE	FALSE	TRUE	TRUE
P0C5H6	Igsf9	Protein turtle homolog A		Y	3.18734	4.57625e-06	FALSE	FALSE	FALSE	TRUE
P12336	Slc2a2	Solute carrier family 2, facilitated glucose transporter member 2	2.01973	3.33893e-07	3.37539	1.93659e-05	FALSE	FALSE	TRUE	TRUE
P13596	Ncam1	Neural cell adhesion molecule 1	2.77965	5.47906e-08	3.38476	2.09869e-05	FALSE	FALSE	FALSE	TRUE
P13852	Prnp	Major prion protein	2.54009	3.56456e-07	3.38896	7.60892e-05	FALSE	FALSE	FALSE	TRUE
P16573	Ceacam1	Carcinoembryonic antigen-related cell adhesion molecule 1		Y	3.24271	7.11331e-05	FALSE	FALSE	FALSE	TRUE
P26431	Slc9a1	Sodium/hydrogen exchanger 1	2.04032	8.63506e-08	3.12749	8.51632e-06	FALSE	FALSE	TRUE	TRUE
P26824	F2r	Proteinase-activated receptor 1		Y	3.13565	0.000590871	TRUE	FALSE	FALSE	TRUE
P35353	Crhr1	Corticotropin-releasing factor receptor 1	2.17432	7.95616e-07	3.30914	7.75359e-05	TRUE	FALSE	FALSE	TRUE
P35952	Ldlr	Low-density lipoprotein receptor	2.00875	2.0346e-07	3.34912	1.20768e-05	FALSE	FALSE	TRUE	TRUE
P40190	Il6st	Interleukin-6 receptor subunit beta	2.03781	8.7911e-06	3.11182	0.000229514	FALSE	FALSE	FALSE	TRUE
P42893	Ece1	Endothelin-converting enzyme 1	2.13768	0.000119614	3.49538	0.0054495	FALSE	FALSE	FALSE	TRUE
P43219	Gipr	Gastric inhibitory polypeptide receptor	2.20419	1.41179e-06	3.23829	0.00016454	TRUE	FALSE	FALSE	TRUE
P47820	Ace	Angiotensin-converting enzyme		Y	3.10519	0.000131857	FALSE	FALSE	FALSE	TRUE
P49134	Itgb1	Integrin beta-1	2.70968	8.5239e-09	3.13954	4.53198e-06	FALSE	FALSE	FALSE	TRUE
P52796	Efnb1	Ephrin-B1	2.72792	Y	3.53861	0.000232671	FALSE	FALSE	FALSE	TRUE
P54757	Epha5	Ephrin type-A receptor 5		Y	3.13351	6.19073e-05	FALSE	FALSE	FALSE	TRUE
P54759	Epha7	Ephrin type-A receptor 7	2.19865	3.12912e-07	3.52643	2.30973e-05	FALSE	FALSE	FALSE	TRUE
P97603	Neo1	Neogenin (Fragment)	2.32293	0.000377685	3.13516	0.0327554	FALSE	FALSE	FALSE	TRUE
P97675	Enpp3	Ectonucleotide pyrophosphatase/phosphodiesterase family member 3	2.32482	1.65646e-06	3.20083	0.000276173	FALSE	FALSE	FALSE	TRUE
P97677	Dll1	Delta-like protein 1		Y	3.22689	0.000189188	FALSE	FALSE	FALSE	TRUE
P97685	Nfasc	Neurofascin	2.92406	2.56972e-08	3.13406	2.1107e-05	FALSE	FALSE	FALSE	TRUE
Q02955	Il1r1	Interleukin-1 receptor type 1	2.56393	2.68909e-08	3.21209	8.85202e-06	FALSE	FALSE	FALSE	TRUE
Q04589	Fgfr1	Fibroblast growth factor receptor 1		Y	3.1603	0.000154638	FALSE	FALSE	FALSE	TRUE
Q0PMD2	Antxr1	Anthrax toxin receptor 1		Y	3.24723	4.57383e-05	FALSE	FALSE	FALSE	TRUE
Q1WIM3	Cadm3	Cell adhesion molecule 3	2.63641	1.2415e-06	3.72708	0.000180975	FALSE	FALSE	FALSE	TRUE
Q45R42	Lrrc4	Leucine-rich repeat-containing protein 4		Y	3.4982	0.000169799	FALSE	FALSE	FALSE	TRUE
Q498D6	Fgfr4	Fibroblast growth factor receptor 4	2.27861	5.76225e-05	3.04873	0.0077829	FALSE	FALSE	FALSE	TRUE
Q5HZW5	Cd320	CD320 antigen		Y	3.07231	0.00102535	FALSE	FALSE	FALSE	TRUE
Q5PQV5	Tpbg	Trophoblast glycoprotein		Y	3.17565	0.000280437	FALSE	FALSE	FALSE	TRUE
Q5U308	Lrrc8d	Volume-regulated anion channel subunit LRRC8D	2.08654	8.36514e-07	3.29245	6.61177e-05	FALSE	TRUE	FALSE	TRUE
Q62682	Cntn3	Contactin-3		Y	3.17645	0.000316283	FALSE	FALSE	FALSE	TRUE
Q62718	Ntm	Neurotrimin		Y	3.04202	0.000248913	FALSE	FALSE	FALSE	TRUE
Q62888	Nlgn2	Neuroligin-2	2.09519	Y	3.55326	3.42628e-05	FALSE	FALSE	FALSE	TRUE
Q62889	Nlgn3	Neuroligin-3		Y	3.38063	1.4401e-05	FALSE	FALSE	FALSE	TRUE
Q63149	Cdh4	Cadherin-4 (Fragment)	3.1512	7.88224e-06	3.16348	0.00150703	FALSE	FALSE	FALSE	TRUE
Q63199	Fas	Tumor necrosis factor receptor superfamily member 6		Y	3.07759	0.000230653	FALSE	FALSE	FALSE	TRUE
Q63377	Atp1b3	Sodium/potassium-transporting ATPase subunit beta-3	2.38974	5.21335e-07	3.15361	0.000116757	FALSE	FALSE	TRUE	TRUE
Q63474	Ddr1	Epithelial discoidin domain-containing receptor 1	2.0509	1.05478e-06	3.16723	9.36065e-05	FALSE	FALSE	FALSE	TRUE
Q63604	Ntrk2	BDNF/NT-3 growth factors receptor		Y	3.13069	0.000218529	FALSE	FALSE	FALSE	TRUE
Q642B0	Gpc4	Glypican 4	2.77117	7.47426e-08	3.11102	4.55089e-05	FALSE	FALSE	FALSE	TRUE
Q66H28	Pacc1	Proton-activated chloride channel	2.29515	2.42966e-08	3.14361	4.73874e-06	FALSE	TRUE	TRUE	TRUE
Q66H42	Lypd1	Ly6/PLAUR domain-containing protein 1		Y	3.6963	6.97289e-05	FALSE	FALSE	FALSE	TRUE
Q68FQ2	Jam3	Junctional adhesion molecule C		Y	3.01491	0.000122643	FALSE	FALSE	FALSE	TRUE
Q6AYF7	Mfap3	Microfibril-associated glycoprotein 3		Y	3.2958	1.05104e-05	FALSE	FALSE	FALSE	TRUE
Q6AYP5	Cadm1	Cell adhesion molecule 1		Y	3.97982	9.40762e-05	FALSE	FALSE	FALSE	TRUE
Q6Q629	Dpp10	Inactive dipeptidyl peptidase 10		Y	3.28452	0.000354654	FALSE	FALSE	FALSE	TRUE
Q794F9	Slc3a2	4F2 cell-surface antigen heavy chain	2.1488	1.42256e-07	3.03254	2.25353e-05	FALSE	FALSE	TRUE	TRUE
Q80WD0	Rtn4rl1	Reticulon-4 receptor-like 1		Y	3.07511	7.83717e-05	FALSE	FALSE	FALSE	TRUE
Q80WD1	Rtn4rl2	Reticulon-4 receptor-like 2		Y	3.68258	0.000383138	FALSE	FALSE	FALSE	TRUE
Q80ZD7	Amigo1	Amphoterin-induced protein 1		Y	3.35541	0.000173822	FALSE	FALSE	FALSE	TRUE
Q8CHL0	Fzd5	Frizzled-5		Y	3.30055	0.00081399	TRUE	FALSE	FALSE	TRUE
Q8K5A9	Nradd	Death domain-containing membrane protein NRADD	2.59828	1.40024e-05	3.41658	0.000734503	FALSE	FALSE	FALSE	TRUE
Q8R1R5	Cd99l2	CD99 antigen-like protein 2		Y	3.20035	0.000201622	FALSE	FALSE	FALSE	TRUE
Q8R4E1	Itfg1	T-cell immunomodulatory protein	2.01174	Y	3.19651	3.28581e-05	FALSE	FALSE	FALSE	TRUE
Q8VHW9	Cacng4	Voltage-dependent calcium channel gamma-4 subunit		Y	3.16344	0.000132312	FALSE	TRUE	FALSE	TRUE
Q924C3	Enpp1	Ectonucleotide pyrophosphatase/phosphodiesterase family member 1	2.36585	8.89902e-08	3.36445	1.3619e-05	FALSE	FALSE	FALSE	TRUE
Q99376	Tfrc	Transferrin receptor protein 1	2.25466	1.06586e-07	3.69424	7.08063e-06	FALSE	FALSE	FALSE	TRUE
Q99M75	Rtn4r	Reticulon-4 receptor		Y	3.35649	2.92784e-05	FALSE	FALSE	FALSE	TRUE
Q9EQ25	Slc38a4	Sodium-coupled neutral amino acid transporter 4	2.39751	2.01424e-07	3.00135	6.32756e-05	FALSE	FALSE	TRUE	TRUE
Q9JHY1	F11r	Junctional adhesion molecule A	2.30378	2.64385e-08	3.20716	4.67933e-06	FALSE	FALSE	FALSE	TRUE
Q9JI66	Slc4a4	Electrogenic sodium bicarbonate cotransporter 1	2.24872	6.46035e-08	3.36926	7.31893e-06	FALSE	FALSE	TRUE	TRUE
Q9R066	Cxadr	Coxsackievirus and adenovirus receptor homolog	2.89255	3.64552e-08	3.28237	2.12802e-05	FALSE	FALSE	FALSE	TRUE
Q9Z0J8	Negr1	Neuronal growth regulator 1	2.91306	Y	3.46661	0.000206136	FALSE	FALSE	FALSE	TRUE
Q9Z1Y3	Cdh2	Cadherin-2	2.95622	1.62067e-08	3.19671	1.27756e-05	FALSE	FALSE	FALSE	TRUE
A0A096MJ54	Itprip	Inositol 1,4,5-trisphosphate receptor-interacting protein		Y		Y	FALSE	FALSE	FALSE	TRUE
A0A0A0MY13	Gpr158	Probable G-protein-coupled receptor 158		Y		Y	TRUE	FALSE	FALSE	TRUE
A0A8I6ABL6;G3V803	Cdh2	Cadherin-2		Y		Y	FALSE	FALSE	FALSE	TRUE
A0A8I6ACJ0;D4A188	Rgma	Repulsive guidance molecule BMP co-receptor a		Y		Y	FALSE	FALSE	FALSE	TRUE
A4KWA8;Q925N7	Clec2d6;Ocil	C-type lectin domain family 2 member D6		Y		Y	FALSE	FALSE	FALSE	TRUE
P19024	Kcna5	Potassium voltage-gated channel subfamily A member 5		Y		Y	FALSE	TRUE	FALSE	TRUE
P22934	Tnfrsf1a	Tumor necrosis factor receptor superfamily member 1A		Y		Y	FALSE	FALSE	FALSE	TRUE
Q08463	Fzd1	Frizzled-1		Y		Y	TRUE	FALSE	FALSE	TRUE
Q6AZ61	Lmbrd1	Lysosomal cobalamin transport escort protein LMBD1		Y		Y	FALSE	FALSE	TRUE	TRUE
Q9ESG3	Cltrn	Collectrin		Y		Y	FALSE	FALSE	FALSE	TRUE

## Sheet: SK-N-SH
Note: Y indicates the protein was only detected in the GLP-1-APEX2 (GA) group.
Protein.Group	Genes	First.Protein.Description	log10(GA/PBS)	P.value-(GA/PBS)	log2(GA/(GA+GLP-1))	P.value-(GA/(GA+GLP-1))	GPCR	Ion channel	Transporter	Cell membrane protein
Q12846	STX4	Syntaxin-4		Y	1.88181	0.035458	FALSE	FALSE	TRUE	TRUE
A0A2R8Y2R1;A0A2R8Y416;A0A2R8Y448;A0A2R8Y5J3;A0A2R8Y5J6;A0A2R8Y5Q3;A0A2R8Y5X0;A0A2R8Y621;A0A2R8Y628;A0A2R8Y652;A0A2R8Y6D4;A0A2R8Y6S4;A0A2R8Y6U6;A0A2R8Y7J1;A0A2R8Y7Q5;A0A2R8YD68;A0A2R8YE16;A0A2R8YE48;A0A2R8YE99;A0A2R8YEY2;A0A2R8YFA5;A0A2R8YH84;A0A2U3TZN7;C9JR67	SGCE	Epsilon-sarcoglycan (Fragment)		Y	1.84302	0.0400293	FALSE	FALSE	FALSE	TRUE
Q92823	NRCAM	Neuronal cell adhesion molecule	2.52181	1.56445e-05	1.7602	0.0492166	FALSE	FALSE	FALSE	TRUE
Q5JTD0	TJAP1	Tight junction-associated protein 1		Y	1.72462	0.0255981	FALSE	FALSE	FALSE	TRUE
Q9NQS3	NECTIN3	Nectin-3		Y	1.71018	0.0314258	FALSE	FALSE	FALSE	TRUE
P19256	CD58	Lymphocyte function-associated antigen 3		Y	1.45481	0.0491745	FALSE	FALSE	FALSE	TRUE
Q10589	BST2	Bone marrow stromal antigen 2		Y	1.44109	0.0220733	FALSE	FALSE	FALSE	TRUE
Q9NT68	TENM2	Teneurin-2		Y	1.34651	0.0392795	FALSE	FALSE	FALSE	TRUE
Q15760	GPR19	Probable G-protein coupled receptor 19		Y	1.27097	0.028086	TRUE	FALSE	FALSE	TRUE
Q8NE79	BVES	Blood vessel epicardial substance		Y	1.23179	0.043329	FALSE	FALSE	FALSE	TRUE
B1AL88	NALF1	NALCN channel auxiliary factor 1		Y	1.17137	0.028337	FALSE	FALSE	FALSE	TRUE
Q9ULI3	HEG1	Protein HEG homolog 1		Y	1.1606	0.0214568	FALSE	FALSE	FALSE	TRUE
P43115	PTGER3	Prostaglandin E2 receptor EP3 subtype		Y	1.13087	0.0211321	TRUE	FALSE	FALSE	TRUE
P51636	CAV2	Caveolin-2		Y		Y	FALSE	FALSE	FALSE	TRUE
Q9UQ52	CNTN6	Contactin-6		Y		Y	FALSE	FALSE	FALSE	TRUE
